# Supplementary material for: Ni(ii)-catalyzed mono-selective ortho-arylation of unactivated aryl C–H bonds utilizing amino acids as a directing group
Source: Royal Society of Chemistry journal article supplement (doi:10.1039/c9ra00749k), 2019-01-01

## ***Supporting Information***

### **Ni(II)-Catalyzed Mono-Selective *ortho*-Arylation of Unactivated Aryl C-H Bonds Utilizing Amino Acid as A Directing Group**

Zhanqing Cong<sup>a,b,c,#</sup>, Feng Gao<sup>a,b,#</sup> and Hong Liu<sup>a,b,c,\*</sup>

<sup>a</sup> State Key Laboratory of Receptor Research, Shanghai Institute of Materia Medica, Chinese Academy of Sciences, 555 Zuchongzhi Road, Shanghai 201203, China.

<sup>b</sup> University of Chinese Academy of Sciences, No.19A Yuquan Road, Beijing 100049, China.

<sup>c</sup> School of Life Science and Technology, ShanghaiTech University, 100 haik Road, Shanghai, 201210, China

<sup>#</sup> These authors contributed equally.

hliu@simm.ac.cn (Hong Liu)

## ***Table of Contents***

|                                    |    |
|------------------------------------|----|
| 1. General information .....       | 2  |
| 2. Experimental Procedures.....    | 2  |
| 3. Mechanistic investigations..... | 15 |
| 4. References.....                 | 17 |
| 5. NMR spectra.....                | 18 |

## 1. General Information

Unless otherwise noted, the reagents (chemicals) were purchased from commercial sources, and used without further purification. Water was deionized before used. Analytical thin layer chromatography (TLC) was HSGF 254 (0.15-0.2 mm thickness). Compound spots were visualized by UV light (254 nm). Column chromatography was performed on silica gel FCP 200-300. NMR spectra were run on 500 MHz instrument. Chemical shifts were reported in parts per million (ppm,  $\delta$ ) downfield from tetramethylsilane. Proton coupling patterns are described as singlet (s), doublet (d), triplet (t), quartet (q), multiplet (m), and broad (br). Low- and high-resolution mass spectra (LRMS and HRMS) were measured on spectrometer. Melting points were measured on melting point apparatus.

## 2. Experimental Procedures

### General procedure for synthesis of 2-benzamido-2-methylpropanoic acid<sup>1</sup>

General Procedure for the Synthesis of Substrates **1a**. 2-Amino-2-methylpropionic acid (2 g, 19.4 mmol) was dissolved in 1M NaOH aqueous solution (20 mL). The mixture was cooled to 0 °C, and then benzoyl chloride (2.30 mL, 19.4 mmol) and 1M NaOH aqueous solution (20 mL) were added dropwise simultaneously. The resulting mixture was stirred for 5 h at room temperature. Then 1 M HCl (60 mL) was added to the reaction mixture and stirred for 10 min. The resulting solid was collected by filtration and washed with water and Et<sub>2</sub>O. The desired product **1a** was obtained as a white solid (3.02 g, 72%).

### General procedures for Ni(II)-Catalyzed Mono-Selective ortho-Arylation of Unactivated Aryl C-H Bonds

Synthesis of **3a** is representative. A 25 mL tube equipped with a magnetic stir bar was charged with 2-amino-2-methylpropionic acid **1a** (0.2 mmol), 1-iodo-4-methylbenzene **2a** (0.60 mmol), Ni(OTf)<sub>2</sub> (10 mol%), MesCOOH (20 mol%), TBAI (0.6 mmol) and Na<sub>2</sub>CO<sub>3</sub> (0.6 mmol). 2 mL of DMSO was charged, and then the resulting mixture was stirred in a pre-heated oil bath at 140 °C for 16 h. After the reaction was completed, 1 M HCl (4 mL) was added to the reaction, the mixture was extracted with Et<sub>2</sub>O (30 mL) three times and the organic solvent was removed under vacuum. The residue was purified by silica gel column using 2% methanol in DCM as eluent to afford desired arylation product **3a** as a white solid.

### 2-methyl-2-(4'-methyl-[1,1'-biphenyl]-2-carboxamido)propanoic acid (**3a**)

Compound **3a** was prepared as described in general procedure for Ni(II)-catalyzed mono-selective ortho-arylation of unactivated aryl C-H bonds. White solid, 48.6 mg, 81% yield. Mp: 177-181 °C. <sup>1</sup>H NMR (500 MHz, DMSO-*d*<sub>6</sub>)  $\delta$  8.41 (s, 1H), 7.50 – 7.46 (m, 1H), 7.40 – 7.37 (m, 3H), 7.34 (d, *J* = 8.0 Hz, 2H), 7.18 (d, *J* = 7.9 Hz, 2H), 2.33 (s, 3H), 1.31 (s, 6H). <sup>13</sup>C NMR (126 MHz, DMSO-*d*<sub>6</sub>)  $\delta$  175.4, 168.4, 139.1, 137.0, 136.6, 136.2, 129.6, 129.3, 128.6, 128.4, 128.0, 126.6, 55.1, 24.5, 20.7. HRMS (ESI)[M+Na]<sup>+</sup> calcd for C<sub>18</sub>H<sub>19</sub>NNaO<sub>3</sub>: 320.1257, found: 320.1266.

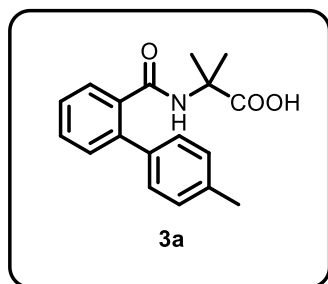

**2-(3,4'-dimethyl-[1,1'-biphenyl]-2-ylcarboxamido)-2-methylpropanoic acid (3b)**

Compound **3b** was prepared as described in general procedure for Ni(II)-catalyzed mono-selective ortho-arylation of unactivated aryl C-H bonds. White solid, 40.2 mg, 64% yield. Mp: 195-197°C. <sup>1</sup>H NMR (500 MHz, DMSO-*d*<sub>6</sub>) δ 8.34 (s, 1H), 7.32 (dd, *J* = 7.8, 6.4 Hz, 3H), 7.22 – 7.11 (m, 4H), 2.36 (s, 3H), 2.32 (s, 3H), 1.16 (s, 6H). <sup>13</sup>C NMR (126 MHz, DMSO-*d*<sub>6</sub>) δ 175.9, 168.2, 139.3, 137.8, 137.3, 136.5, 135.5, 129.1, 129.0, 128.8, 128.6, 127.2, 55.33, 24.8, 21.1, 19.4. HRMS (ESI)[M+H]<sup>+</sup>calcd for C<sub>19</sub>H<sub>22</sub>NO<sub>3</sub>: 312.1594, found: 312.1589.

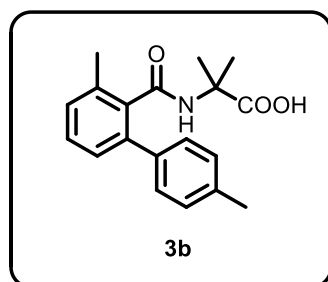

**2-methyl-2-(4'-methyl-4-(trifluoromethyl)-[1,1'-biphenyl]-2-ylcarboxamido)propanoic acid (3c)**

Compound **3c** was prepared as described in general procedure for Ni(II)-catalyzed mono-selective ortho-arylation of unactivated aryl C-H bonds. White solid, 50.2 mg, 68% yield. Mp: 242-245°C. <sup>1</sup>H NMR (500 MHz, DMSO-*d*<sub>6</sub>) δ 8.72 (s, 1H), 7.86 (d, *J* = 8.2 Hz, 1H), 7.66 – 7.63 (m, 2H), 7.40 (d, *J* = 8.0 Hz, 2H), 7.24 (d, *J* = 7.9 Hz, 2H), 2.35 (s, 3H), 1.35 (s, 6H). <sup>13</sup>C NMR (126 MHz, DMSO-*d*<sub>6</sub>) δ 175.6, 167.5, 143.8, 137.8, 137.7, 136.0, 131.2, 129.3, 128.9, 127.5 (q, *J* = 32.2 Hz), 126.5, 125.0, 124.5 (q, *J* = 272.2 Hz), 55.8, 24.9, 21.2. HRMS (ESI)[M+H]<sup>+</sup>calcd for C<sub>19</sub>H<sub>19</sub>F<sub>3</sub>NO<sub>3</sub>: 366.1312, found: 366.1320.

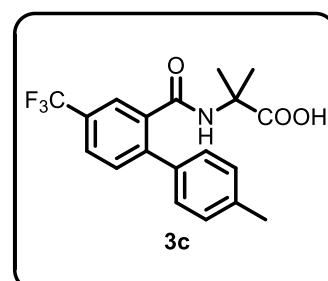

**2-(4,4'-dimethyl-[1,1'-biphenyl]-2-ylcarboxamido)-2-methylpropanoic acid (3d)**

Compound **3d** was prepared as described in general procedure for Ni(II)-catalyzed mono-selective ortho-arylation of unactivated aryl C-H bonds. White solid, 49.1 mg, 78% yield. Mp:

197-201°C. **<sup>1</sup>H NMR** (500 MHz, DMSO-*d*<sub>6</sub>) δ 8.37 (s, 1H), 7.28 (dd, *J* = 13.6, 6.0 Hz, 4H), 7.18 (s, 1H), 7.14 (d, *J* = 7.9 Hz, 2H), 2.35 (s, 3H), 2.30 (s, 3H), 1.30 (s, 6H). **<sup>13</sup>C NMR** (126 MHz, DMSO-*d*<sub>6</sub>) δ 175.5, 168.4, 136.9, 136.5, 136.3, 136.0, 135.9, 129.9, 129.6, 128.4, 128.4, 128.4, 55.1, 24.5, 20.7, 20.4. **HRMS** (ESI)[M+H]<sup>+</sup> calcd for C<sub>19</sub>H<sub>22</sub>NO<sub>3</sub>: 312.1594, found: 312.1593.

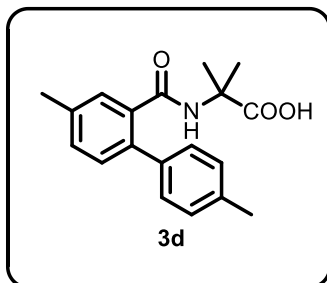

**2-(4-methoxy-4'-methyl-[1,1'-biphenyl]-2-ylcarboxamido)-2-methylpropanoic acid (3e)**

Compound **3e** was prepared as described in general procedure for Ni(II)-catalyzed mono-selective ortho-arylation of unactivated aryl C-H bonds. White solid, 33.7 mg, 51% yield. Mp: 203-205°C. **<sup>1</sup>H NMR** (500 MHz, DMSO-*d*<sub>6</sub>) δ 8.34 (s, 1H), 7.31 (d, *J* = 8.6 Hz, 1H), 7.28 (d, *J* = 7.9 Hz, 2H), 7.15 (d, *J* = 7.9 Hz, 2H), 7.06 (dd, *J* = 8.5, 2.5 Hz, 1H), 6.91 (d, *J* = 2.5 Hz, 1H), 3.82 (s, 3H), 2.31 (s, 3H), 1.32 (s, 6H). **<sup>13</sup>C NMR** (126 MHz, DMSO-*d*<sub>6</sub>) δ 175.9, 168.4, 158.3, 138.1, 137.2, 136.1, 132.11, 131.4, 129.0, 128.8, 115.2, 114.0, 55.8, 55.7, 24.9, 21.1. **HRMS** (ESI)[M-H]<sup>-</sup> calcd for C<sub>19</sub>H<sub>20</sub>NO<sub>4</sub>: 326.1398, found: 326.1395.

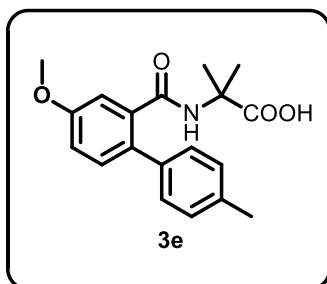

**2-(5-fluoro-4'-methyl-[1,1'-biphenyl]-2-ylcarboxamido)-2-methylpropanoic acid (3f)**

Compound **3f** was prepared as described in general procedure for Ni(II)-catalyzed mono-selective ortho-arylation of unactivated aryl C-H bonds. White solid, 49.1 mg, 77% yield. Mp: 193-195°C. **<sup>1</sup>H NMR** (500 MHz, DMSO-*d*<sub>6</sub>) δ 8.44 (s, 1H), 7.43 (dd, *J* = 7.9, 6.4 Hz, 1H), 7.35 (d, *J* = 8.0 Hz, 2H), 7.23 (dd, *J* = 13.3, 5.9 Hz, 2H), 7.19 (d, *J* = 7.9 Hz, 2H), 2.33 (s, 3H), 1.31 (s, 6H). **<sup>13</sup>C NMR** (126 MHz, DMSO-*d*<sub>6</sub>) δ 175.8, 168.0, 162.6 (d, *J* = 246.2 Hz), 142.4 (d, *J* = 8.1 Hz), 137.4, 136.3, 133.6 (d, *J* = 2.7 Hz), 130.8 (d, *J* = 8.7 Hz), 129.2, 128.9, 116.6 (d, *J* = 21.8 Hz), 113.8 (d, *J* = 21.3 Hz), 55.6, 24.9, 21.2. **HRMS** (ESI)[M-H]<sup>-</sup> calcd for C<sub>18</sub>H<sub>17</sub>FO<sub>3</sub>: 314.1198, found: 314.1197.

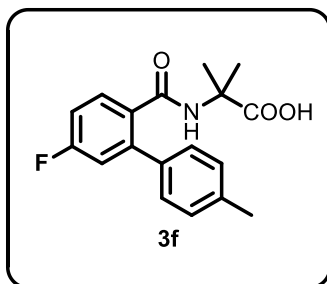

### 2-(5-chloro-4'-methyl-[1,1'-biphenyl]-2-ylcarboxamido)-2-methylpropanoic acid (3g)

Compound **3g** was prepared as described in general procedure for Ni(II)-catalyzed mono-selective ortho-arylation of unactivated aryl C-H bonds. White solid, 44.2 mg, 66% yield. Mp: 167-170°C. <sup>1</sup>H NMR (500 MHz, DMSO-*d*<sub>6</sub>) δ 8.52 (s, 1H), 7.47 (dd, *J* = 8.1, 2.1 Hz, 1H), 7.43 (d, *J* = 2.1 Hz, 1H), 7.40 (d, *J* = 8.2 Hz, 1H), 7.35 (d, *J* = 8.1 Hz, 2H), 7.19 (d, *J* = 7.9 Hz, 2H), 2.33 (s, 3H), 1.30 (s, 6H). <sup>13</sup>C NMR (126 MHz, DMSO-*d*<sub>6</sub>) δ 137.0, 129.9, 129.1, 128.8, 128.4, 126.5, 55.1, 24.5, 20.7. HRMS (ESI)[M-H]<sup>-</sup>calcd for C<sub>18</sub>H<sub>17</sub>ClNO<sub>3</sub>: 330.0902, found: 330.0901.

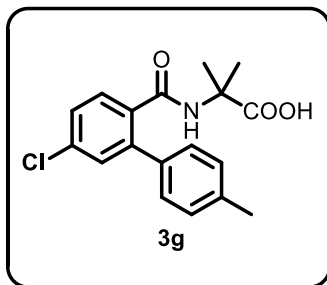

### 2-(5-bromo-4'-methyl-[1,1'-biphenyl]-2-ylcarboxamido)-2-methylpropanoic acid (3h)

Compound **3h** was prepared as described in general procedure for Ni(II)-catalyzed mono-selective ortho-arylation of unactivated aryl C-H bonds. White solid, 48.5 mg, 64% yield. Mp: 177-179°C. <sup>1</sup>H NMR (500 MHz, DMSO-*d*<sub>6</sub>) δ 8.51 (s, 1H), 7.61 (dd, *J* = 8.1, 2.0 Hz, 1H), 7.56 (d, *J* = 2.0 Hz, 1H), 7.34 (dd, *J* = 8.1, 5.0 Hz, 3H), 7.19 (d, *J* = 7.9 Hz, 2H), 2.33 (s, 3H), 1.30 (s, 6H). <sup>13</sup>C NMR (126 MHz, DMSO-*d*<sub>6</sub>) δ 175.3, 167.5, 141.5, 137.0, 135.7, 135.5, 131.9, 130.1, 129.5, 128.8, 128.4, 122.4, 55.2, 24.5, 20.7. HRMS (ESI)[M+H]<sup>+</sup>calcd for C<sub>18</sub>H<sub>19</sub>BrNO<sub>3</sub>: 376.0543, found: 376.0541.

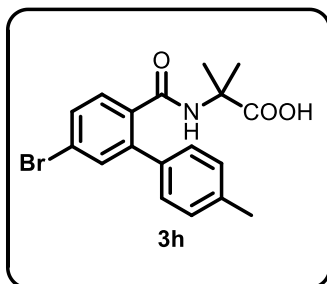

### 2-methyl-2-(4'-methyl-5-nitro-[1,1'-biphenyl]-2-ylcarboxamido)propanoic acid (3i)

Compound **3i** was prepared as described in general procedure for Ni(II)-catalyzed mono-selective ortho-arylation of unactivated aryl C-H bonds. White solid, 51.9 mg, 75% yield. Mp: 206-208°C. <sup>1</sup>H NMR (500 MHz, DMSO-*d*<sub>6</sub>) δ 8.28 (s, 1H), 7.80 (dd, *J* = 8.3, 1.9 Hz, 1H), 7.70 (d, *J* = 1.8 Hz, 1H), 7.18 (d, *J* = 8.4 Hz, 1H), 6.98 (d, *J* = 7.9 Hz, 2H), 6.79 (d, *J* = 7.8 Hz, 2H), 1.90 (s, 3H), 0.88 (s, 6H). <sup>13</sup>C NMR (126 MHz, DMSO-*d*<sub>6</sub>) δ 175.6, 167.2, 148.2, 142.9, 141.0, 138.0, 135.3, 130.0, 129.4, 128.9, 124.5, 122.2, 55.9, 24.9, 21.2. HRMS (ESI)[M+H]<sup>+</sup>calcd for C<sub>18</sub>H<sub>19</sub>N<sub>2</sub>O<sub>5</sub>: 343.1288, found: 343.1290.

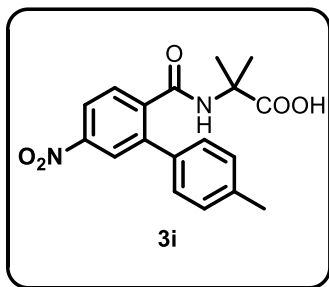

### 2-(4',5-dimethyl-[1,1'-biphenyl]-2-ylcarboxamido)-2-methylpropanoic acid (**3j**)

Compound **3j** was prepared as described in general procedure for Ni(II)-catalyzed mono-selective ortho-arylation of unactivated aryl C-H bonds. White solid, 48.4 mg, 77% yield. Mp: 192-194°C. <sup>1</sup>H NMR (500 MHz, DMSO-*d*<sub>6</sub>) δ 8.30 (s, 1H), 7.31 (dd, *J* = 8.0, 6.2 Hz, 3H), 7.18 (dd, *J* = 13.9, 6.7 Hz, 4H), 2.37 (s, 3H), 2.32 (s, 3H), 1.31 (s, 6H). <sup>13</sup>C NMR (126 MHz, DMSO-*d*<sub>6</sub>) δ 175.5, 168.4, 139.2, 138.9, 137.1, 136.1, 133.9, 130.2, 128.6, 128.4, 128.1, 127.1, 55.0, 24.5, 20.8, 20.7. HRMS (ESI)[M+H]<sup>+</sup> calcd for C<sub>19</sub>H<sub>22</sub>NO<sub>3</sub>: 312.1594, found: 312.1594.

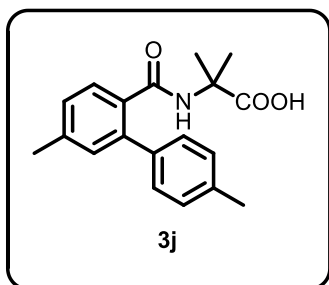

### 2-(5-(tert-butyl)-4'-methyl-[1,1'-biphenyl]-2-ylcarboxamido)-2-methylpropanoic acid (**3k**)

Compound **3j** was prepared as described in general procedure for Ni(II)-catalyzed mono-selective ortho-arylation of unactivated aryl C-H bonds. White solid, 54.3 mg, 76% yield. Mp: 199-202°C. <sup>1</sup>H NMR (500 MHz, DMSO-*d*<sub>6</sub>) δ 8.31 (s, 1H), 7.42 (dd, *J* = 8.1, 1.9 Hz, 1H), 7.33 (dd, *J* = 5.0, 2.9 Hz, 4H), 7.18 (d, *J* = 7.9 Hz, 2H), 2.33 (s, 3H), 1.32 (s, 9H), 1.30 (s, 6H). <sup>13</sup>C NMR (126 MHz, DMSO-*d*<sub>6</sub>) δ 175.9, 168.9, 152.3, 139.3, 137.9, 136.6, 134.6, 129.1, 129.0, 128.3, 126.9, 124.0, 55.5, 34.9, 31.4, 25.0, 21.1. HRMS (ESI)[M+H]<sup>+</sup> calcd for C<sub>22</sub>H<sub>28</sub>NO<sub>3</sub>: 354.2064, found: 354.2067.

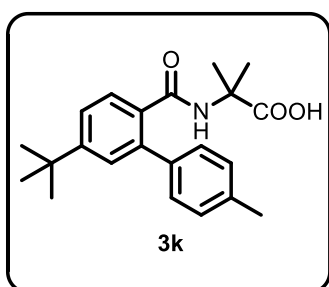

### 2-methyl-2-(4'-methyl-5-vinyl-[1,1'-biphenyl]-2-ylcarboxamido)propanoic acid (**3l**)

Compound **3l** was prepared as described in general procedure for Ni(II)-catalyzed mono-selective ortho-arylation of unactivated aryl C-H bonds. White solid, 49.7 mg, 76% yield. Mp: 123-126°C. <sup>1</sup>H NMR (500 MHz, DMSO-*d*<sub>6</sub>) δ 8.39 (s, 1H), 7.51 (d, *J* = 7.9 Hz, 1H), 7.45 (d, *J* = 1.5 Hz, 1H), 7.37 (dd, *J* = 15.3, 8.0 Hz, 3H), 7.19 (d, *J* = 7.9 Hz, 2H), 6.81 (dd, *J* = 17.7, 11.0 Hz, 1H), 5.94 (d, *J* = 17.6 Hz, 1H), 5.34 (d, *J* = 11.5 Hz, 1H), 2.33 (s, 3H), 1.31 (s, 6H).

**$^{13}\text{C}$  NMR** (126 MHz,  $\text{DMSO}-d_6$ )  $\delta$  175.4, 168.2, 139.6, 138.1, 136.9, 136.4, 136.0, 136.0, 128.6, 128.5, 128.4, 127.6, 124.0, 115.6, 55.1, 24.5, 20.7. **HRMS** (ESI)[ $\text{M}+\text{H}$ ] $^+$ calcd for  $\text{C}_{20}\text{H}_{22}\text{NO}_3$ : 324.1594, found: 324.1599.

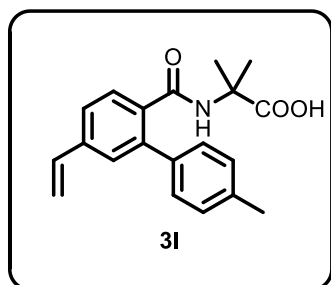

**2-methyl-2-(4''-methyl-[1,1':3',1''-terphenyl]-4'-ylcarboxamido)propanoic acid (3m)**

Compound **3m** was prepared as described in general procedure for Ni(II)-catalyzed mono-selective ortho-arylation of unactivated aryl C-H bonds. White solid, 55.8 mg, 74% yield. Mp: 188-191°C.  **$^1\text{H}$  NMR** (500 MHz,  $\text{DMSO}-d_6$ )  $\delta$  8.46 (s, 1H), 7.74 (d,  $J$  = 7.4 Hz, 2H), 7.68 (dd,  $J$  = 7.9, 1.5 Hz, 1H), 7.62 (s, 1H), 7.52 – 7.47 (m, 3H), 7.44 (d,  $J$  = 8.0 Hz, 2H), 7.40 (t,  $J$  = 7.3 Hz, 1H), 7.20 (d,  $J$  = 7.8 Hz, 2H), 2.34 (s, 3H), 1.34 (s, 6H).  **$^{13}\text{C}$  NMR** (126 MHz,  $\text{DMSO}-d_6$ )  $\delta$  175.9, 168.7, 141.7, 140.3, 139.9, 137.4, 136.9, 136.1, 129.5, 129.3, 129.1, 129.0, 128.4, 128.3, 127.4, 125.4, 55.6, 25.0, 21.2. **HRMS** (ESI)[ $\text{M}-\text{H}$ ] $^-$ calcd for  $\text{C}_{24}\text{H}_{24}\text{NO}_3$ : 372.1605, found: 372.1595.

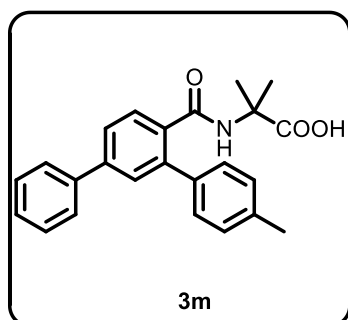

**2-methyl-2-(3-(p-tolyl)-2-naphthamido)propanoic acid (3n)**

Compound **3n** was prepared as described in general procedure for Ni(II)-catalyzed mono-selective ortho-arylation of unactivated aryl C-H bonds. White solid, 42.1 mg, 60% yield. Mp: 247-250°C.  **$^1\text{H}$  NMR** (500 MHz,  $\text{DMSO}-d_6$ )  $\delta$  8.70 (s, 1H), 8.27 – 8.24 (m, 1H), 8.00 (d,  $J$  = 8.4 Hz, 1H), 7.99 – 7.96 (m, 1H), 7.57 – 7.54 (m, 2H), 7.50 (d,  $J$  = 8.5 Hz, 1H), 7.45 (d,  $J$  = 8.1 Hz, 2H), 7.23 (d,  $J$  = 7.9 Hz, 2H), 2.35 (s, 3H), 1.23 (s, 6H).  **$^{13}\text{C}$  NMR** (126 MHz,  $\text{DMSO}-d_6$ )  $\delta$  175.5, 167.5, 137.2, 136.5, 135.6, 133.9, 131.8, 130.5, 128.9, 128.6, 128.4, 127.9, 127.6, 126.6, 126.0, 125.9, 55.1, 20.7, 19.3. **HRMS** (ESI)[ $\text{M}+\text{H}$ ] $^+$ calcd for  $\text{C}_{22}\text{H}_{22}\text{NO}_3$ : 348.1594, found: 348.1596.

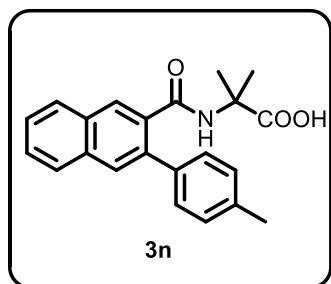

**2-methyl-2-(3-(p-tolyl)thiophene-2-carboxamido)propanoic acid (3o)**

Compound **3o** was prepared as described in general procedure for Ni(II)-catalyzed mono-selective ortho-arylation of unactivated aryl C-H bonds. White solid, 25.8 mg, 42% yield. Mp: 140-142°C. **<sup>1</sup>H NMR** (500 MHz, DMSO-*d*<sub>6</sub>) δ 7.91 (s, 1H), 7.68 (d, *J* = 5.1 Hz, 1H), 7.41 (d, *J* = 8.1 Hz, 2H), 7.21 (s, 1H), 7.19 (d, *J* = 5.0 Hz, 2H), 2.33 (s, 3H), 1.32 (s, 6H). **<sup>13</sup>C NMR** (126 MHz, DMSO-*d*<sub>6</sub>) δ 175.2, 161.8, 141.3, 136.9, 132.6, 131.9, 129.6, 128.9, 128.5, 127.1, 55.6, 24.4, 20.7. **HRMS** (ESI)[M+H]<sup>+</sup>calcd for C<sub>16</sub>H<sub>18</sub>NO<sub>3</sub>S: 304.1002, found: 304.1009.

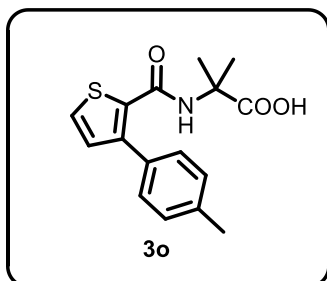

### 3-methyl-2-(4'-methyl-[1,1'-biphenyl]-2-ylcarboxamido)pentanoic acid (**3p**)

Compound **3p** was prepared as described in general procedure for Ni(II)-catalyzed mono-selective ortho-arylation of unactivated aryl C-H bonds. White solid, 19.6 mg, 30% yield. Mp: 97-101°C. **<sup>1</sup>H NMR** (500 MHz, DMSO-*d*<sub>6</sub>) δ 7.48 (ddd, *J* = 8.8, 4.6, 2.9 Hz, 1H), 7.39 (d, *J* = 3.9 Hz, 2H), 7.35 (d, *J* = 7.6 Hz, 1H), 7.30 (d, *J* = 8.0 Hz, 2H), 7.16 (d, *J* = 7.8 Hz, 2H), 4.08 (dd, *J* = 8.0, 6.2 Hz, 1H), 2.31 (s, 3H), 1.75 – 1.71 (m, 1H), 1.30 – 1.25 (m, 2H), 0.77 (d, *J* = 7.4 Hz, 3H), 0.75 (d, *J* = 4.6 Hz, 3H). **<sup>13</sup>C NMR** (126 MHz, DMSO-*d*<sub>6</sub>) δ 172.9, 169.0, 139.1, 137.3, 136.9, 136.3, 129.6, 129.3, 128.7, 128.3, 127.9, 127.8, 126.7, 57.1, 36.0, 24.6, 20.6, 19.3, 15.5, 11.2. **HRMS** (ESI)[M-H]<sup>-</sup>calcd for C<sub>20</sub>H<sub>22</sub>NO<sub>3</sub>: 324.1605, found: 324.1601.

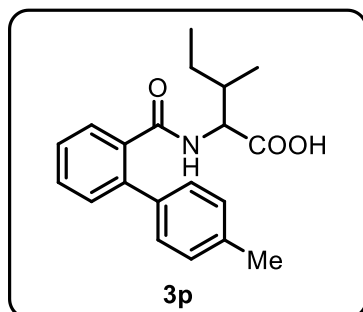

### 2-(4'-methyl-[1,1'-biphenyl]-2-ylcarboxamido)propanoic acid (**3q**)

Compound **3q** was prepared as described in general procedure for Ni(II)-catalyzed mono-selective ortho-arylation of unactivated aryl C-H bonds. White solid, 19.6 mg, 30% yield. Mp: 97-101°C. **<sup>1</sup>H NMR** (500 MHz, DMSO-*d*<sub>6</sub>) δ 7.51 – 7.47 (m, 1H), 7.44 – 7.36 (m, 3H), 7.32 (d, *J* = 8.0 Hz, 2H), 7.17 (d, *J* = 7.9 Hz, 2H), 4.20 – 4.13 (m, 1H), 2.32 (s, 3H), 1.20 (d, *J* = 7.3 Hz, 3H). **<sup>13</sup>C NMR** (126 MHz, DMSO-*d*<sub>6</sub>) δ 173.8, 168.6, 139.2, 137.1, 136.5, 136.2, 129.7, 129.4, 128.6, 128.3, 127.9, 126.6, 48.0, 20.6, 16.9. **HRMS** (ESI)[M-H]<sup>-</sup>calcd for C<sub>17</sub>H<sub>16</sub>NO<sub>3</sub>Ion(M-H): 282.1136, found: 282.1132.



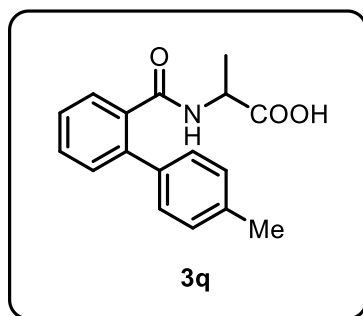

#### 2-(4'-(tert-butyl)-[1,1'-biphenyl]-2-ylcarboxamido)-2-methylpropanoic acid (4a)

Compound **4a** was prepared as described in general procedure for Ni(II)-catalyzed mono-selective ortho-arylation of unactivated aryl C-H bonds. White solid, 54.8 mg, 80% yield. Mp: 181-184°C. <sup>1</sup>H NMR (500 MHz, DMSO-*d*<sub>6</sub>) δ 8.34 (s, 1H), 7.51 – 7.46 (m, 1H), 7.42 – 7.37 (m, 7H), 1.32 (s, 9H), 1.30 (s, 6H). <sup>13</sup>C NMR (126 MHz, DMSO-*d*<sub>6</sub>) δ 175.9, 168.8, 149.9, 139.6, 137.4, 137.1, 130.1, 129.8, 128.7, 128.5, 127.1, 125.2, 55.5, 34.6, 31.6, 24.9. HRMS (ESI)[M+H]<sup>+</sup> calcd for C<sub>21</sub>H<sub>26</sub>NO<sub>3</sub>: 340.1907, found: 340.1905.

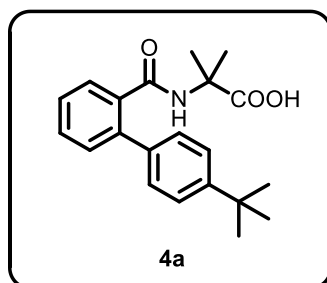

#### 2-(4'-methoxy-[1,1'-biphenyl]-2-ylcarboxamido)-2-methylpropanoic acid (4b)

Compound **4b** was prepared as described in general procedure for Ni(II)-catalyzed mono-selective ortho-arylation of unactivated aryl C-H bonds. White solid, 41.8 mg, 66% yield. Mp: 177-180°C. <sup>1</sup>H NMR (500 MHz, DMSO-*d*<sub>6</sub>) δ 7.49 – 7.45 (m, 1H), 7.40 – 7.35 (m, 5H), 6.93 (d, *J* = 8.6 Hz, 2H), 3.78 (s, 3H), 1.32 (s, 6H). <sup>13</sup>C NMR (126 MHz, DMSO-*d*<sub>6</sub>) δ 175.9, 168.9, 168.8, 159.0, 139.3, 137.0, 137.0, 132.6, 130.2, 130.0, 129.8, 128.5, 126.8, 114.2, 55.5, 55.4, 25.0. HRMS (ESI)[M+H]<sup>+</sup> calcd for C<sub>18</sub>H<sub>20</sub>NO<sub>4</sub>: 314.1387, found: 314.1391.

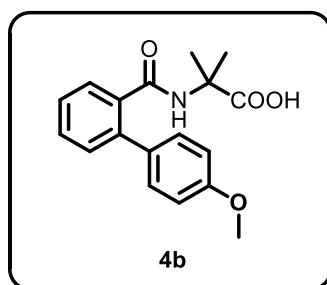

#### 2-(4'-(methoxycarbonyl)-[1,1'-biphenyl]-2-ylcarboxamido)-2-methylpropanoic acid (4c)

Compound **4c** was prepared as described in general procedure for Ni(II)-catalyzed mono-selective ortho-arylation of unactivated aryl C-H bonds. White solid, 52.4 mg, 76% yield. Mp: 178-180°C. <sup>1</sup>H NMR (500 MHz, DMSO-*d*<sub>6</sub>) δ 8.55 (s, 1H), 7.96 (d, *J* = 8.4 Hz, 2H), 7.58 (d, *J* = 8.4 Hz, 2H), 7.56 – 7.52 (m, 1H), 7.49 – 7.45 (m, 3H), 3.87 (s, 3H), 1.31 (s, 6H). <sup>13</sup>C NMR (126 MHz, DMSO-*d*<sub>6</sub>) δ 175.4, 168.0, 166.1, 144.8, 144.7, 138.2, 136.8, 129.8, 129.6, 129.0, 128.9, 128.2, 128.1,

127.7, 55.2, 52.1, 24.5. **HRMS** (ESI)[M+H]<sup>+</sup>calcdfor C<sub>19</sub>H<sub>20</sub>NO<sub>5</sub>: 342.1336, found: 342.1334.

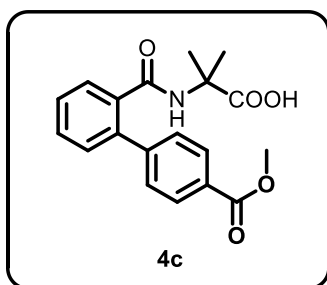

**2-(4'-fluoro-[1,1'-biphenyl]-2-ylcarboxamido)-2-methylpropanoic acid (4d)**

Compound **4d** was prepared as described in general procedure for Ni(II)-catalyzed mono-selective ortho-arylation of unactivated aryl C-H bonds. White solid, 45.1 mg, 74% yield. Mp: 198-201°C. <sup>1</sup>H NMR (500 MHz, DMSO-*d*<sub>6</sub>) δ 8.43 (s, 1H), 7.52 – 7.38 (m, 6H), 7.19 (t, *J* = 8.9 Hz, 2H), 1.30 (s, 6H). <sup>13</sup>C NMR (126 MHz, DMSO-*d*<sub>6</sub>) δ 175.8, 168.6, 162.1 (d, *J* = 243.7 Hz), 138.6, 137.3, 136.7 (d, *J* = 2.8 Hz), 131.0 (d, *J* = 8.2 Hz), 130.1, 129.9, 128.4, 127.5, 115.3 (d, *J* = 21.3 Hz), 55.6, 24.9. **HRMS** (ESI)[M+H]<sup>+</sup>calcdfor C<sub>17</sub>H<sub>17</sub>FNO<sub>3</sub>: 302.1187, found: 302.1192.

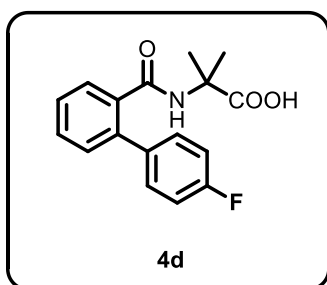

**2-(4'-chloro-[1,1'-biphenyl]-2-ylcarboxamido)-2-methylpropanoic acid (4e)**

Compound **4e** was prepared as described in general procedure for Ni(II)-catalyzed mono-selective ortho-arylation of unactivated aryl C-H bonds. White solid, 42.3 mg, 66% yield. Mp: 212-214°C. <sup>1</sup>H NMR (500 MHz, DMSO-*d*<sub>6</sub>) δ 8.50 (s, 1H), 7.51 (ddd, *J* = 7.6, 6.2, 2.8 Hz, 1H), 7.46 – 7.40 (m, 7H), 1.32 (s, 6H). <sup>13</sup>C NMR (126 MHz, DMSO-*d*<sub>6</sub>) δ 175.8, 168.5, 139.2, 138.4, 137.2, 132.5, 130.8, 130.1, 130.0, 128.6, 128.5, 127.7, 55.7, 24.9. **HRMS** (ESI)[M+H]<sup>+</sup>calcdfor C<sub>17</sub>H<sub>17</sub>ClNO<sub>3</sub>: 318.0891, found: 318.0889.

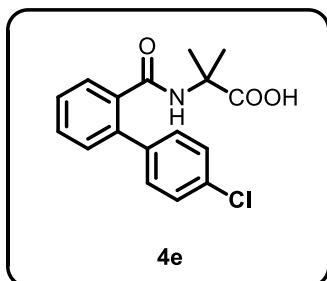

**2-(4'-bromo-[1,1'-biphenyl]-2-ylcarboxamido)-2-methylpropanoic acid (4f)**

Compound **4f** was prepared as described in general procedure for Ni(II)-catalyzed mono-selective ortho-arylation of unactivated aryl C-H bonds. White solid, 50.4 mg, 69% yield. Mp: 222-225°C. <sup>1</sup>H NMR (500 MHz, DMSO-*d*<sub>6</sub>) δ 7.57 – 7.55 (m, 2H), 7.53 – 7.50 (m, 1H), 7.46 – 7.40

(m, 3H), 7.40 – 7.37 (m, 2H), 1.32 (s, 6H). **<sup>13</sup>C NMR** (126 MHz, DMSO-*d*<sub>6</sub>) δ 175.3, 168.1, 139.1, 138.1, 136.6, 136.5, 130.9, 130.7, 129.6, 128.2, 127.3, 120.6, 55.1, 24.5. **HRMS** (ESI)[M-H]<sup>-</sup>calcd for C<sub>17</sub>H<sub>15</sub>BrNO<sub>3</sub>: 360.0241, found:360.0237.

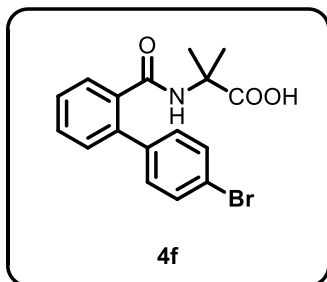

#### 2-methyl-2-(3'-methyl-[1,1'-biphenyl]-2-ylcarboxamido)propanoic acid (**4g**)

Compound **4g** was prepared as described in general procedure for Ni(II)-catalyzed mono-selective ortho-arylation of unactivated aryl C-H bonds. White solid, 45.1 mg, 75% yield. Mp: 178-181 °C. **<sup>1</sup>H NMR** (500 MHz, DMSO-*d*<sub>6</sub>) δ 8.33 (s, 1H), 7.48 (dd, *J* = 7.5, 4.0 Hz, 1H), 7.39 (t, *J* = 6.7 Hz, 3H), 7.26 (dd, *J* = 15.6, 8.2 Hz, 3H), 7.14 (d, *J* = 7.2 Hz, 1H), 2.32 (s, 3H), 1.29 (s, 6H). **<sup>13</sup>C NMR** (126 MHz, DMSO-*d*<sub>6</sub>) δ 175.8, 168.7, 140.3, 139.7, 137.4, 137.3, 130.1, 129.8, 129.6, 128.5, 128.4, 128.2, 127.3, 126.1, 55.6, 24.9, 21.4. **HRMS** (ESI)[M+H]<sup>+</sup>calcd for C<sub>18</sub>H<sub>20</sub>NO<sub>3</sub>: 298.1438, found:298.1440.

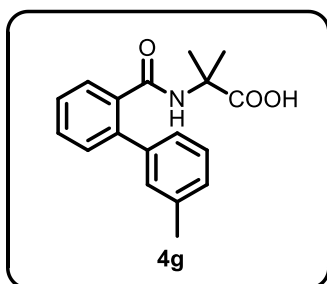

#### 2-(3'-methoxy-[1,1'-biphenyl]-2-ylcarboxamido)-2-methylpropanoic acid (**4h**)

Compound **4h** was prepared as described in general procedure for Ni(II)-catalyzed mono-selective ortho-arylation of unactivated aryl C-H bonds. White solid, 43.7 mg, 69% yield. Mp: 196-198 °C. **<sup>1</sup>H NMR** (500 MHz, DMSO-*d*<sub>6</sub>) δ 8.37 (s, 1H), 7.49 (dd, *J* = 10.2, 4.6 Hz, 1H), 7.41 (dd, *J* = 15.1, 7.9 Hz, 3H), 7.28 (t, *J* = 7.9 Hz, 1H), 6.99 (d, *J* = 7.7 Hz, 1H), 6.96 (s, 1H), 6.90 (dd, *J* = 8.2, 2.1 Hz, 1H), 3.77 (s, 3H), 1.27 (s, 6H). **<sup>13</sup>C NMR** (126 MHz, DMSO-*d*<sub>6</sub>) δ 175.4, 168.2, 158.9, 141.3, 139.1, 136.8, 129.7, 129.3, 129.0, 127.9, 127.0, 121.0, 114.0, 112.7, 55.0, 55.0, 24.5. **HRMS** (ESI)[M+H]<sup>+</sup>calcd for C<sub>18</sub>H<sub>20</sub>NO<sub>4</sub>: 314.1387, found:314.1393.

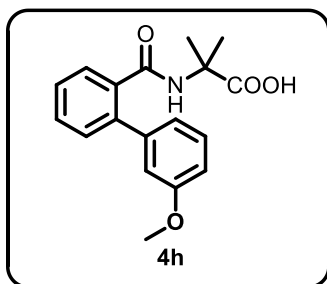

### 2-(3'-bromo-[1,1'-biphenyl]-2-ylcarboxamido)-2-methylpropanoic acid (4i)

Compound **4i** was prepared as described in general procedure for Ni(II)-catalyzed mono-selective ortho-arylation of unactivated aryl C-H bonds. White solid, 46.7 mg, 64% yield. Mp: 202-205°C. **<sup>1</sup>H NMR** (500 MHz, DMSO-*d*<sub>6</sub>) δ 8.47 (s, 1H), 7.57 (s, 1H), 7.52 (dd, *J* = 14.6, 7.6 Hz, 2H), 7.44 (dd, *J* = 21.0, 7.2 Hz, 4H), 7.35 (t, *J* = 7.8 Hz, 1H), 1.31 (s, 6H). **<sup>13</sup>C NMR** (126 MHz, DMSO-*d*<sub>6</sub>) δ 175.7, 168.4, 142.8, 138.0, 137.3, 131.4, 130.7, 130.4, 130.1, 130.0, 128.4, 128.2, 128.0, 121.8, 55.7, 25.0. **HRMS** (ESI)[M+H]<sup>+</sup> calcd for C<sub>17</sub>H<sub>17</sub>BrNO<sub>3</sub>: 362.0386, found: 362.0390.

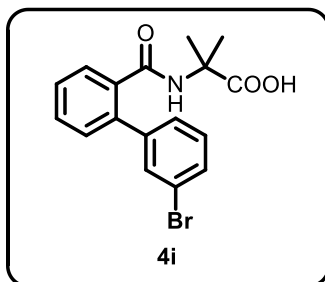

### 2-(3',4'-dimethyl-[1,1'-biphenyl]-2-ylcarboxamido)-2-methylpropanoic acid (4j)

Compound **4j** was prepared as described in general procedure for Ni(II)-catalyzed mono-selective ortho-arylation of unactivated aryl C-H bonds. White solid, 50.3 mg, 80% yield. Mp: 203-205°C. **<sup>1</sup>H NMR** (500 MHz, DMSO-*d*<sub>6</sub>) δ 8.35 (s, 1H), 7.49 – 7.44 (m, 1H), 7.39 – 7.35 (m, 3H), 7.20 (s, 1H), 7.15 (dd, *J* = 17.7, 8.0 Hz, 2H), 2.24 (s, 3H), 2.23 (s, 3H), 1.31 (s, 6H). **<sup>13</sup>C NMR** (126 MHz, DMSO-*d*<sub>6</sub>) δ 175.9, 168.8, 139.6, 137.9, 137.2, 136.1, 135.4, 130.0, 129.7, 129.7, 128.4, 127.0, 126.3, 55.6, 24.9, 19.8, 19.5. **HRMS** (ESI)[M+H]<sup>+</sup> calcd for C<sub>19</sub>H<sub>22</sub>NO<sub>3</sub>: 312.1594, found: 312.1602.

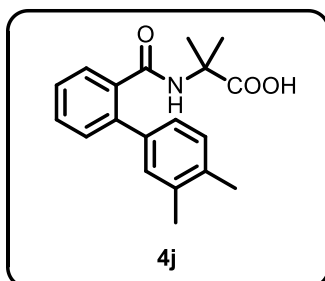

### 2-(3',5'-dimethyl-[1,1'-biphenyl]-2-ylcarboxamido)-2-methylpropanoic acid (4k)

Compound **4j** was prepared as described in general procedure for Ni(II)-catalyzed mono-selective ortho-arylation of unactivated aryl C-H bonds. White solid, 47.8 mg, 76% yield. Mp: 194-197°C. **<sup>1</sup>H NMR** (500 MHz, DMSO-*d*<sub>6</sub>) δ 8.31 (s, 1H), 7.49 – 7.45 (m, 1H), 7.40 – 7.36 (m, 3H), 7.03 (s, 2H), 6.96 (s, 1H), 2.28 (s, 6H), 1.31 (s, 6H). **<sup>13</sup>C NMR** (126 MHz, DMSO-*d*<sub>6</sub>) δ 175.8, 168.7, 140.3, 139.8, 137.4, 137.2, 130.1, 129.7, 128.9, 128.4, 127.2, 126.8, 55.6, 24.9, 21.3. **HRMS** (ESI)[M+H]<sup>+</sup> calcd for C<sub>19</sub>H<sub>22</sub>NO<sub>3</sub>: 312.1594, found: 312.1599.

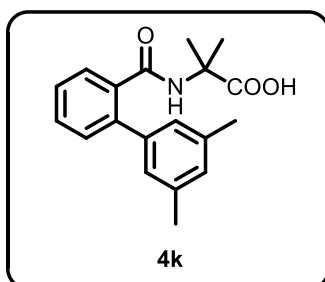

#### 2-methyl-2-(2-(thiophen-2-yl)benzamido)propanoic acid (4l)

Compound **4l** was prepared as described in general procedure for Ni(II)-catalyzed mono-selective ortho-arylation of unactivated aryl C-H bonds. White solid, 46.1 mg, 79% yield. Mp: 181-183°C. <sup>1</sup>H NMR (500 MHz, DMSO-*d*<sub>6</sub>) δ 8.54 (s, 1H), 7.55 (dd, *J* = 5.1, 0.8 Hz, 1H), 7.51 (d, *J* = 7.0 Hz, 1H), 7.46 (td, *J* = 7.5, 1.4 Hz, 1H), 7.39 (ddd, *J* = 4.3, 1.1, 0.6 Hz, 1H), 7.34 (dd, *J* = 7.5, 1.1 Hz, 1H), 7.30 (dd, *J* = 3.6, 1.0 Hz, 1H), 7.06 (dd, *J* = 5.0, 3.6 Hz, 1H), 1.36 (s, 6H). <sup>13</sup>C NMR (126 MHz, DMSO-*d*<sub>6</sub>) δ 175.8, 168.7, 141.3, 137.0, 131.7, 129.8, 128.6, 128.1, 127.7, 127.2, 126.7, 55.7, 25.0. HRMS (ESI)[M+H]<sup>+</sup> calcd for C<sub>15</sub>H<sub>16</sub>NO<sub>3</sub>S: 290.0845, found: 290.0852.

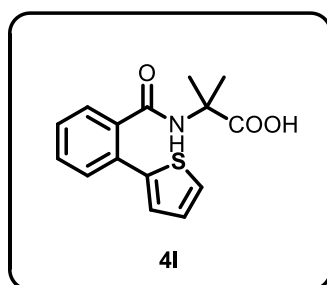

#### 2-(4'-cyano-[1,1'-biphenyl]-2-ylcarboxamido)-2-methylpropanoic acid (4m)

Compound **4m** was prepared as described in general procedure for Ni(II)-catalyzed mono-selective ortho-arylation of unactivated aryl C-H bonds. White solid, 21.2 mg, 34% yield. Mp: 219-222°C. <sup>1</sup>H NMR (500 MHz, DMSO-*d*<sub>6</sub>) δ 8.60 (s, 1H), 7.83 (d, *J* = 8.1 Hz, 2H), 7.61 (d, *J* = 8.2 Hz, 2H), 7.55 (t, *J* = 7.3 Hz, 1H), 7.48 (dt, *J* = 14.9, 7.4 Hz, 3H), 1.31 (s, 6H). <sup>13</sup>C NMR (126 MHz, DMSO-*d*<sub>6</sub>) δ 175.7, 168.3, 145.3, 138.2, 137.2, 132.4, 130.3, 130.2, 130.0, 128.7, 128.4, 119.3, 110.2, 55.7, 25.0. HRMS (ESI)[M+H]<sup>+</sup> calcd for C<sub>18</sub>H<sub>17</sub>N<sub>2</sub>O<sub>3</sub>: 309.1234, found: 309.1232.

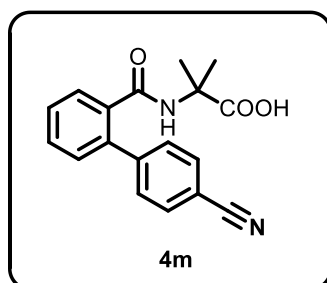

#### 2-methyl-2-(2-(5-methylthiophen-2-yl)benzamido)propanoic acid (4n)

Compound **4n** was prepared as described in general procedure for Ni(II)-catalyzed mono-selective ortho-arylation of unactivated aryl C-H bonds. White solid, 41.0 mg, 67% yield. Mp: 167-170°C. <sup>1</sup>H NMR (500 MHz, DMSO-*d*<sub>6</sub>) δ 8.55 (s, 1H), 7.43 (t, *J* = 6.6 Hz, 2H), 7.37 – 7.33 (m, 1H), 7.30 (d, *J* = 7.4 Hz, 1H), 7.10 (d, *J* = 3.4 Hz, 1H), 6.74 (d, *J* = 2.2 Hz, 1H), 2.45 (s, 3H), 1.37 (s, 6H). <sup>13</sup>C NMR (126 MHz, DMSO-*d*<sub>6</sub>) δ 175.8, 168.8, 140.1, 138.9, 136.6, 131.8, 129.7, 129.4, 128.6, 127.3, 127.0, 126.6, 55.6, 25.0, 15.3. HRMS (ESI)[M-H]<sup>-</sup> calcd for C<sub>16</sub>H<sub>16</sub>NO<sub>3</sub>S: 302.0856, found: 302.0853.

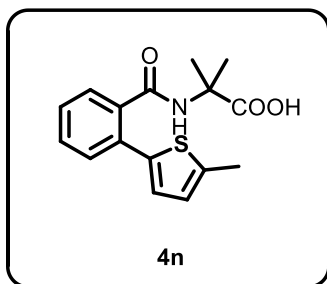

#### 2-(2-(5-acetylthiophen-2-yl)benzamido)-2-methylpropanoic acid (**4o**)

Compound **4o** was prepared as described in general procedure for Ni(II)-catalyzed mono-selective ortho-arylation of unactivated aryl C-H bonds. White solid, 48.8 mg, 73% yield. Mp: 222-224°C. **<sup>1</sup>H NMR** (500 MHz, DMSO-*d*<sub>6</sub>) δ 8.64 (s, 1H), 7.85 (d, *J* = 3.9 Hz, 1H), 7.57 (dd, *J* = 7.6, 1.0 Hz, 1H), 7.50 (dtd, *J* = 16.3, 7.3, 1.3 Hz, 3H), 7.40 (dd, *J* = 7.4, 1.3 Hz, 1H), 7.35 (d, *J* = 3.9 Hz, 1H), 2.53 (s, 3H), 1.37 (s, 6H). **<sup>13</sup>C NMR** (126 MHz, DMSO-*d*<sub>6</sub>) δ 191.1, 175.8, 168.2, 149.8, 144.0, 137.3, 134.5, 130.8, 130.1, 130.0, 129.1, 128.7, 128.5, 55.9, 26.8, 25.0. **HRMS** (ESI)[M+H]<sup>+</sup> calcd for C<sub>17</sub>H<sub>18</sub>NO<sub>4</sub>S: 332.0951, found: 332.0955.

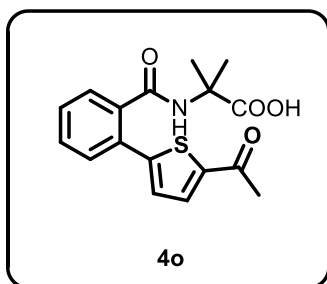

#### 2-(2-(5-(chlorocarbonyl)thiophen-2-yl)benzamido)-2-methylpropanoic acid (**4p**)

Compound **4p** was prepared as described in general procedure for Ni(II)-catalyzed mono-selective ortho-arylation of unactivated aryl C-H bonds. White solid, 43.9 mg, 62% yield. Mp: 175-178°C. **<sup>1</sup>H NMR** (500 MHz, DMSO-*d*<sub>6</sub>) δ 8.63 (s, 1H), 7.48 (d, *J* = 4.0 Hz, 2H), 7.45 – 7.41 (m, 1H), 7.36 (d, *J* = 7.4 Hz, 1H), 7.13 (d, *J* = 3.9 Hz, 1H), 7.07 (d, *J* = 3.9 Hz, 1H), 1.37 (s, 6H). **<sup>13</sup>C NMR** (126 MHz, DMSO-*d*<sub>6</sub>) δ 175.8, 168.3, 140.3, 136.9, 130.7, 130.0, 129.7, 128.7, 128.5, 128.3, 127.7, 127.0, 55.7, 25.0. **HRMS** (ESI)[M+H]<sup>+</sup> calcd for C<sub>16</sub>H<sub>15</sub>ClNO<sub>4</sub>S: 324.0456, found: 324.0457.

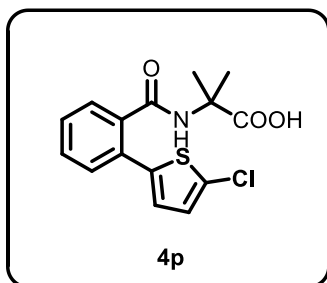

#### 2-(2-(5-bromothiophen-2-yl)benzamido)-2-methylpropanoic acid (**4q**)

Compound **4q** was prepared as described in general procedure for Ni(II)-catalyzed mono-selective ortho-arylation of unactivated aryl C-H bonds. White solid, 57.3 mg, 72% yield. Mp: 185-188°C. **<sup>1</sup>H NMR** (500 MHz, DMSO-*d*<sub>6</sub>) δ 8.65 (s, 1H), 7.48 (d, *J* = 3.7 Hz, 2H), 7.45 – 7.41 (m, 1H), 7.35 (d, *J* = 7.3 Hz, 1H), 7.17 (d, *J* = 3.9 Hz, 1H), 7.11 (d, *J* = 3.9 Hz, 1H), 1.37 (s, 6H). **<sup>13</sup>C NMR**

(126 MHz, DMSO-*d*<sub>6</sub>)  $\delta$  175.3, 167.9, 142.6, 136.4, 130.8, 130.3, 129.5, 129.2, 128.2, 127.9, 127.5, 111.3, 55.2, 24.6. **HRMS** (ESI)[M-H]<sup>-</sup>calcd for C<sub>15</sub>H<sub>13</sub>BrNO<sub>3</sub>S: 365.9805, found:365.9805.

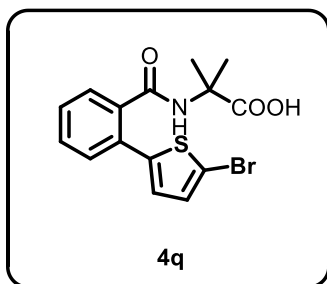

#### 2-(2-(5'-bromo-[2,2'-bithiophen]-5-yl)benzamido)-2-methylpropanoic acid (**4r**)

Compound **4r** was prepared as described in general procedure for Ni(II)-catalyzed mono-selective ortho-arylation of unactivated aryl C-H bonds. White solid, 65.2 mg, 72% yield. Mp: 206-209°C. **<sup>1</sup>H NMR** (500 MHz, DMSO-*d*<sub>6</sub>)  $\delta$  8.67 (s, 1H), 7.54 (d, *J* = 7.7 Hz, 1H), 7.48 (t, *J* = 7.5 Hz, 1H), 7.42 (t, *J* = 7.4 Hz, 1H), 7.36 (d, *J* = 7.5 Hz, 1H), 7.26 (d, *J* = 3.8 Hz, 1H), 7.25 – 7.23 (m, 2H), 7.16 (d, *J* = 3.8 Hz, 1H), 1.39 (s, 6H). **<sup>13</sup>C NMR** (126 MHz, DMSO-*d*<sub>6</sub>)  $\delta$  175.8, 168.5, 141.0, 138.4, 136.8, 135.7, 132.1, 130.9, 130.0, 129.5, 128.8, 128.2, 128.1, 125.5, 125.0, 110.7, 55.7, 25.1. **HRMS** (ESI)[M+H]<sup>+</sup>calcd for C<sub>19</sub>H<sub>17</sub>BrNO<sub>3</sub>S<sub>2</sub>: 449.9828, found:449.9839.

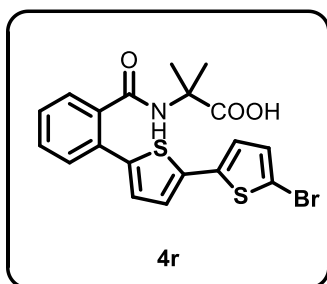

### 3. Mechanistic Investigations

#### H/D exchange experiments

The dry tube was charged with **1a** (0.2 mmol), Ni(OTf)<sub>2</sub> (10 mol%), MesCOOH (20 mol%), TBAI (0.6 mmol), Na<sub>2</sub>CO<sub>3</sub> (0.6 mmol) and D<sub>2</sub>O (2 mmol) were dissolved in DMSO (2 mL). The resulting mixture was stirred at 140 °C for 16 h. Then the solvent was removed under vacuum and <sup>1</sup>H NMR indicated that the H/D rate was greater than 95%

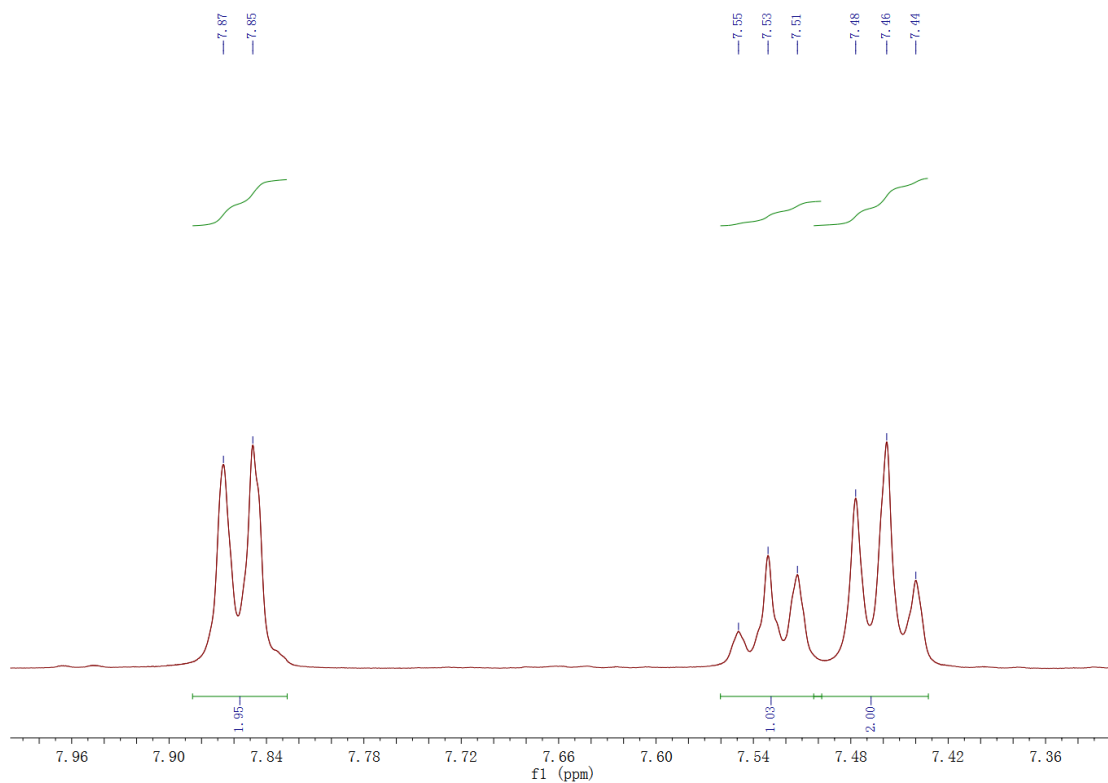

Scheme S1 H/D exchange experiment

### KIE experiments

A mixture of 2-benzamido-2-methylpropanoic acid **1a** (0.2 mmol) or deuterium-labeled compound  $[D_5]$ -**1a** (0.2 mmol), **2a** (0.6 mmol),  $Ni(OTf)_2$  (10 mol%), MesCOOH (20 mol%), TBAI (0.6 mmol) and  $Na_2CO_3$  (0.6 mmol) and DMSO (2 mL) were added into a dry tube. The reactions were stirred at 140°C in parallel for 50 min. After cooling to room temperature, these two reactions were combined and the solvent was removed under vacuum. The residue was purified by flash chromatography using 2% methanol in DCM as eluent. 73% starting material was recovered and the KIE value was determined to be 1.2.



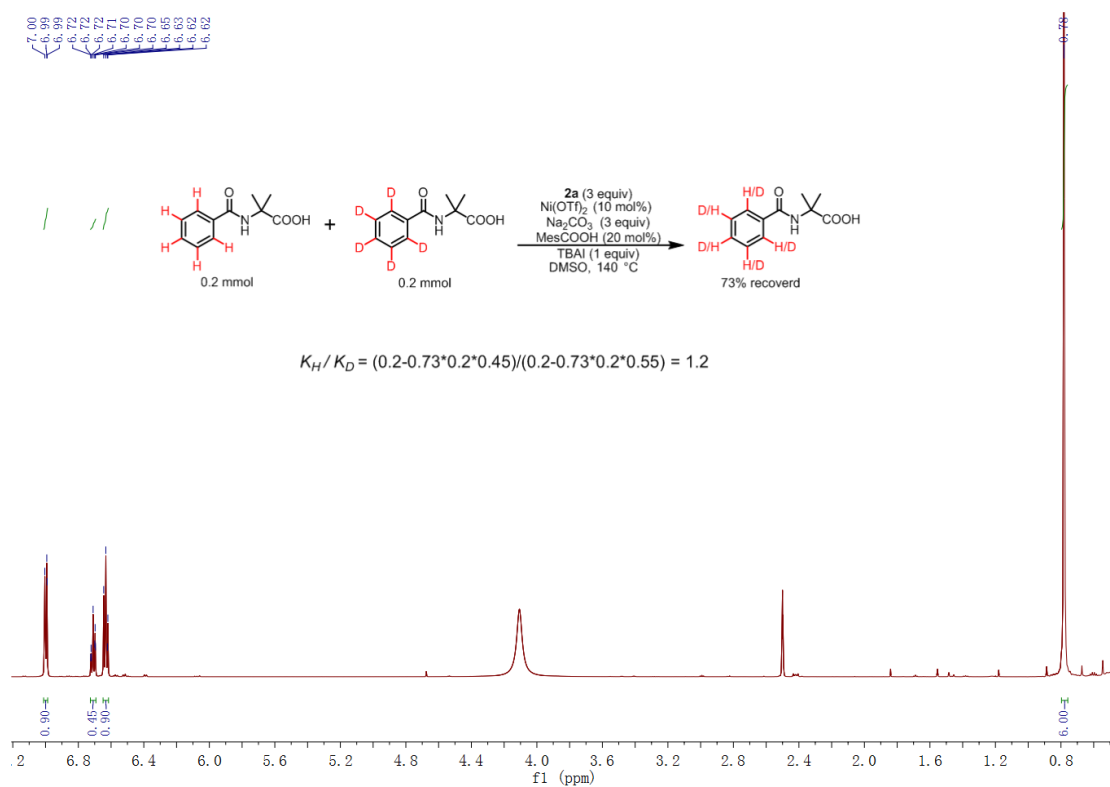

Scheme S2KIE experiment

#### 4. References

- (1) S. Li, W.Zhu, F.Gao, C.Li, J.Wang, H.Liu, *J. Org. Chem.*, **2017**, 82, 126.

## 5. NMR spectra

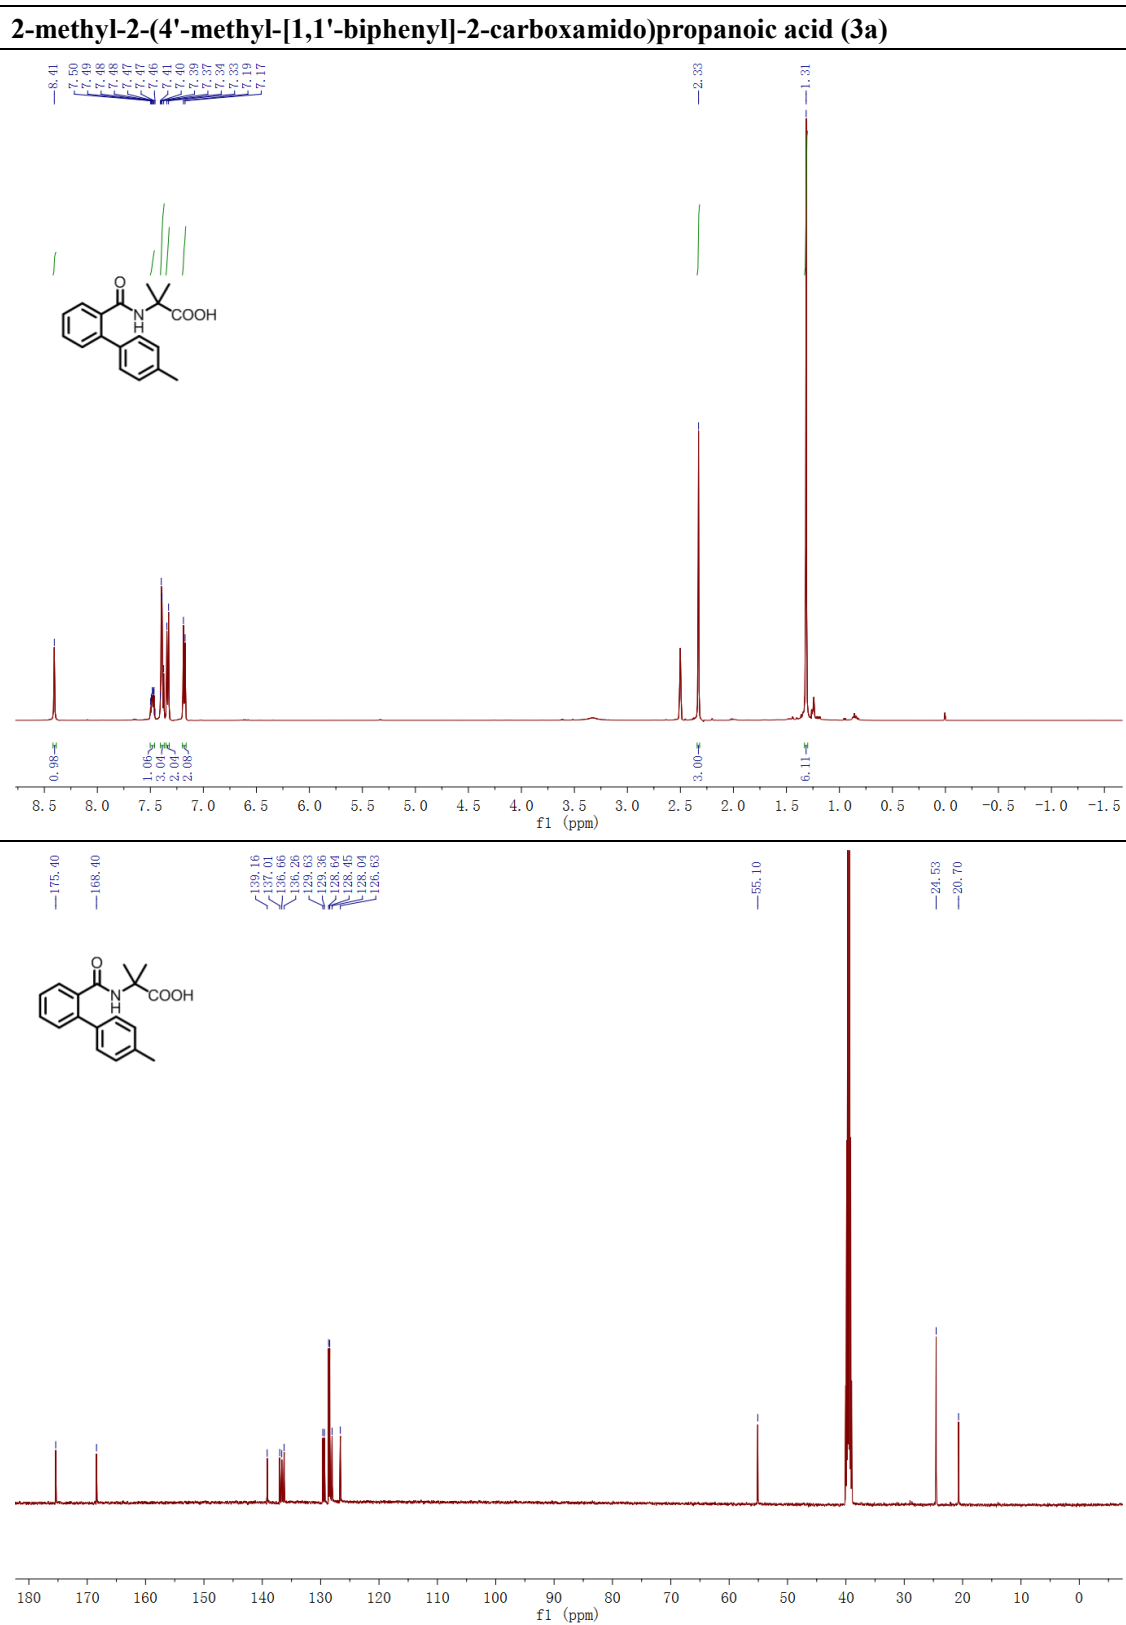

# 2-(3,4'-dimethyl-[1,1'-biphenyl]-2-ylcarboxamido)-2-methylpropanoic acid (3b)

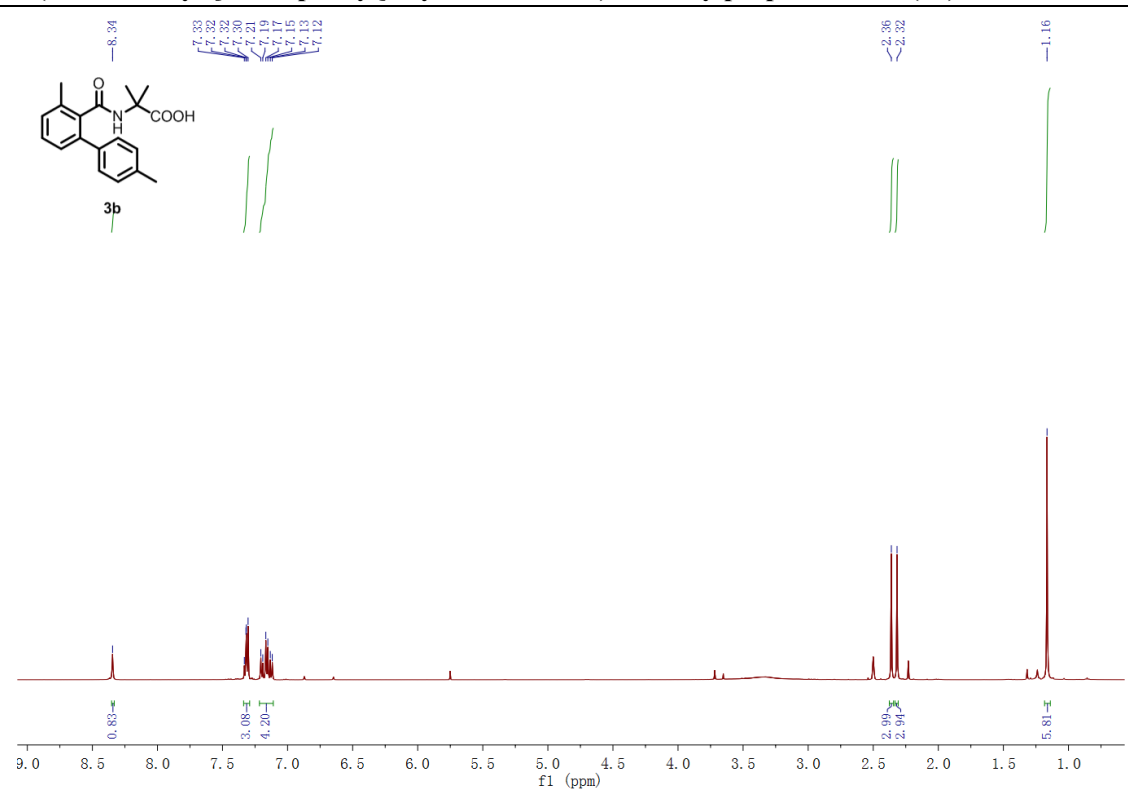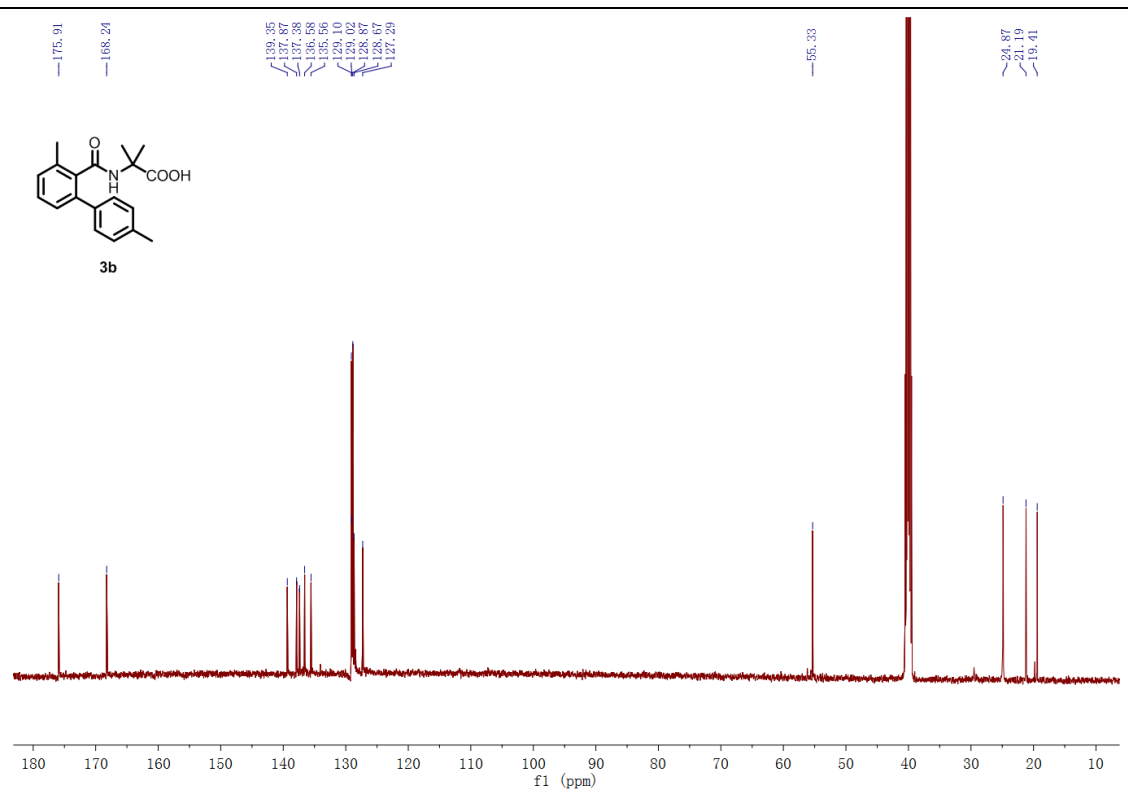

**2-methyl-2-(4'-methyl-4-(trifluoromethyl)-[1,1'-biphenyl]-2-ylcarboxamido)propanoic acid (3c)**

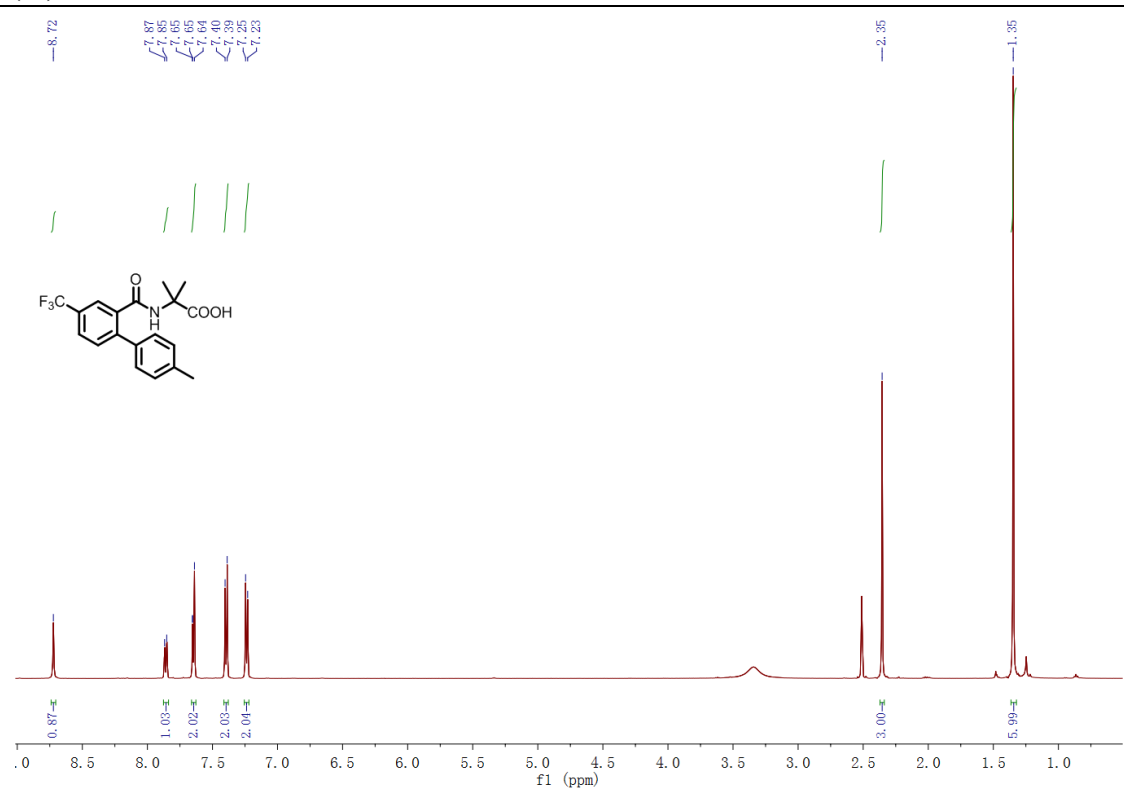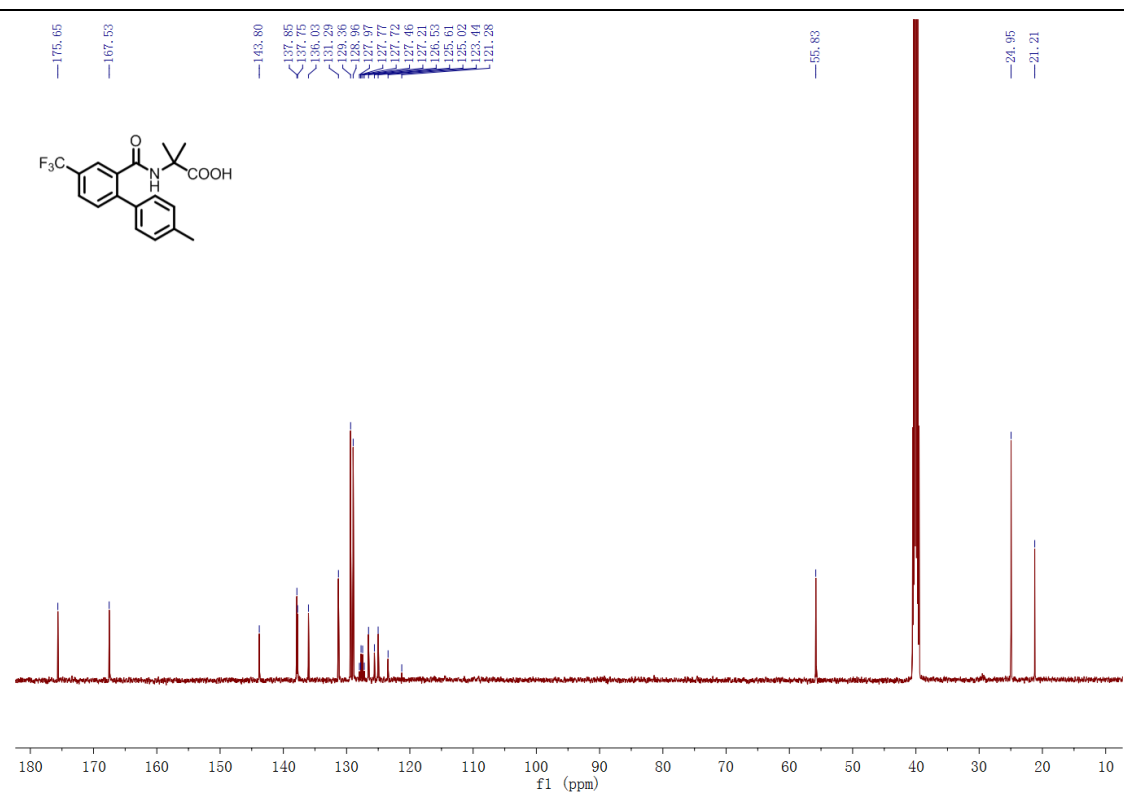

**2-(4,4'-dimethyl-[1,1'-biphenyl]-2-ylcarboxamido)-2-methylpropanoic acid (3d)**

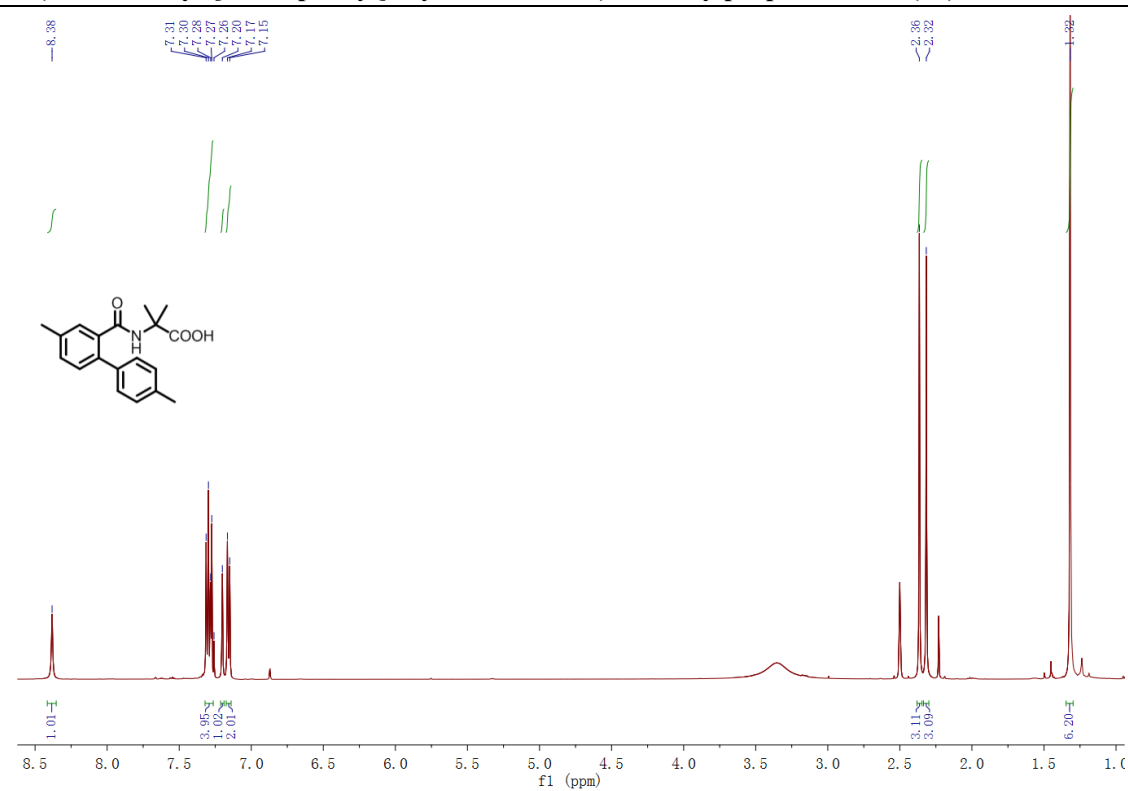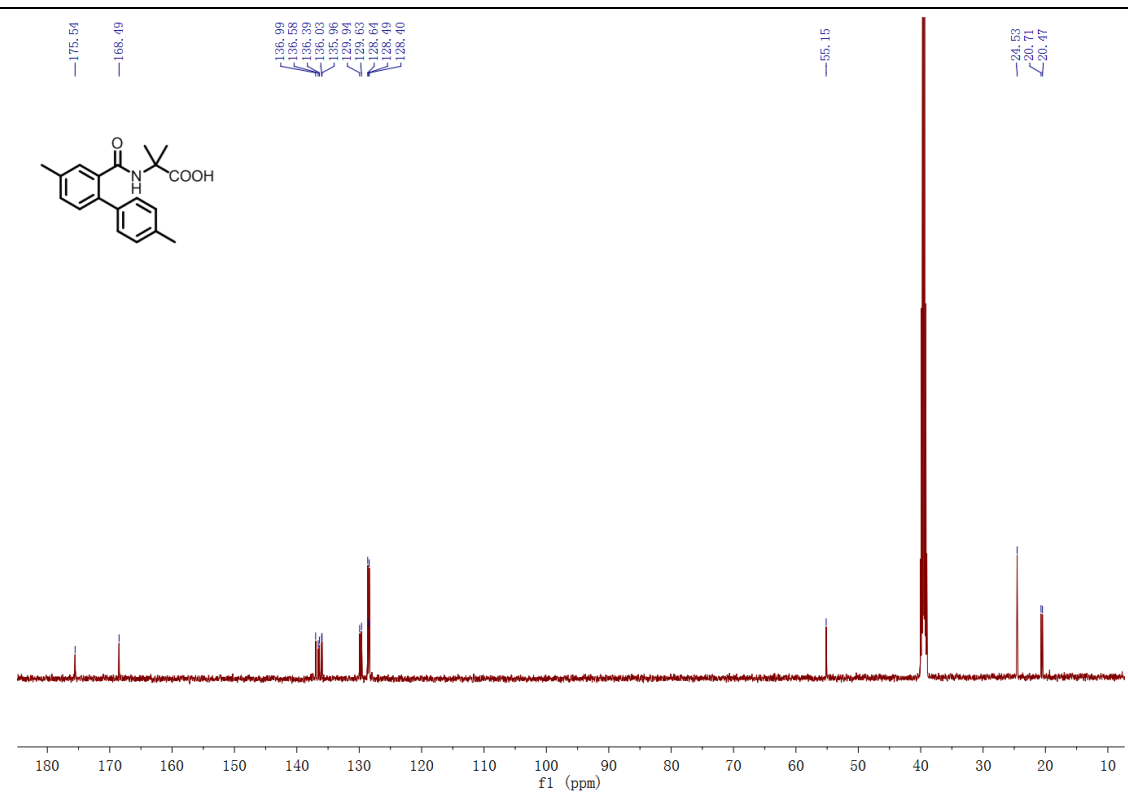

**2-(4-methoxy-4'-methyl-[1,1'-biphenyl]-2-ylcarboxamido)-2-methylpropanoic acid (3e)**

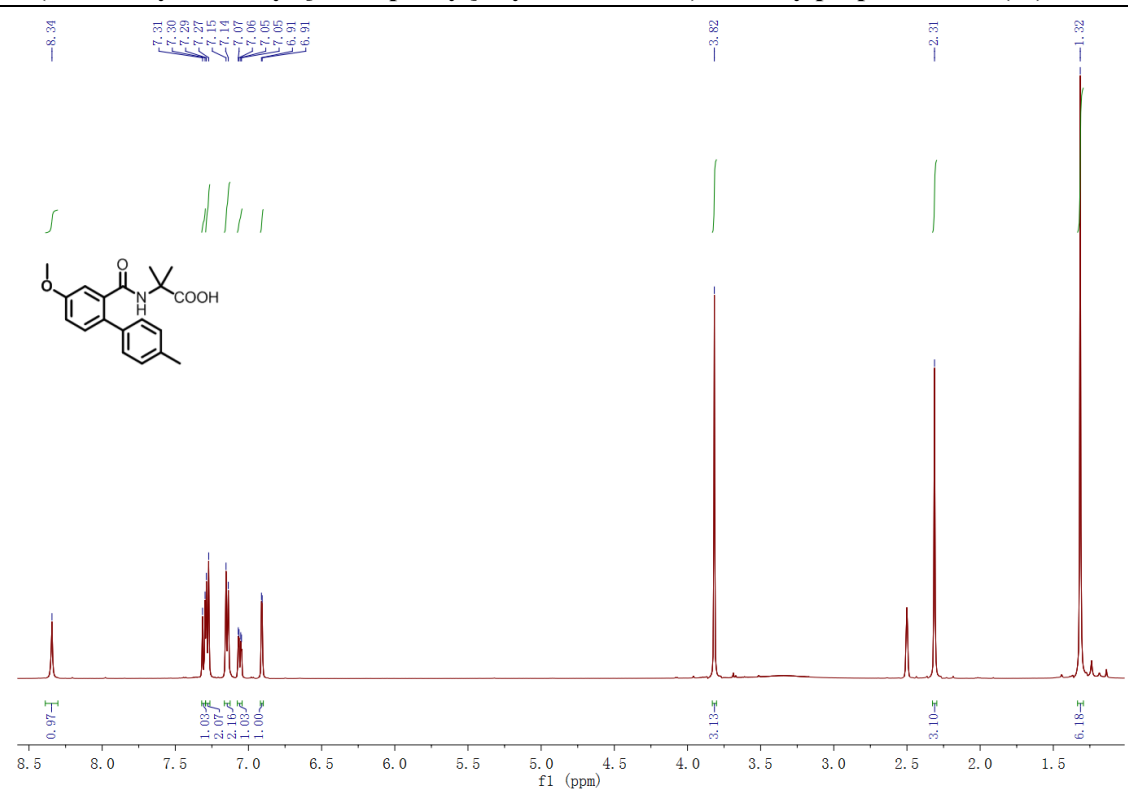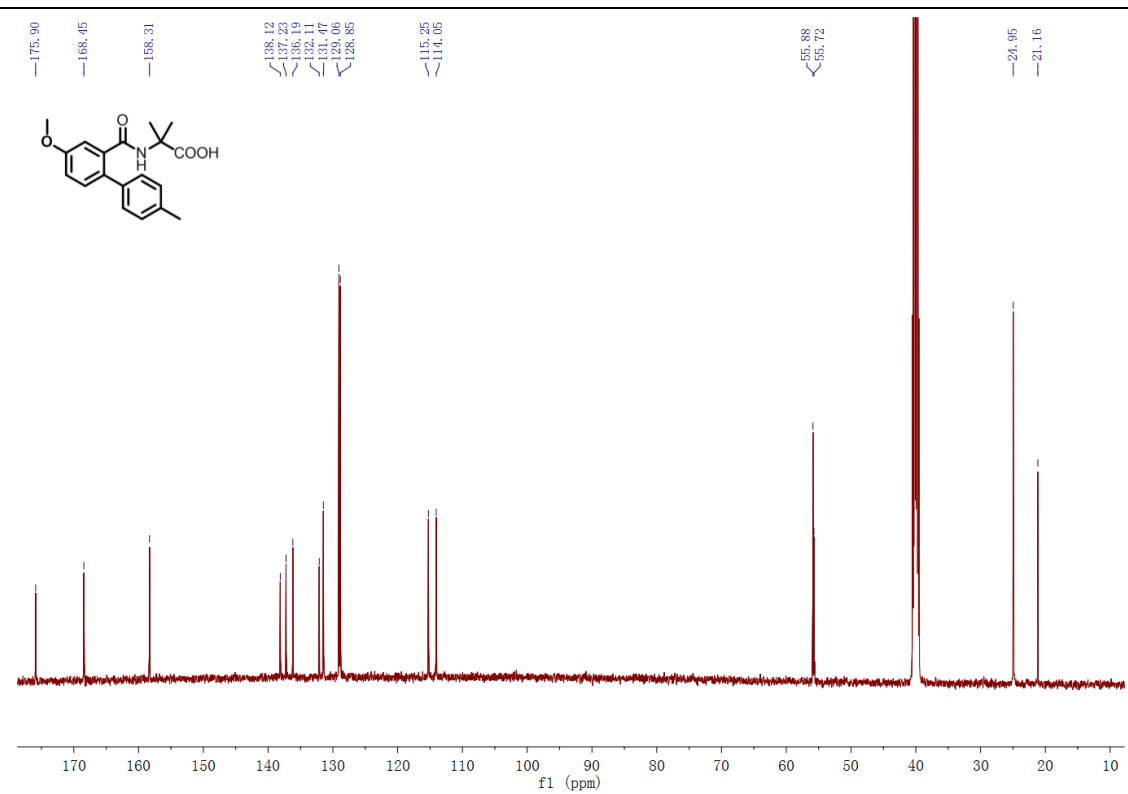

**2-(5-fluoro-4'-methyl-[1,1'-biphenyl]-2-ylcarboxamido)-2-methylpropanoic acid (3f)**

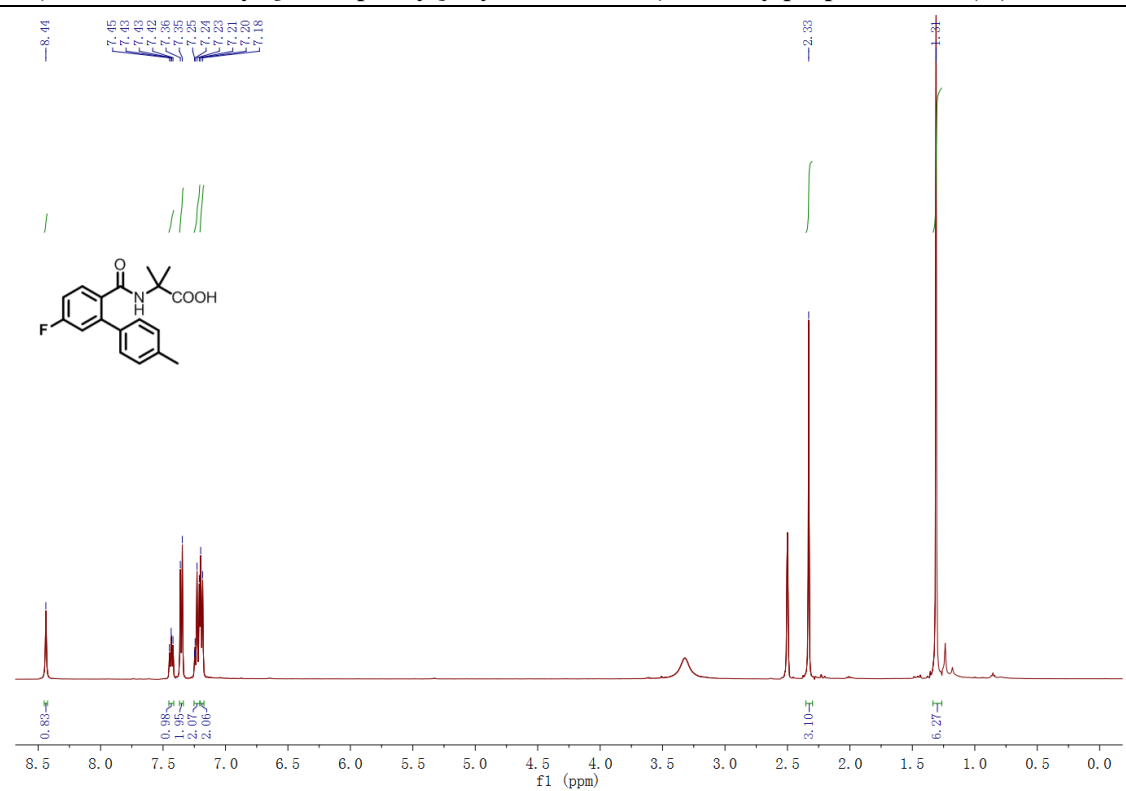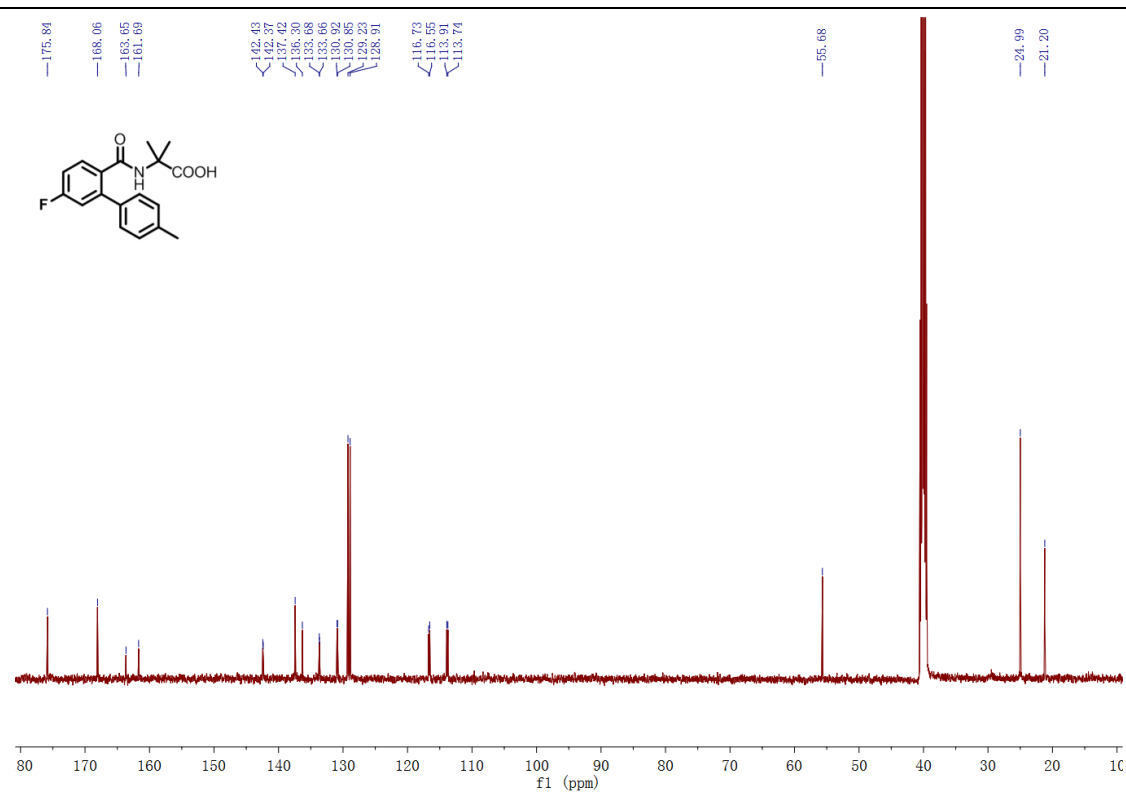

**2-(5-chloro-4'-methyl-[1,1'-biphenyl]-2-ylcarboxamido)-2-methylpropanoic acid (3g)**

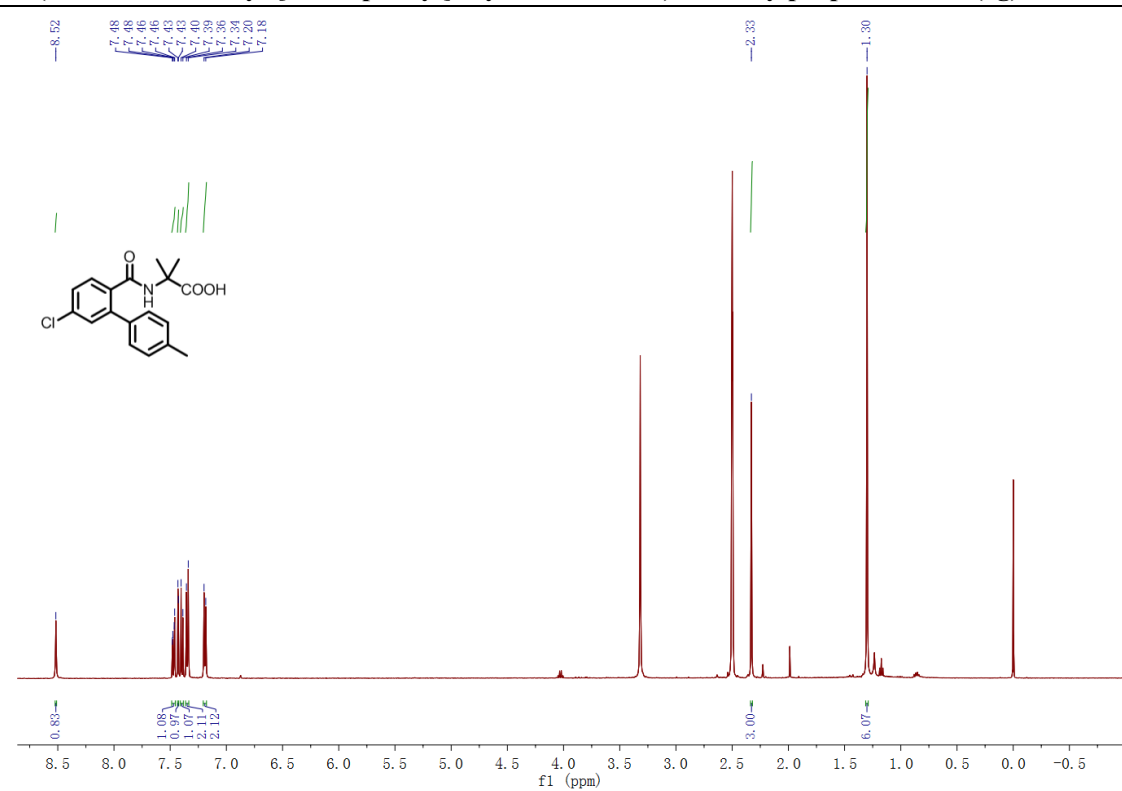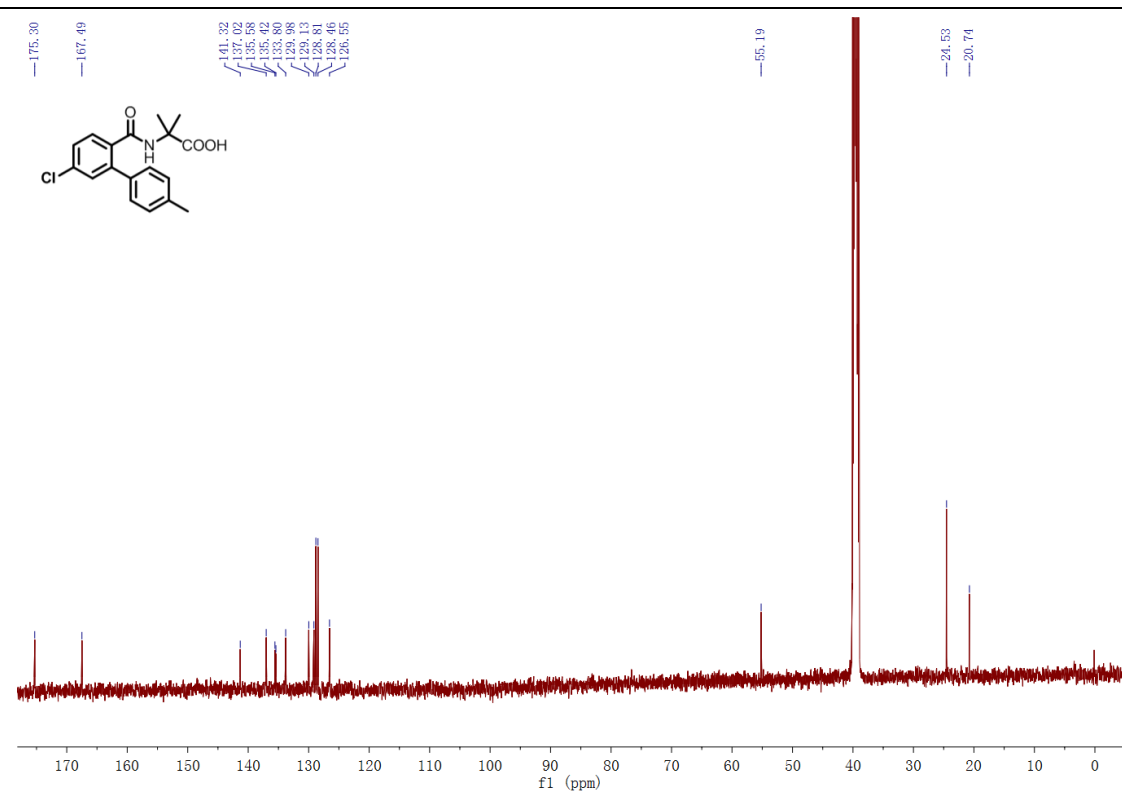



**2-(5-bromo-4'-methyl-[1,1'-biphenyl]-2-ylcarboxamido)-2-methylpropanoic acid (3h)**

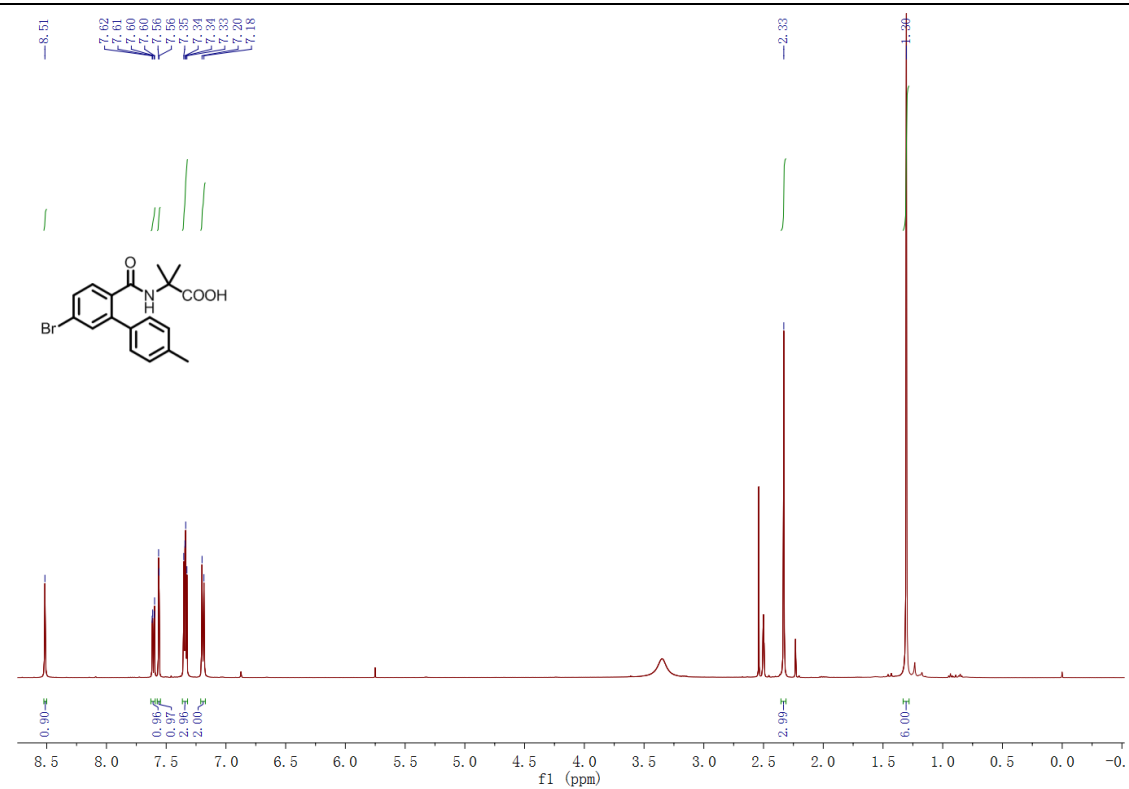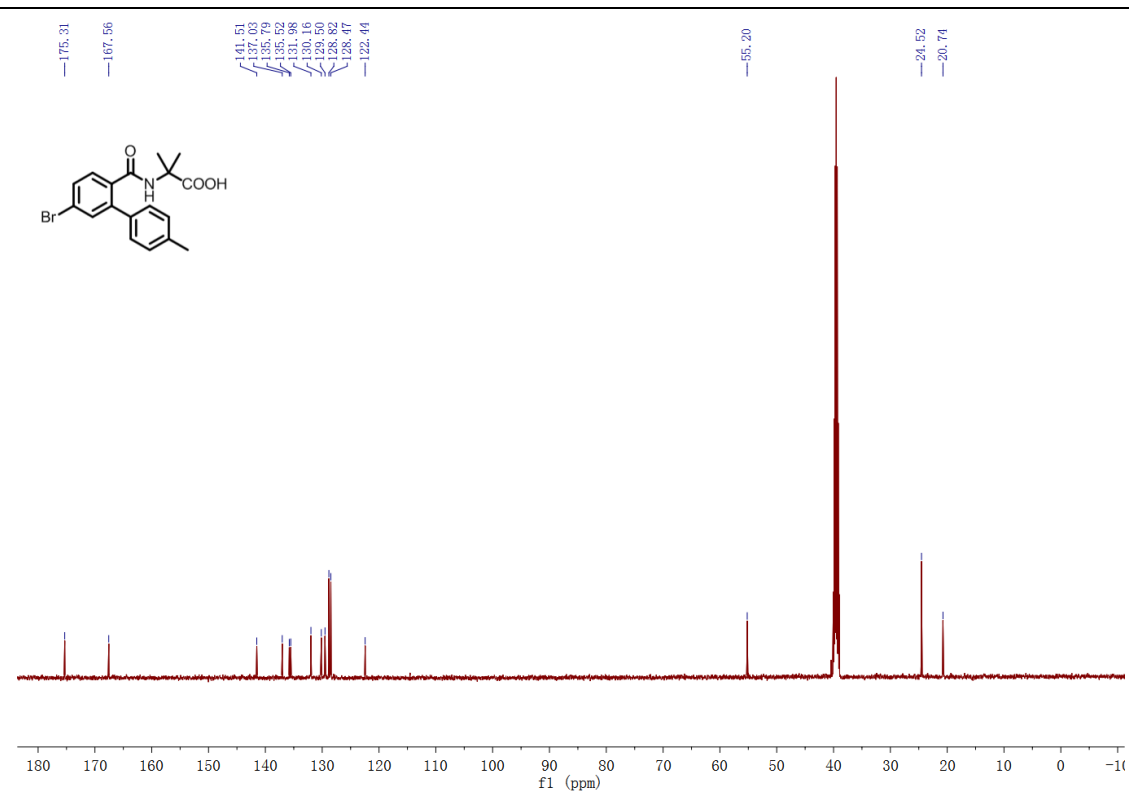

**2-methyl-2-(4'-methyl-5-nitro-[1,1'-biphenyl]-2-ylcarboxamido)propanoic acid (3i)**

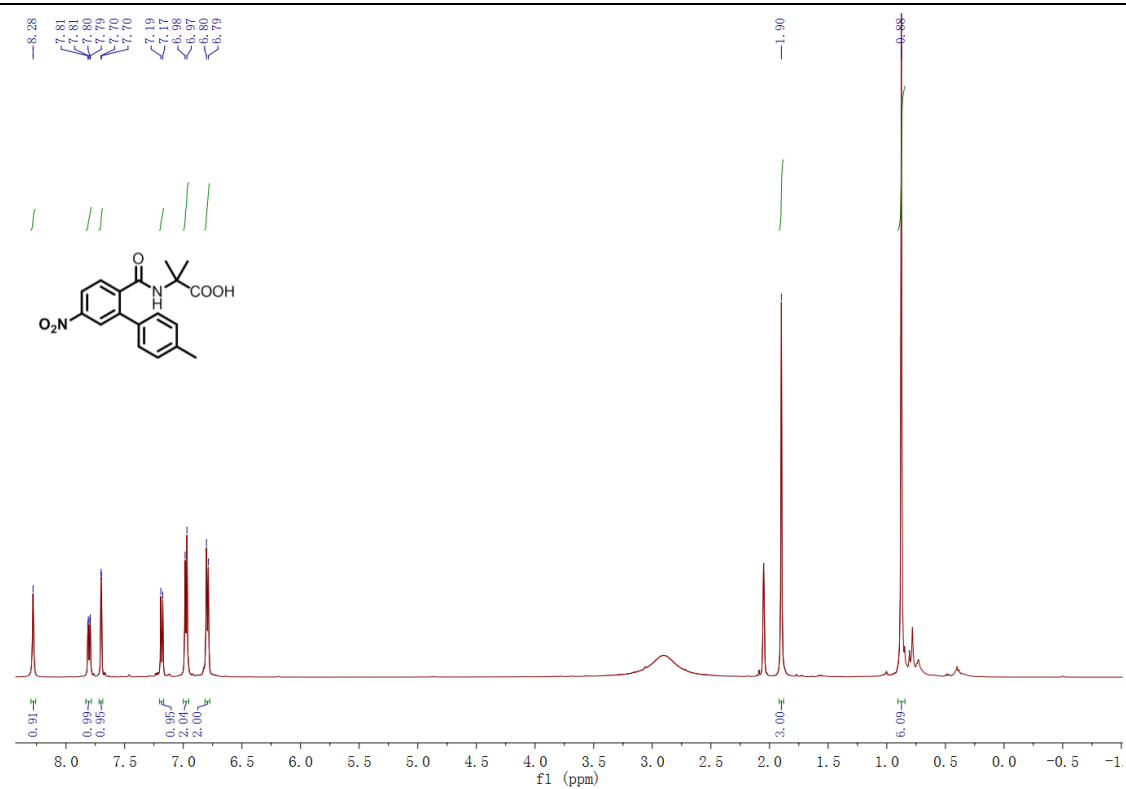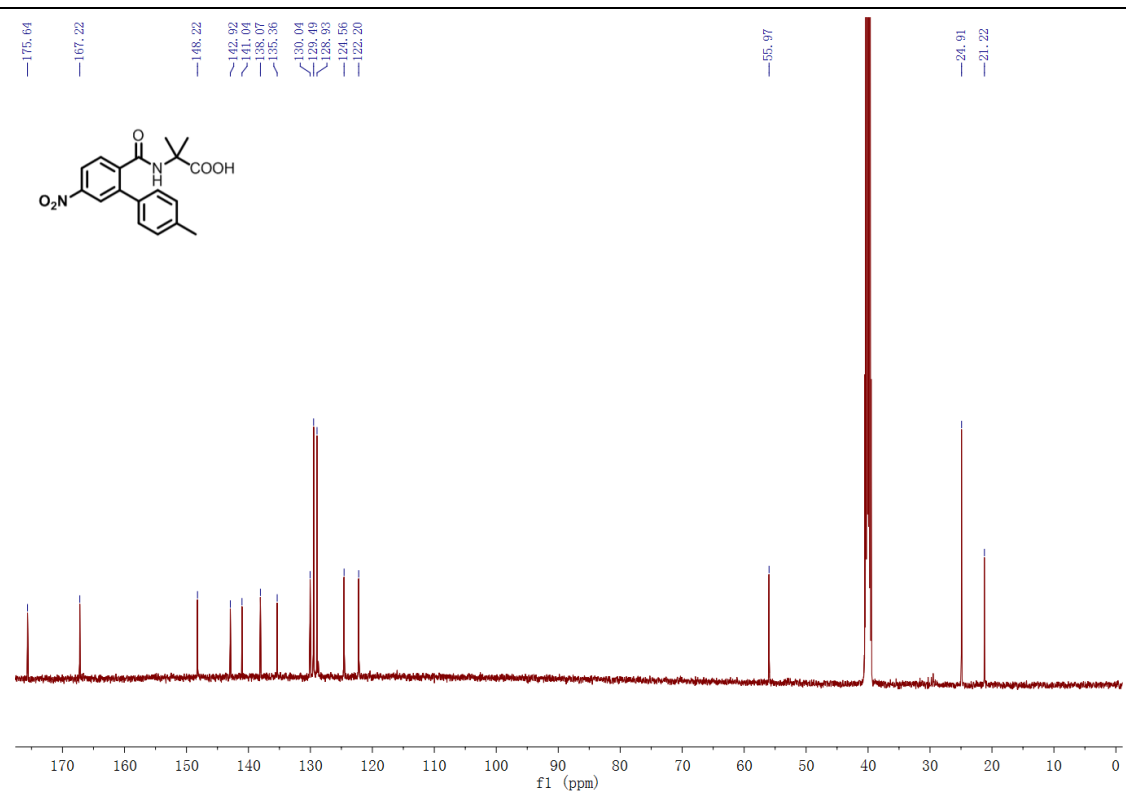

**2-(4',5-dimethyl-[1,1'-biphenyl]-2-ylcarboxamido)-2-methylpropanoic acid (3j)**

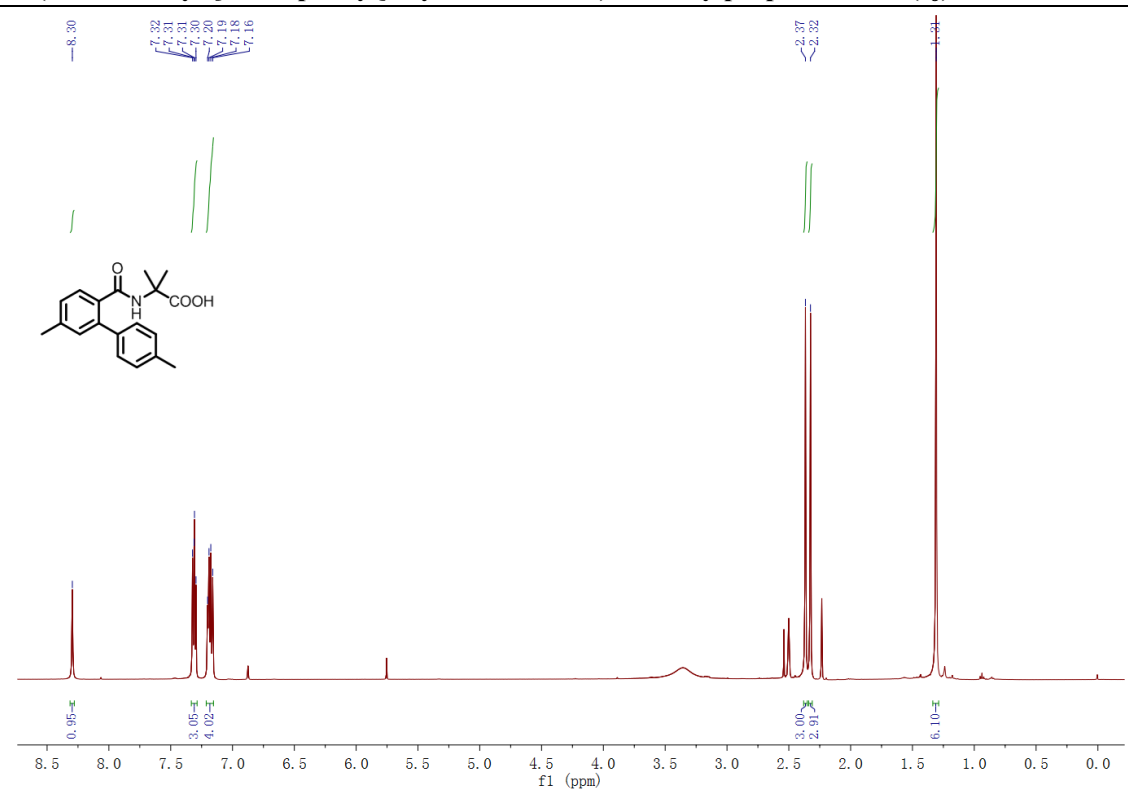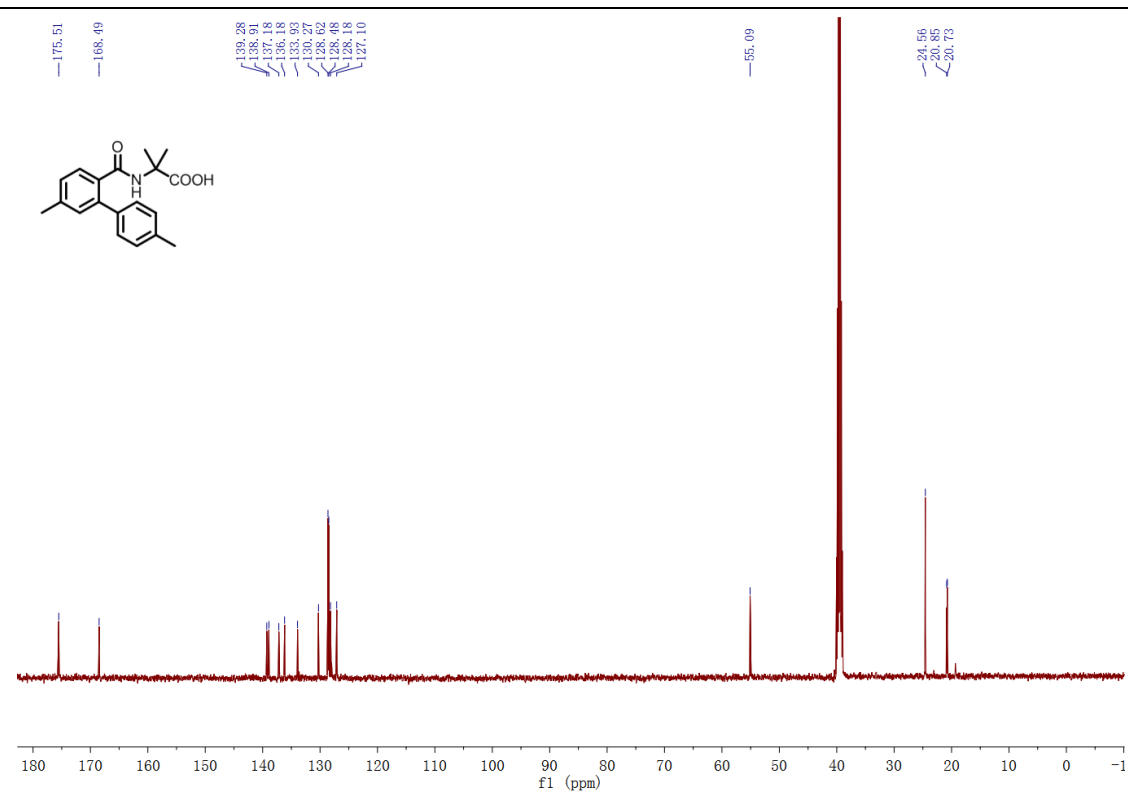

**2-(5-(tert-butyl)-4'-methyl-[1,1'-biphenyl]-2-ylcarboxamido)-2-methylpropanoic acid (3k)**

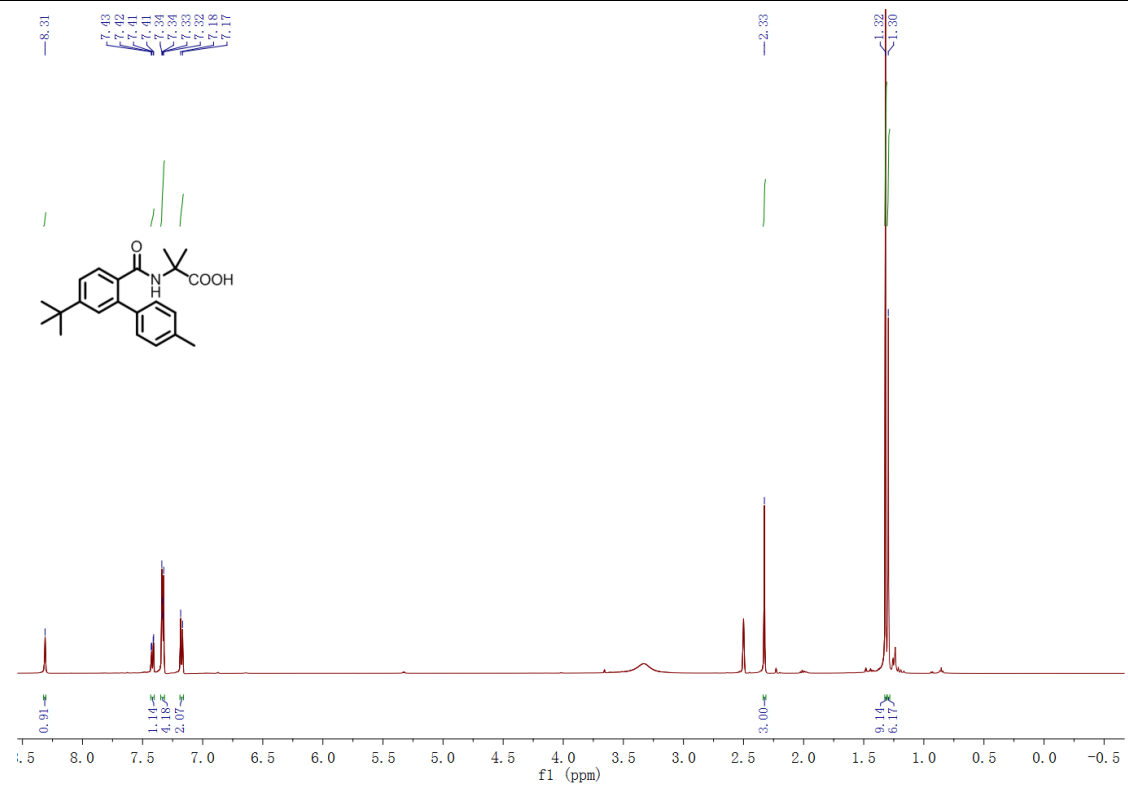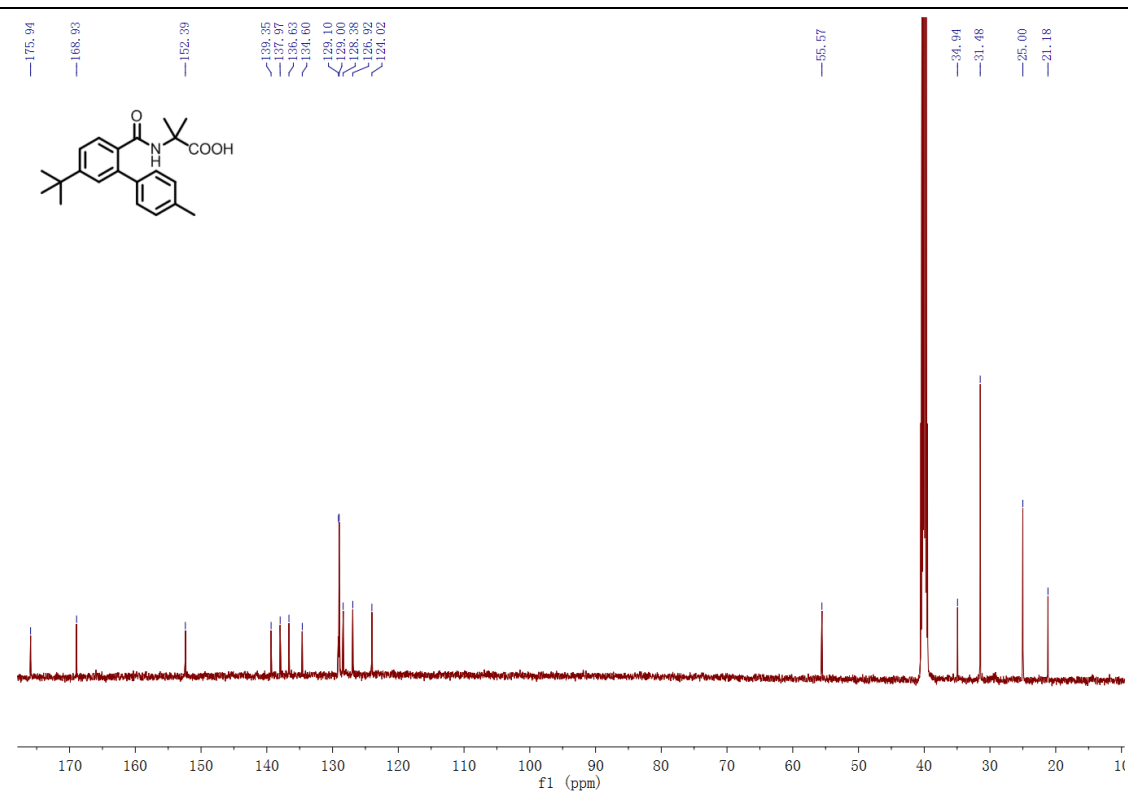

**2-methyl-2-(4'-methyl-5-vinyl-[1,1'-biphenyl]-2-ylcarboxamido)propanoic acid (3l)**

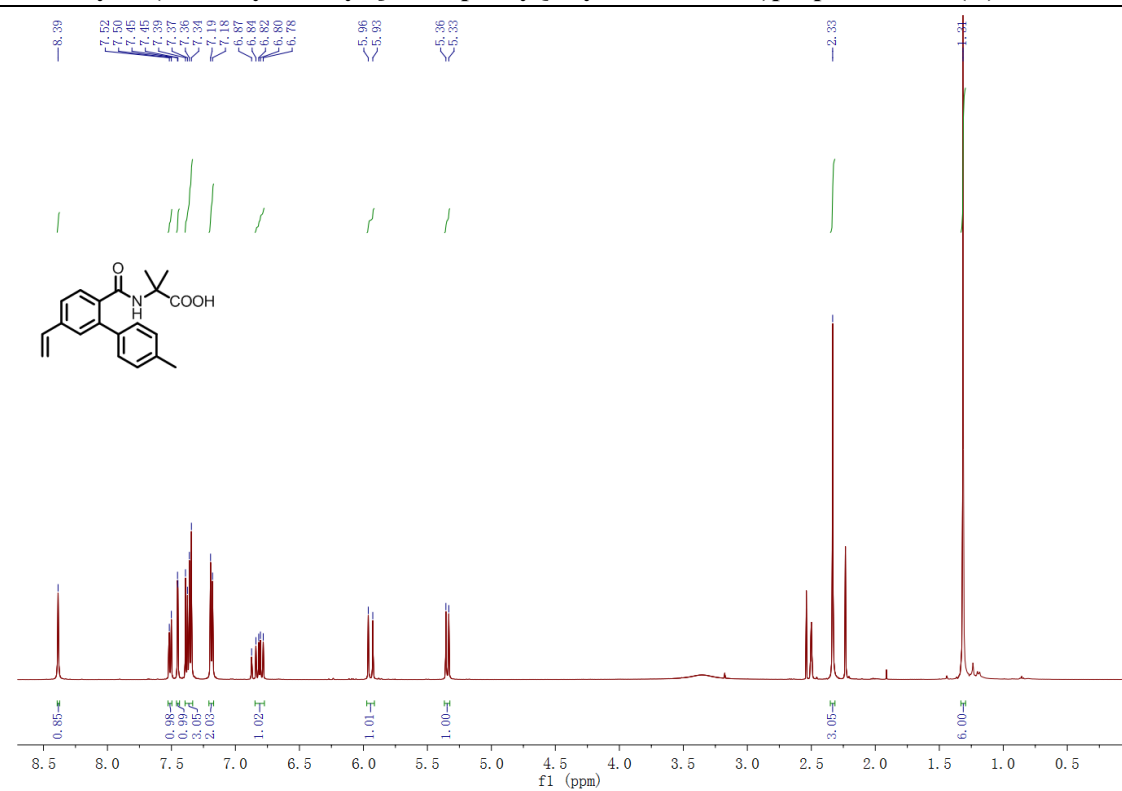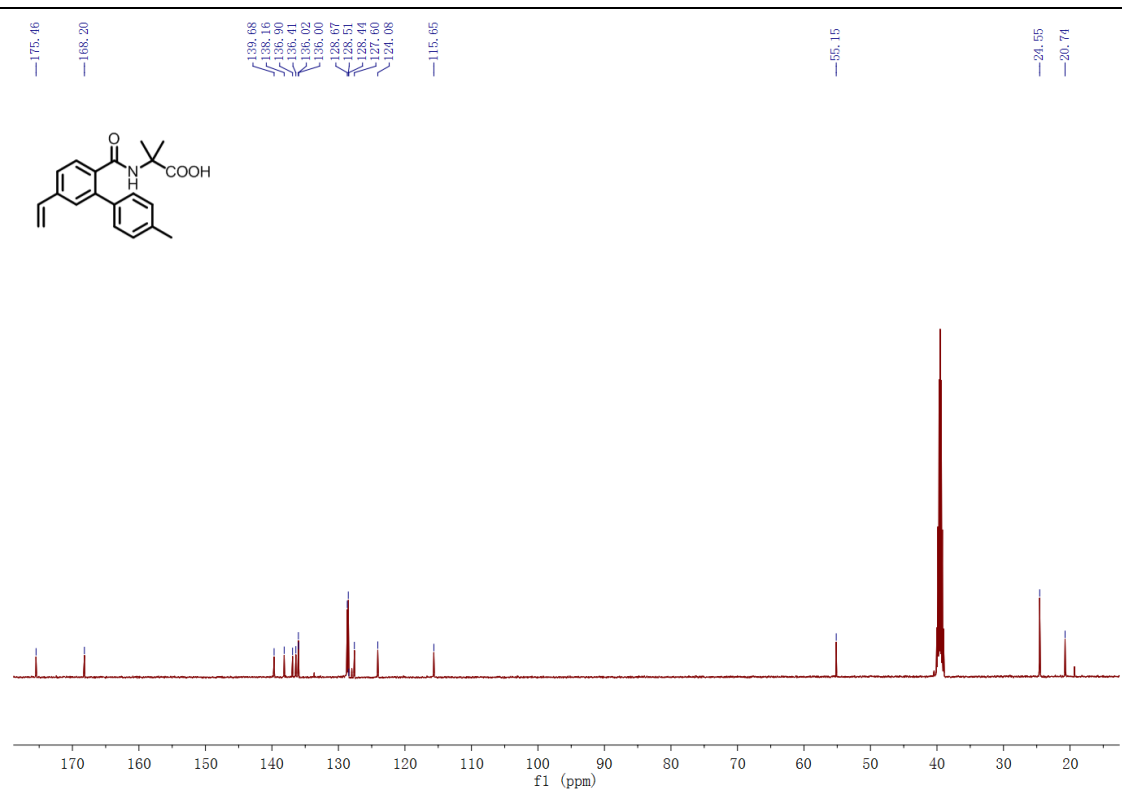

|       |       |       |       |       |       |       |       |       |       |       |       |       |       |       |       |       |       |
|-------|-------|-------|-------|-------|-------|-------|-------|-------|-------|-------|-------|-------|-------|-------|-------|-------|-------|
| -8.46 | -7.75 | -7.73 | -7.69 | -7.68 | -7.67 | -7.62 | -7.49 | -7.46 | -7.45 | -7.43 | -7.42 | -7.40 | -7.39 | -7.31 | -7.20 | -2.34 | -1.34 |
|-------|-------|-------|-------|-------|-------|-------|-------|-------|-------|-------|-------|-------|-------|-------|-------|-------|-------|

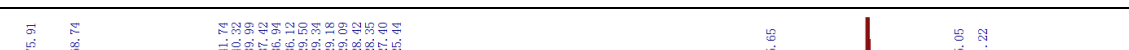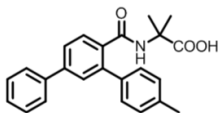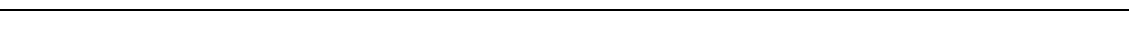

**2-methyl-2-(3-(p-tyl)-2-naphthamido)propanoic acid (3n)**

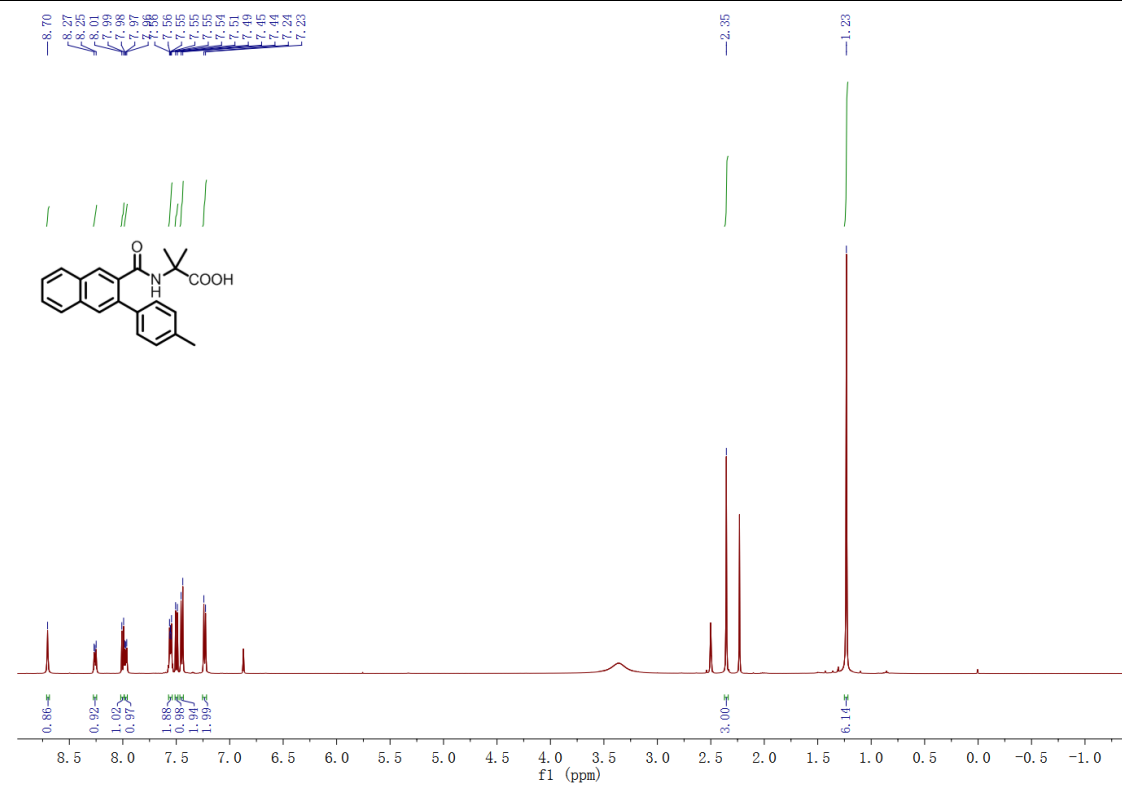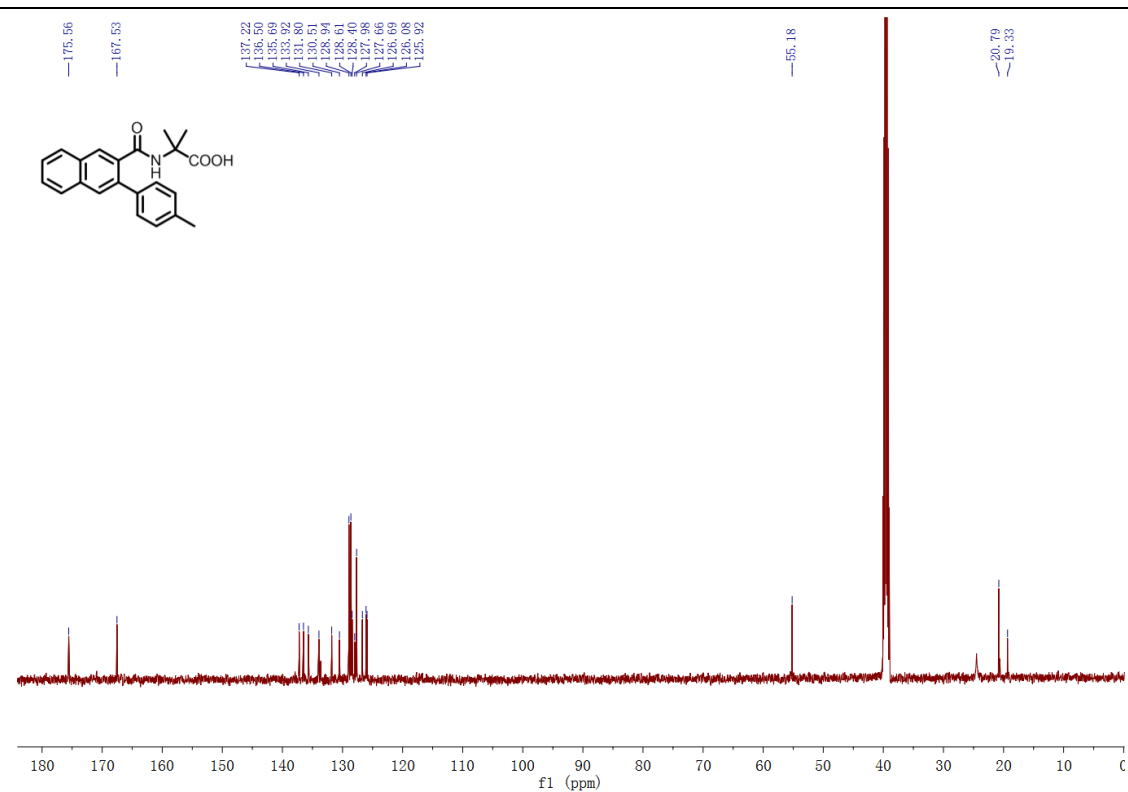

**2-methyl-2-(3-(p-tolyl)thiophene-2-carboxamido)propanoic acid (3o)**

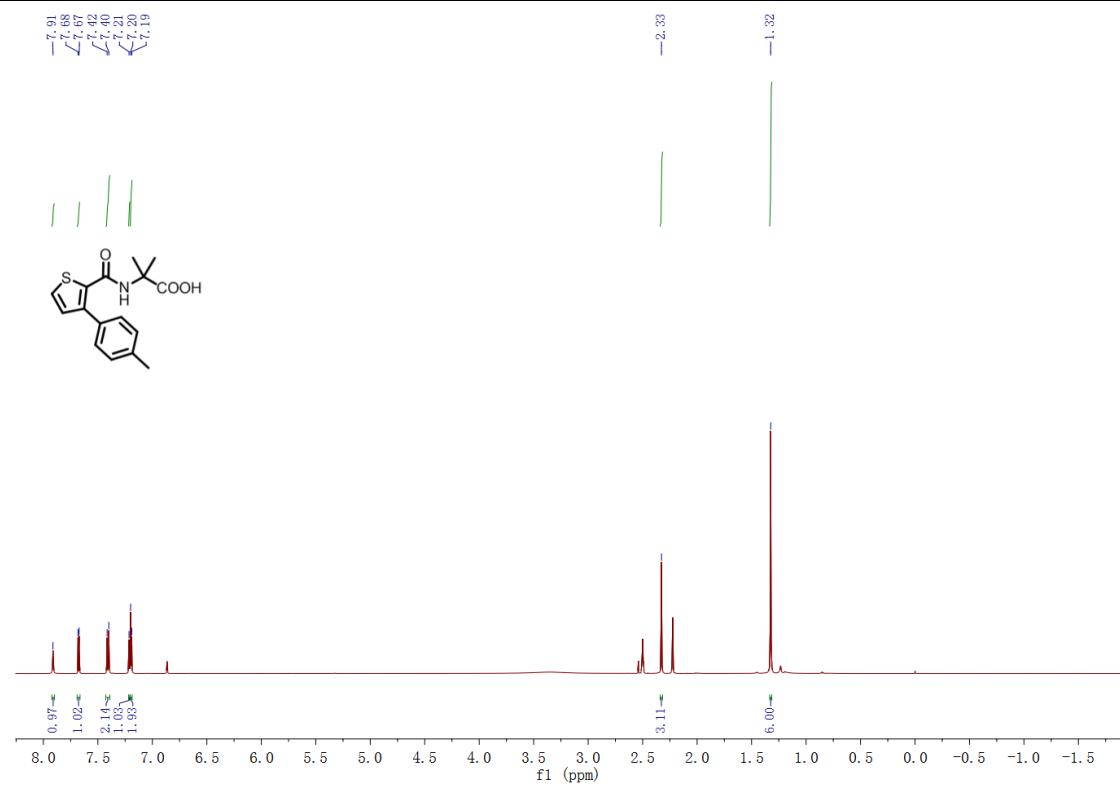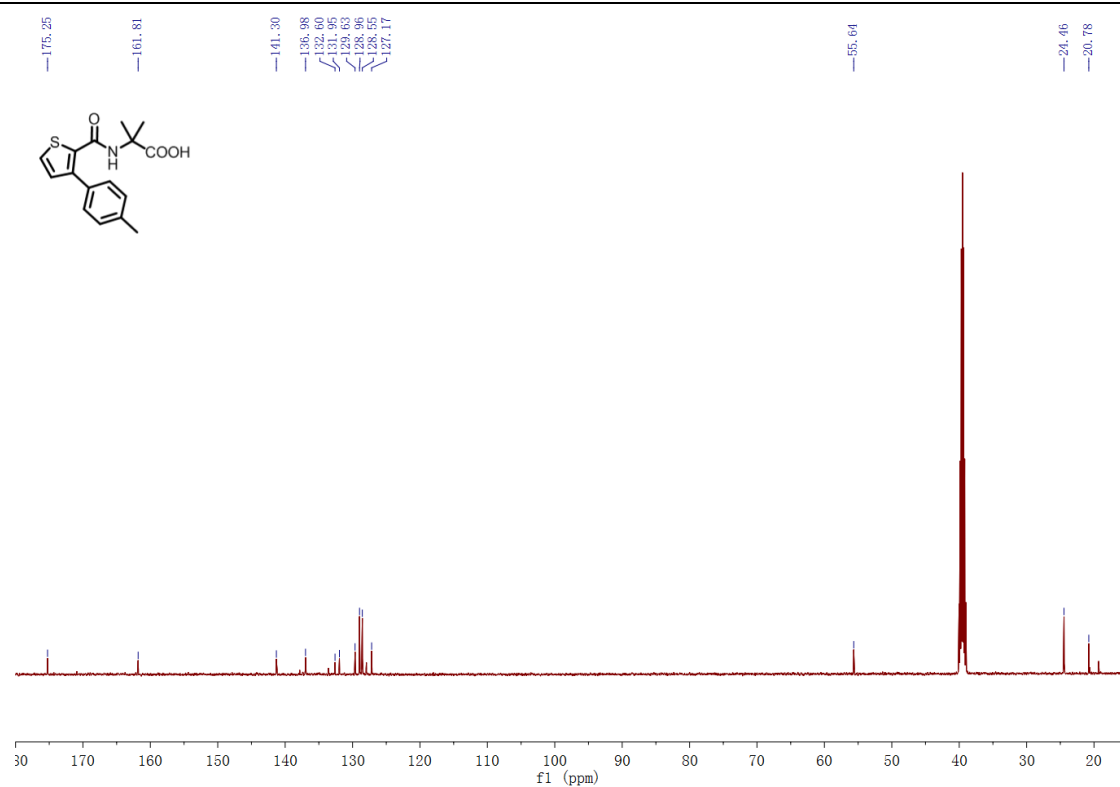



### 3-methyl-2-(4'-methyl-[1,1'-biphenyl]-2-ylcarboxamido)pentanoic acid (3p)

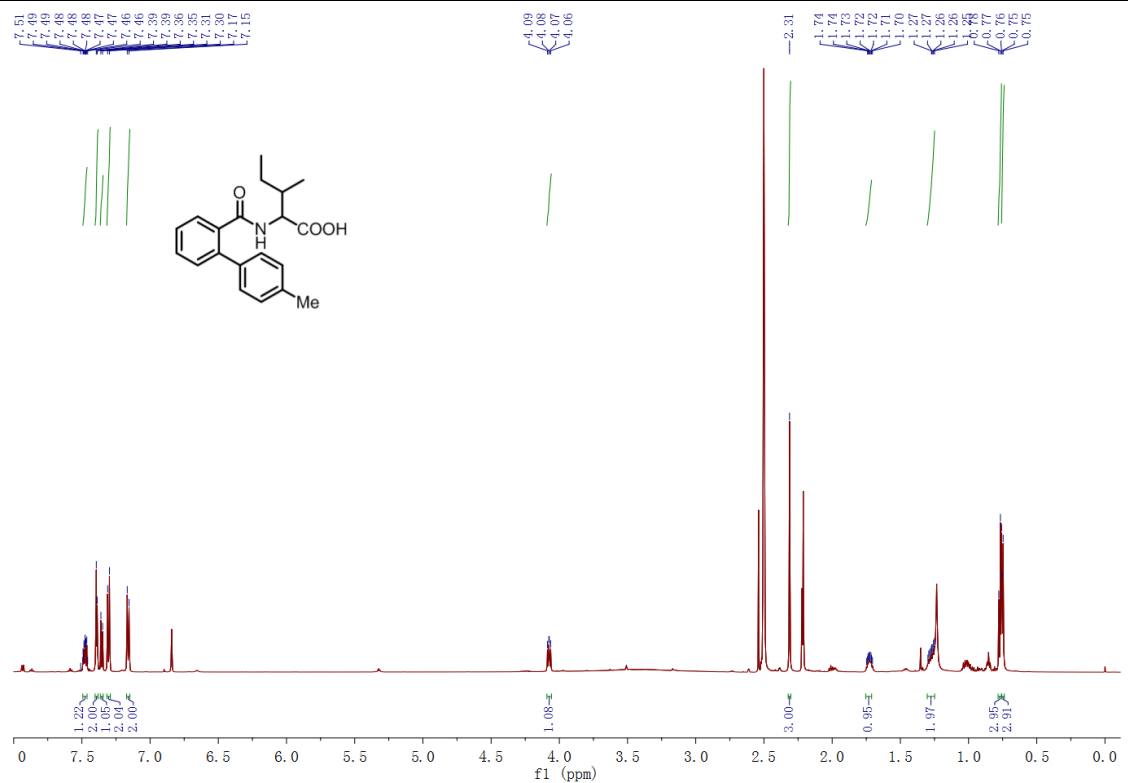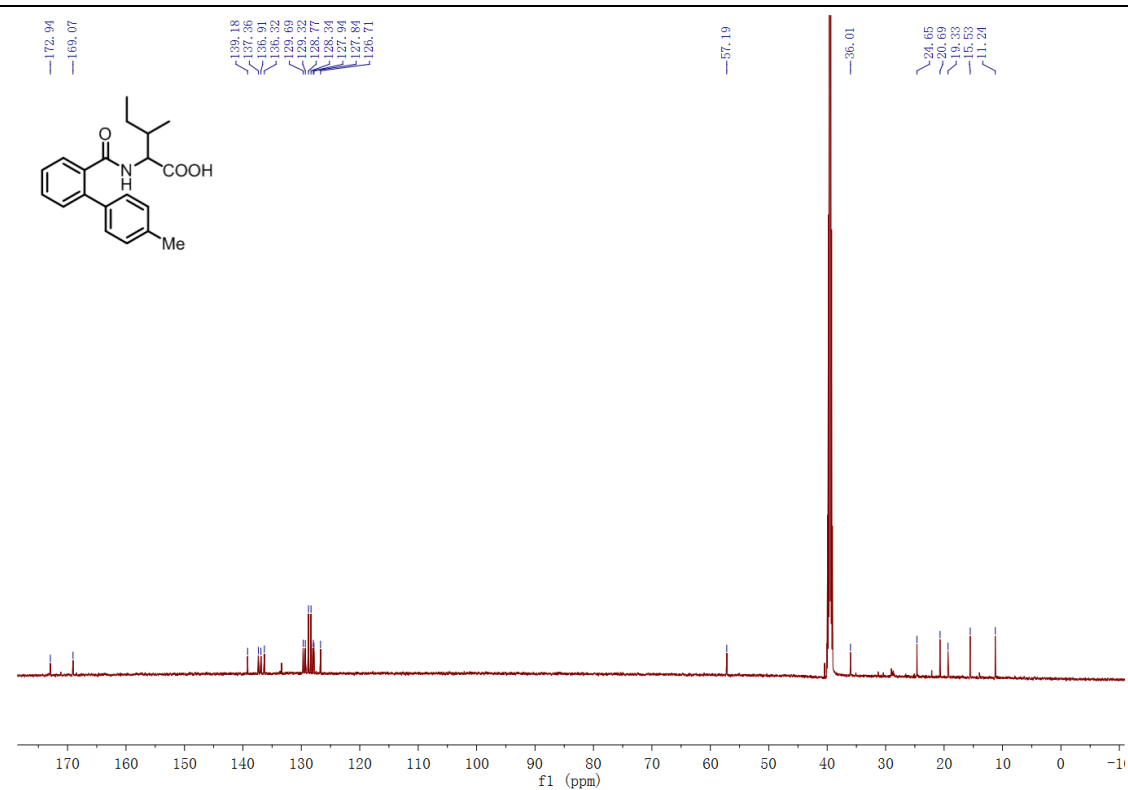

**2-(4'-methyl-[1,1'-biphenyl]-2-ylcarboxamido)propanoic acid (3q)**

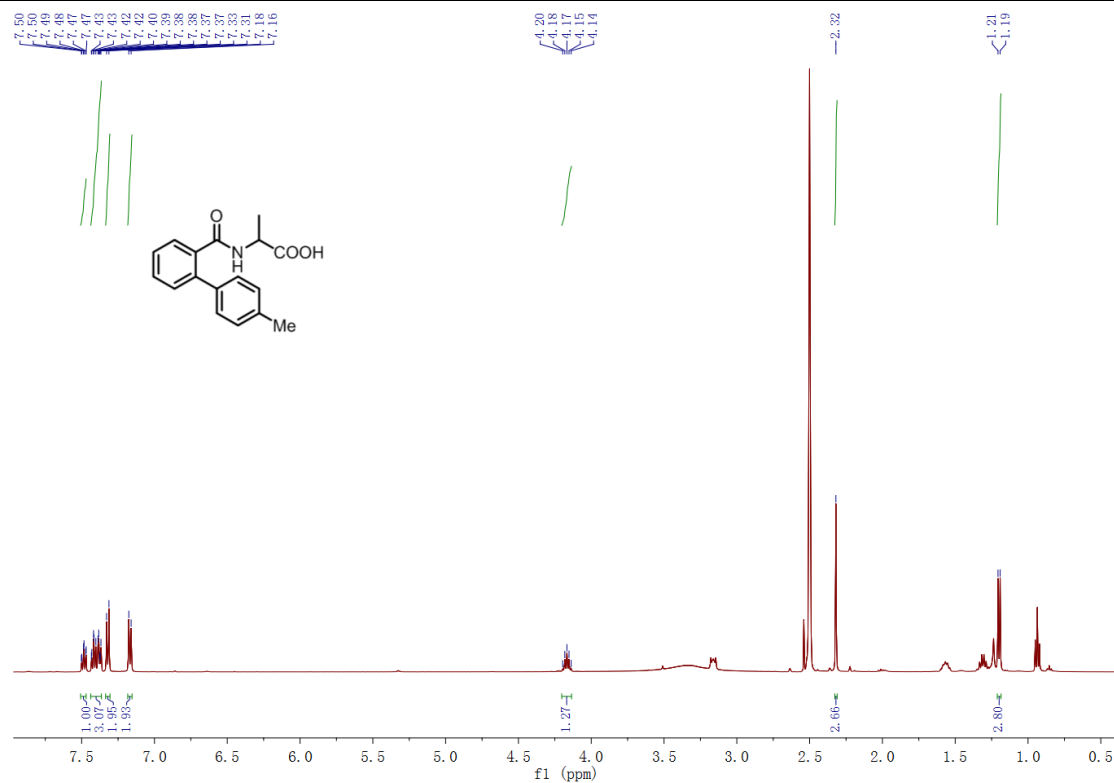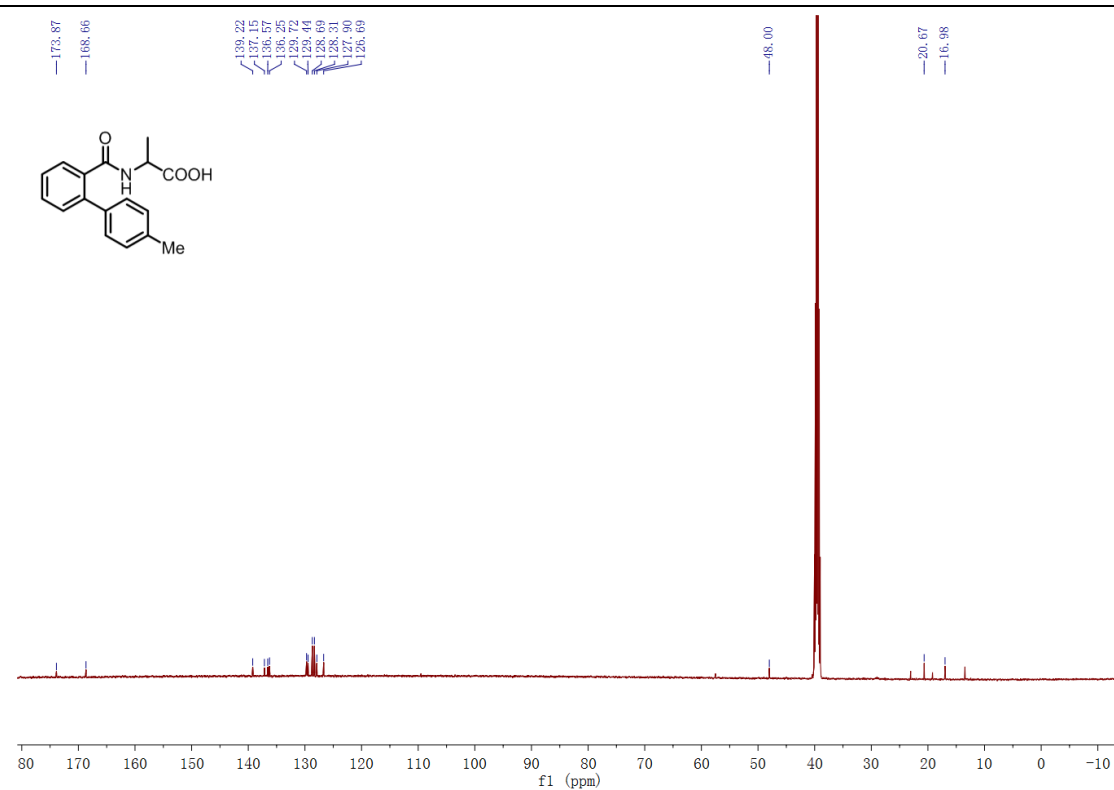

**2-(4'-(tert-butyl)-[1,1'-biphenyl]-2-ylcarboxamido)-2-methylpropanoic acid (4a)**

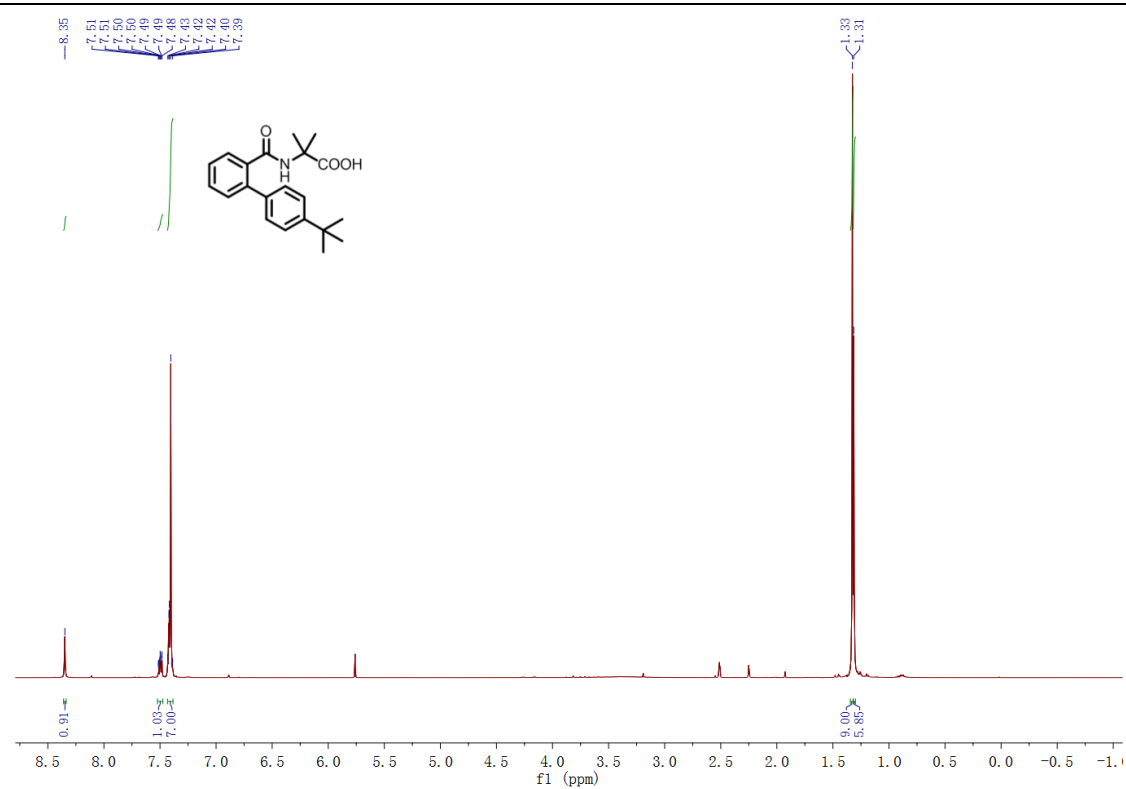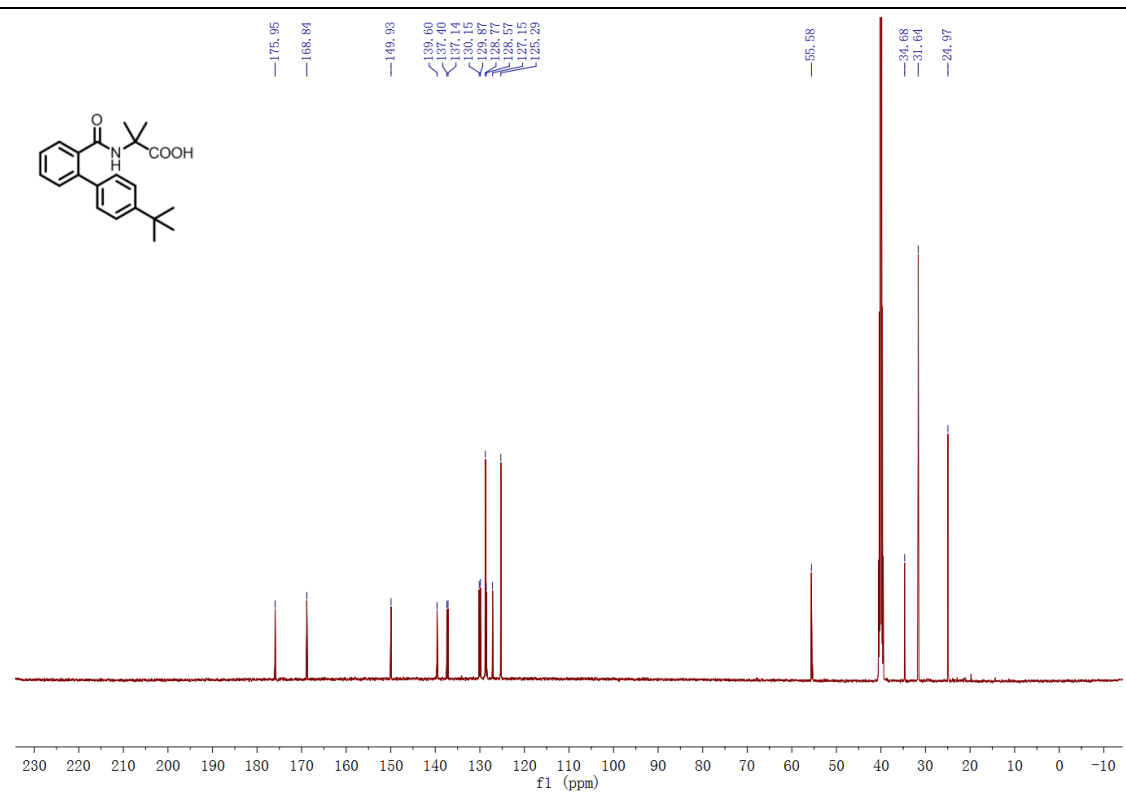

$\begin{array}{c} 7, 47 \\ 7, 46 \\ 7, 45 \\ 7, 45 \\ 7, 38 \\ 7, 38 \\ 7, 38 \\ 6, 51 \\ 6, 52 \end{array}$

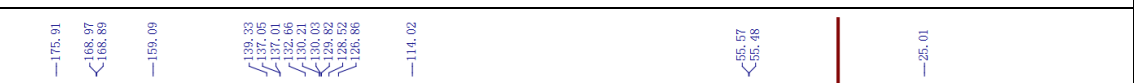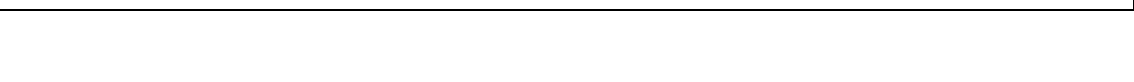

**2-(4'-(methoxycarbonyl)-[1,1'-biphenyl]-2-ylcarboxamido)-2-methylpropanoic acid (4c)**

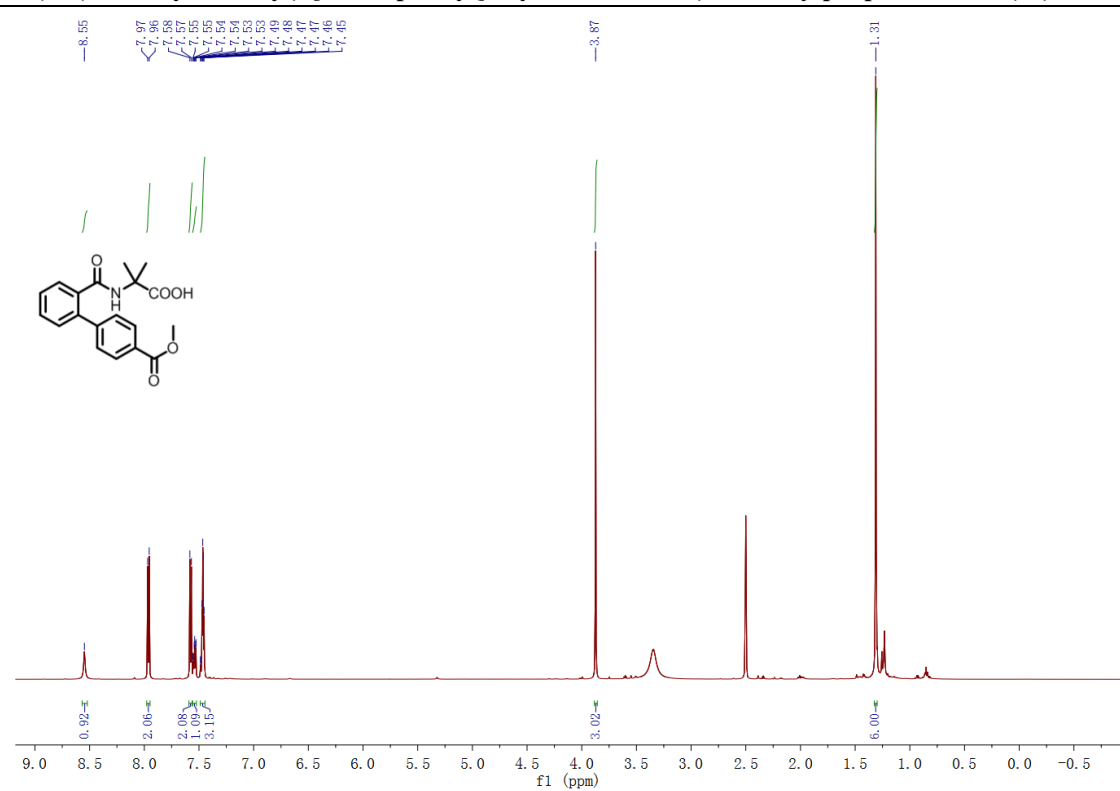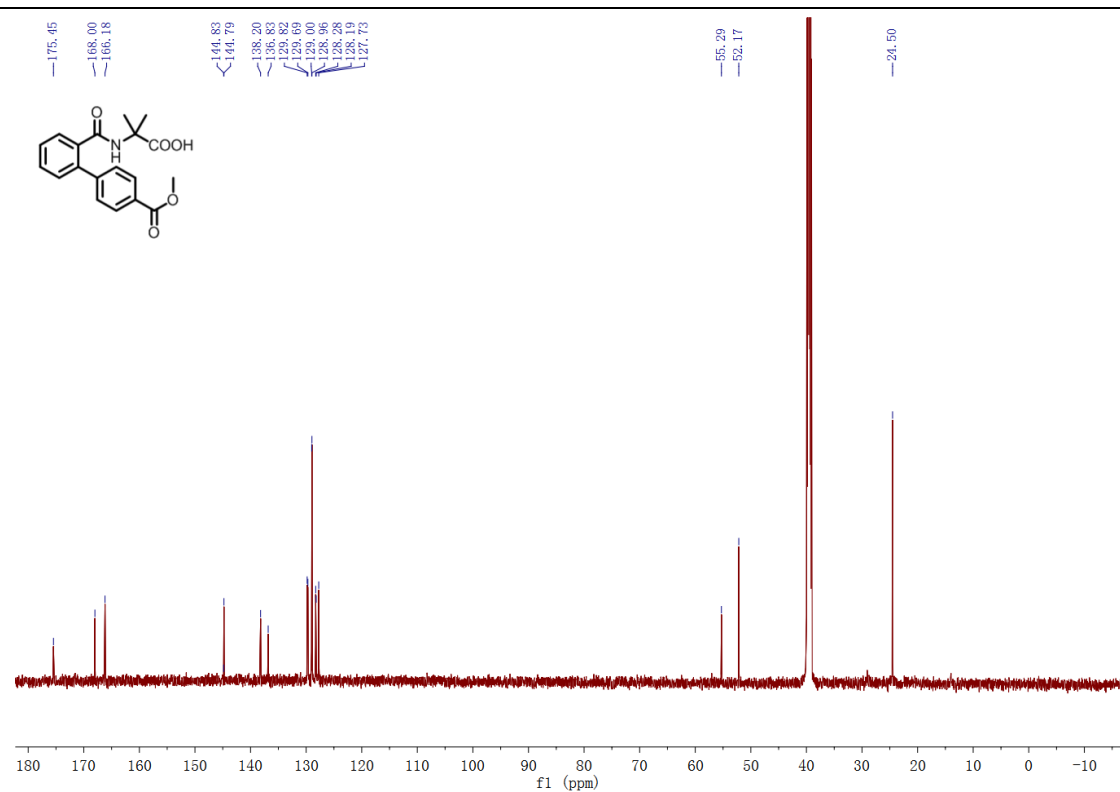

2-(4'-fluoro-[1,1'-biphenyl]-2-ylcarboxamido)-2-methylpropanoic acid (4d)

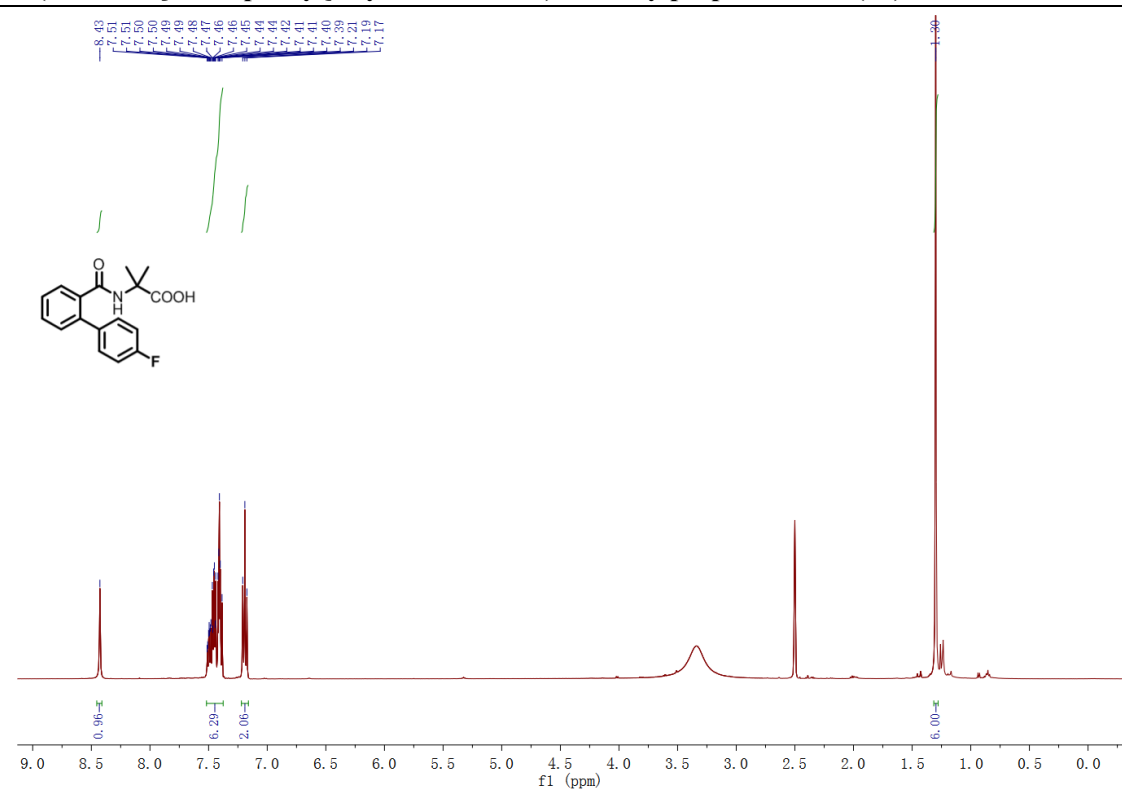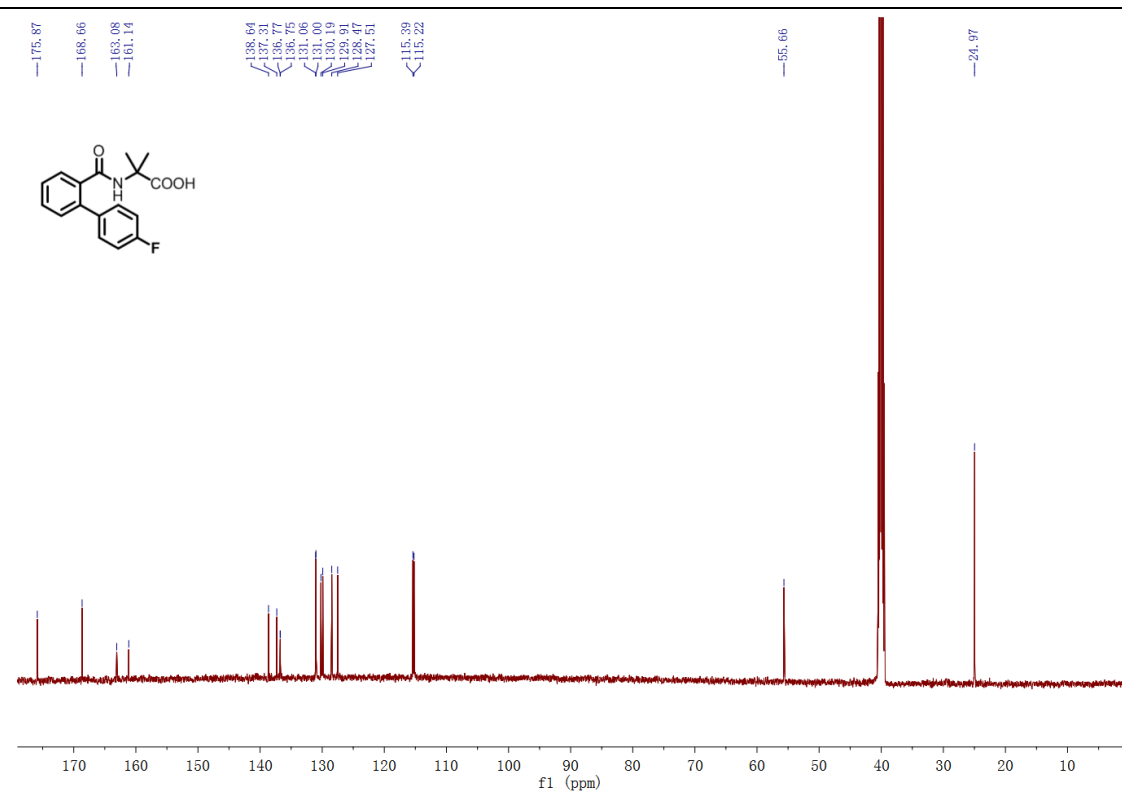

**2-(4'-chloro-[1,1'-biphenyl]-2-ylcarboxamido)-2-methylpropanoic acid (4e)**

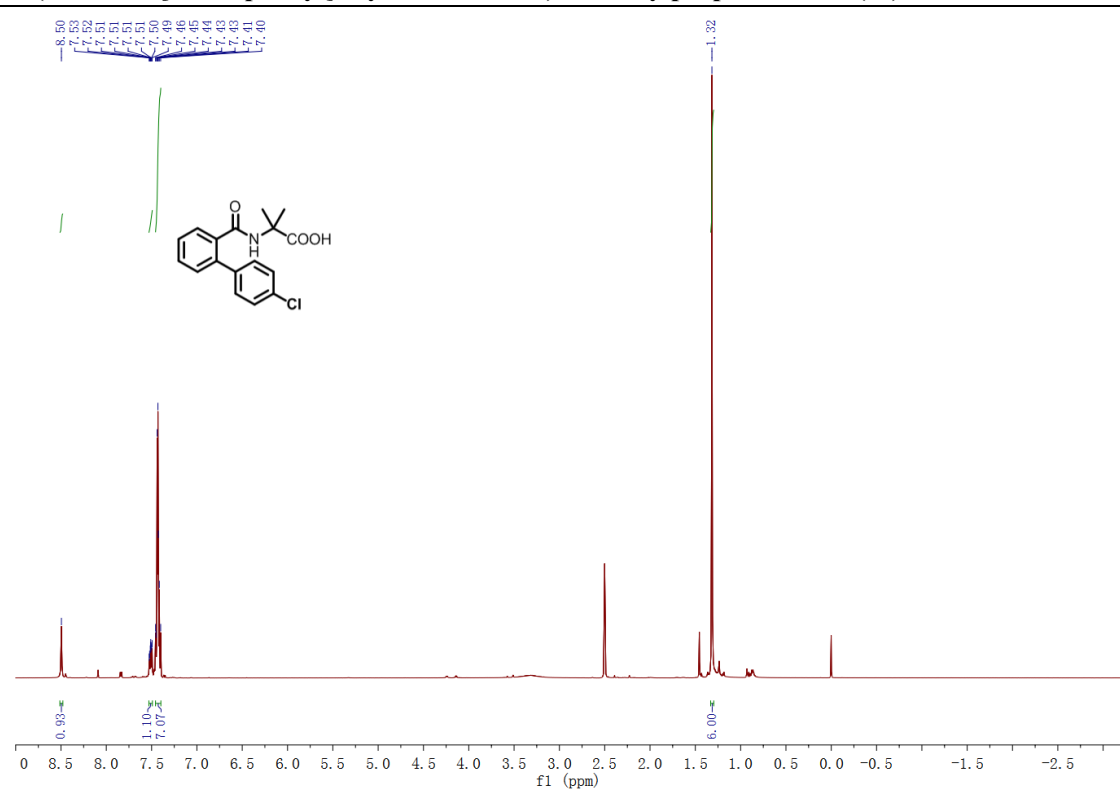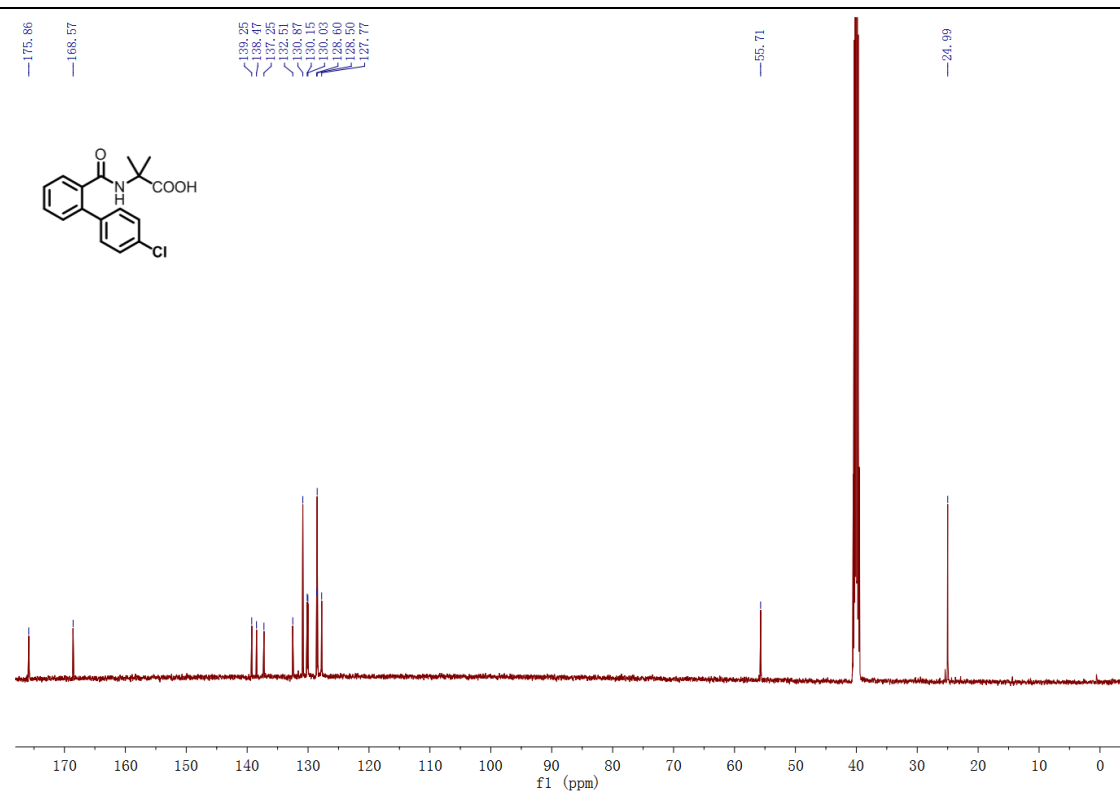

**2-(4'-bromo-[1,1'-biphenyl]-2-ylcarboxamido)-2-methylpropanoic acid (4f)**

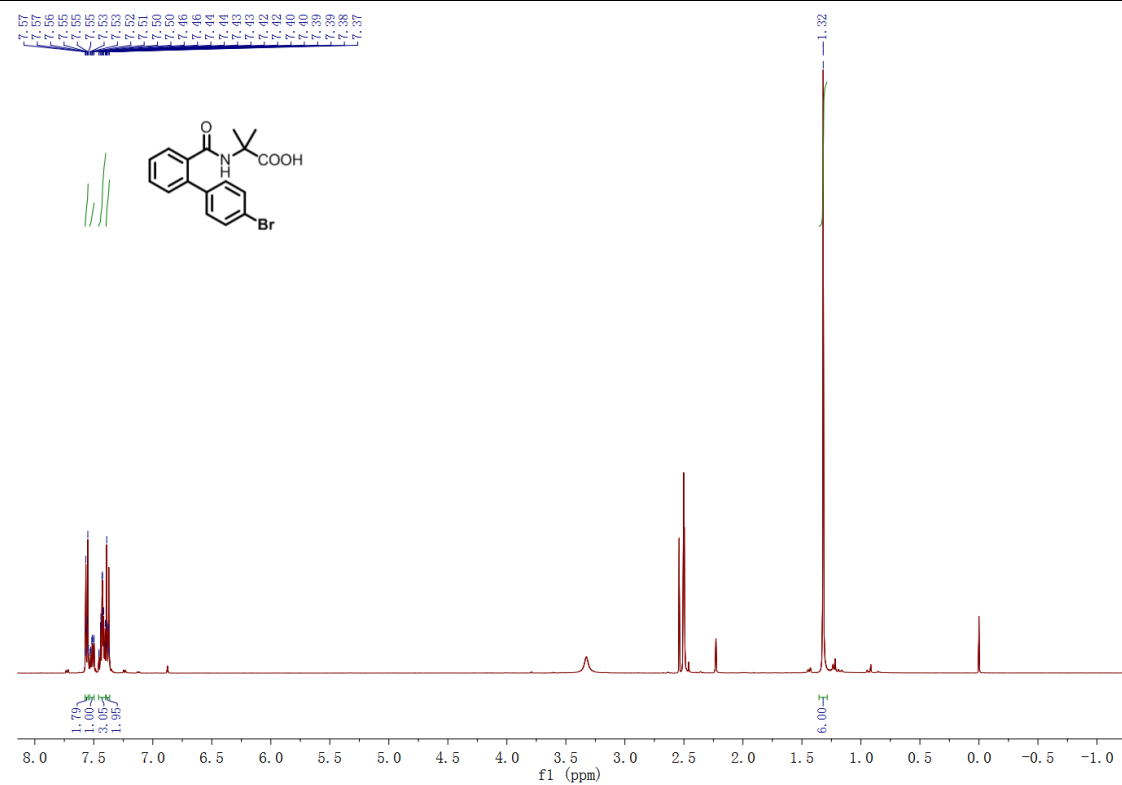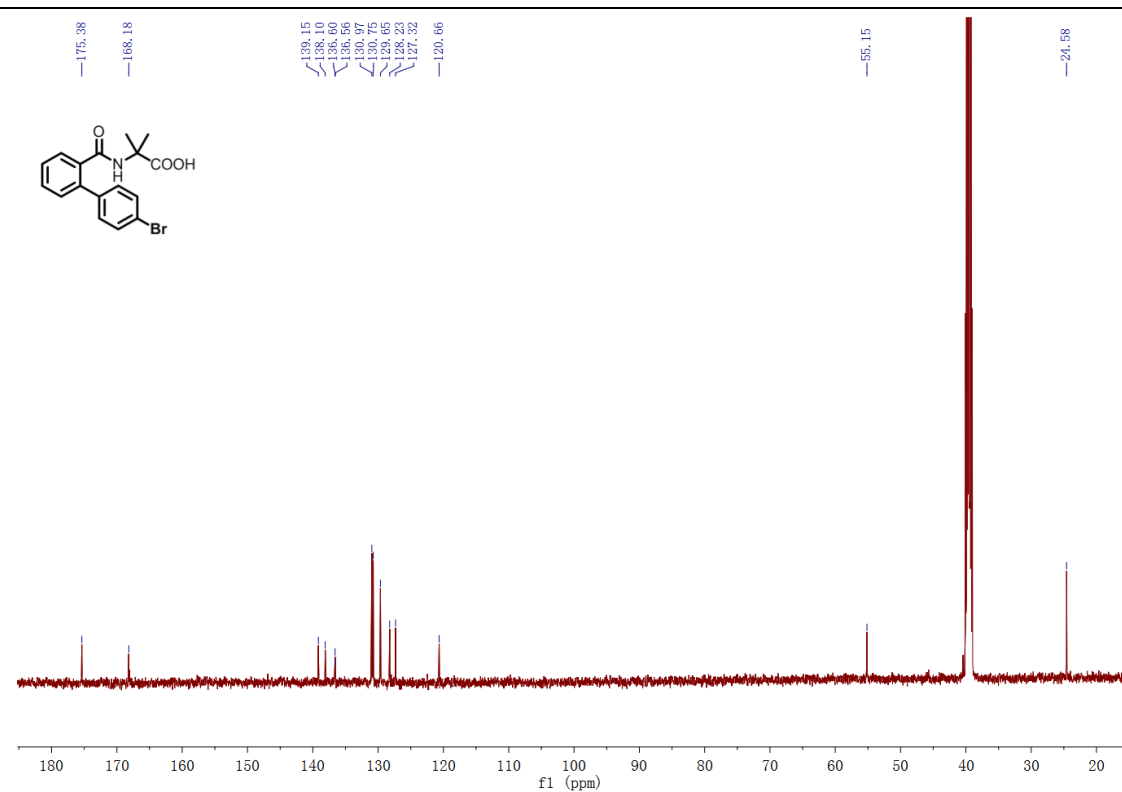



**2-methyl-2-(3'-methyl-[1,1'-biphenyl]-2-ylcarboxamido)propanoic acid (4g)**

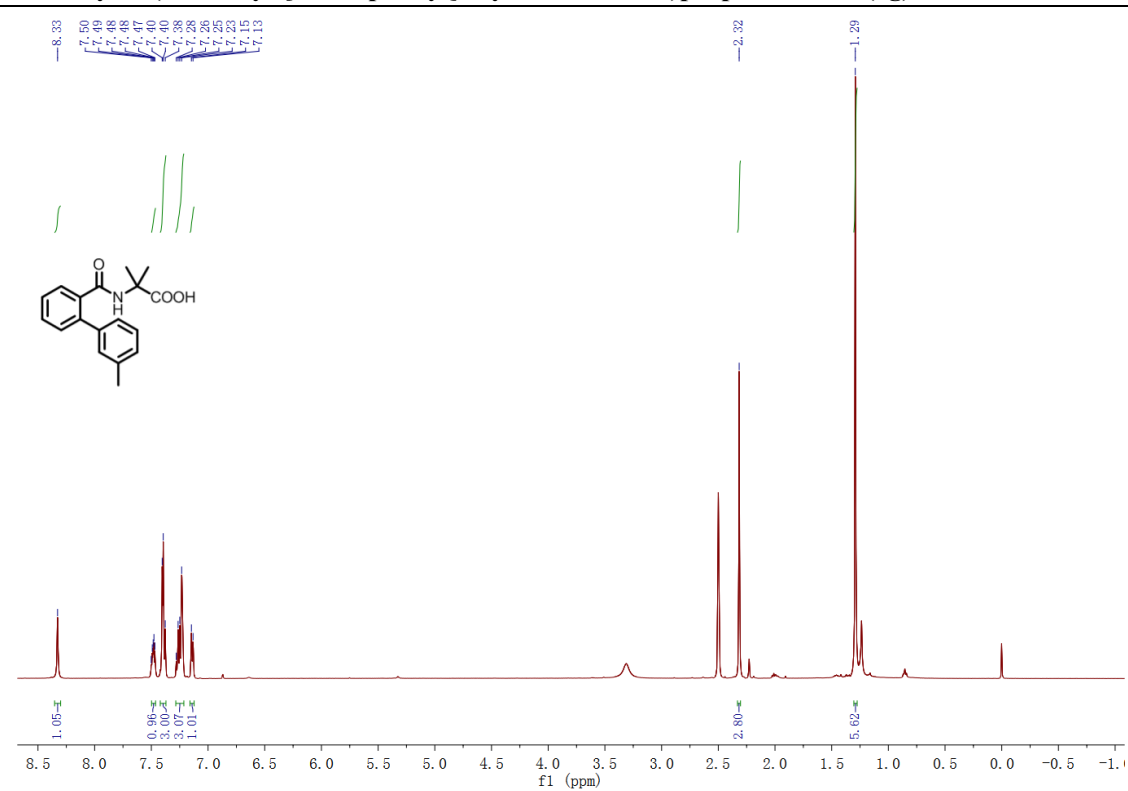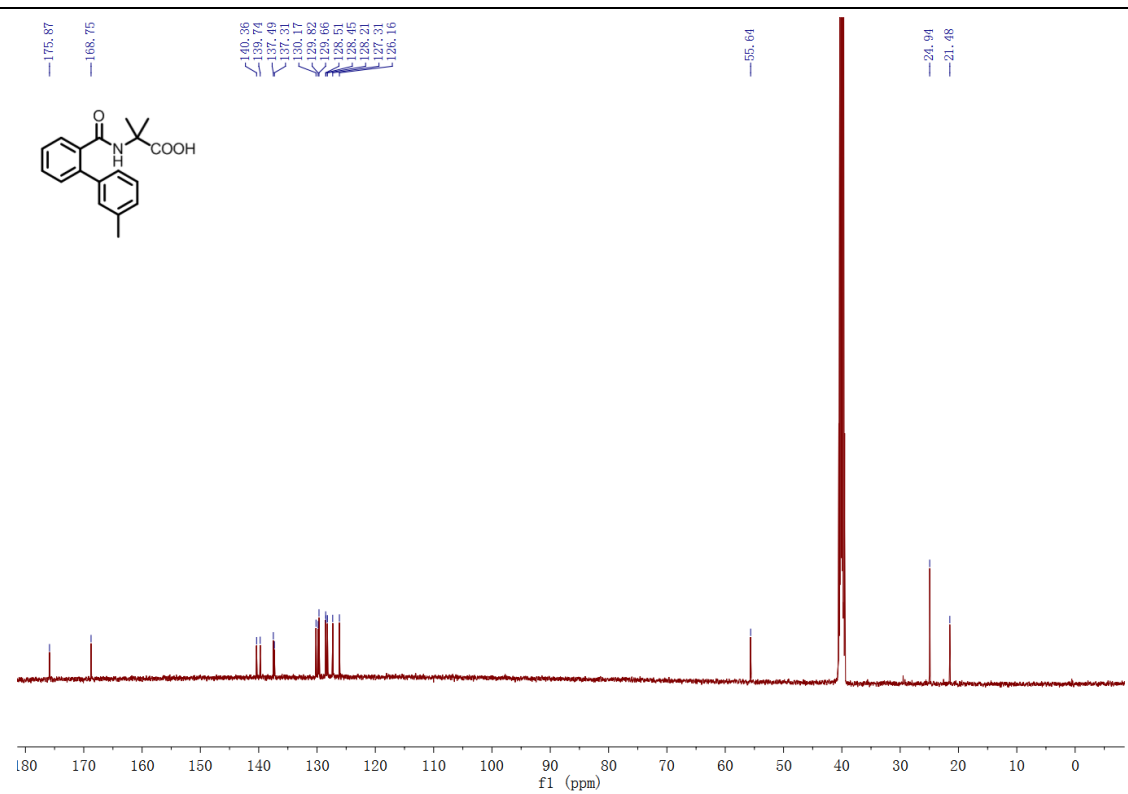

**2-(3'-methoxy-[1,1'-biphenyl]-2-ylcarboxamido)-2-methylpropanoic acid (4h)**

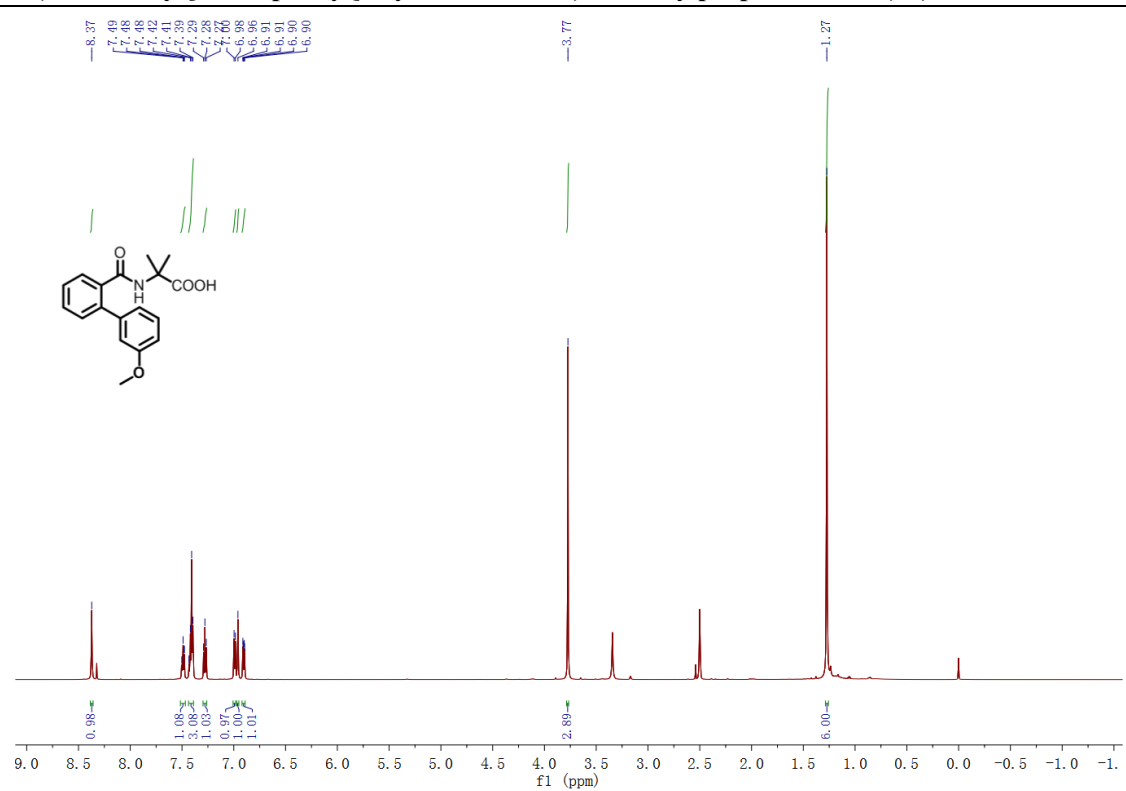

**2-(3'-bromo-[1,1'-biphenyl]-2-ylcarboxamido)-2-methylpropanoic acid (4i)**

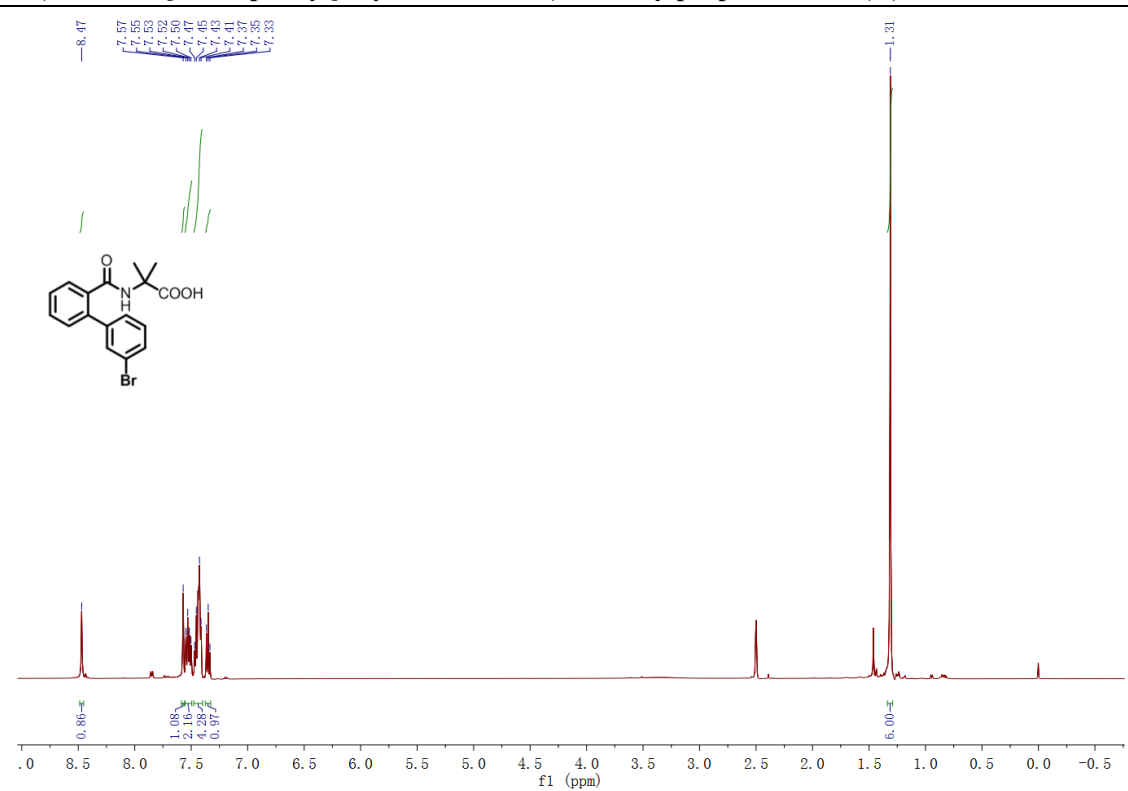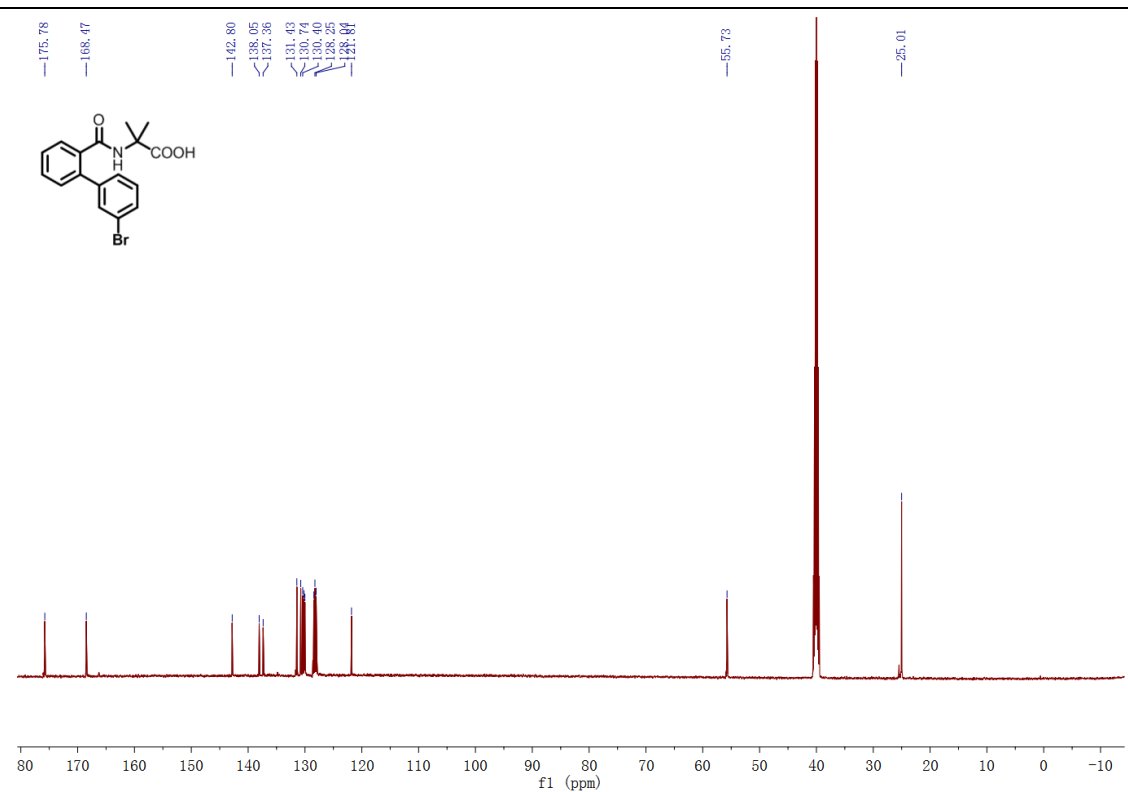

**2-(3',4'-dimethyl-[1,1'-biphenyl]-2-ylcarboxamido)-2-methylpropanoic acid (4j)**

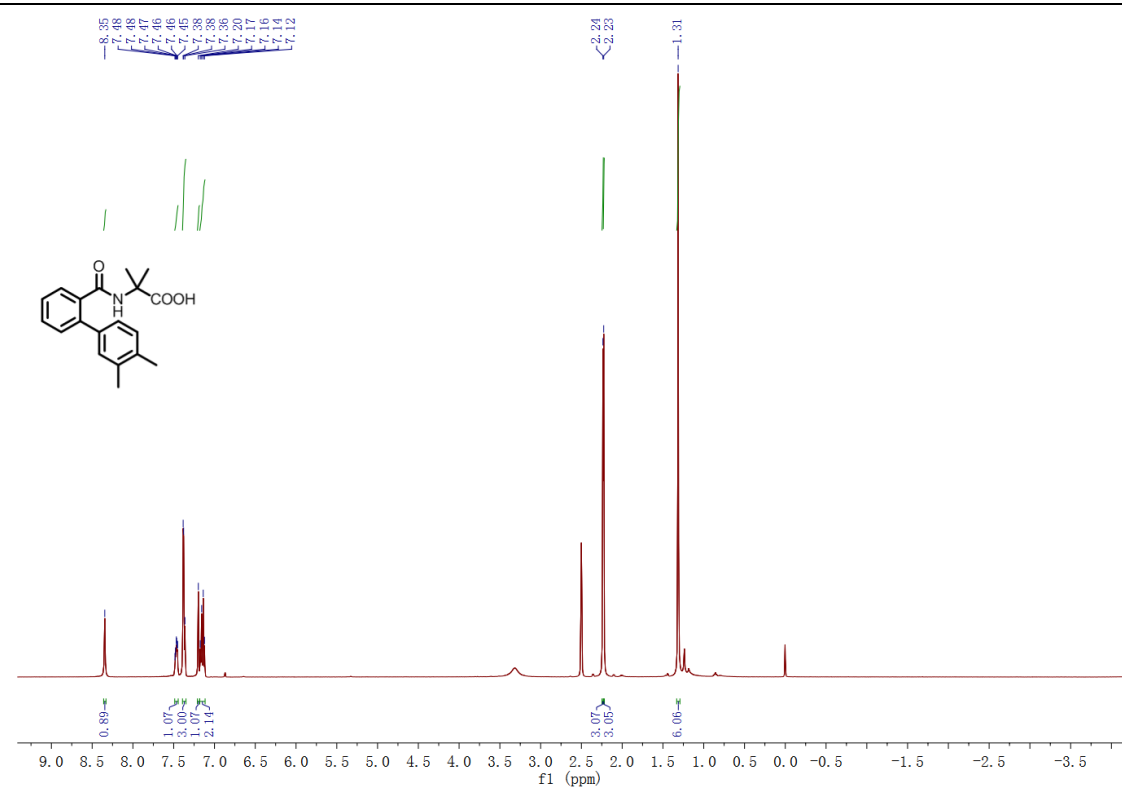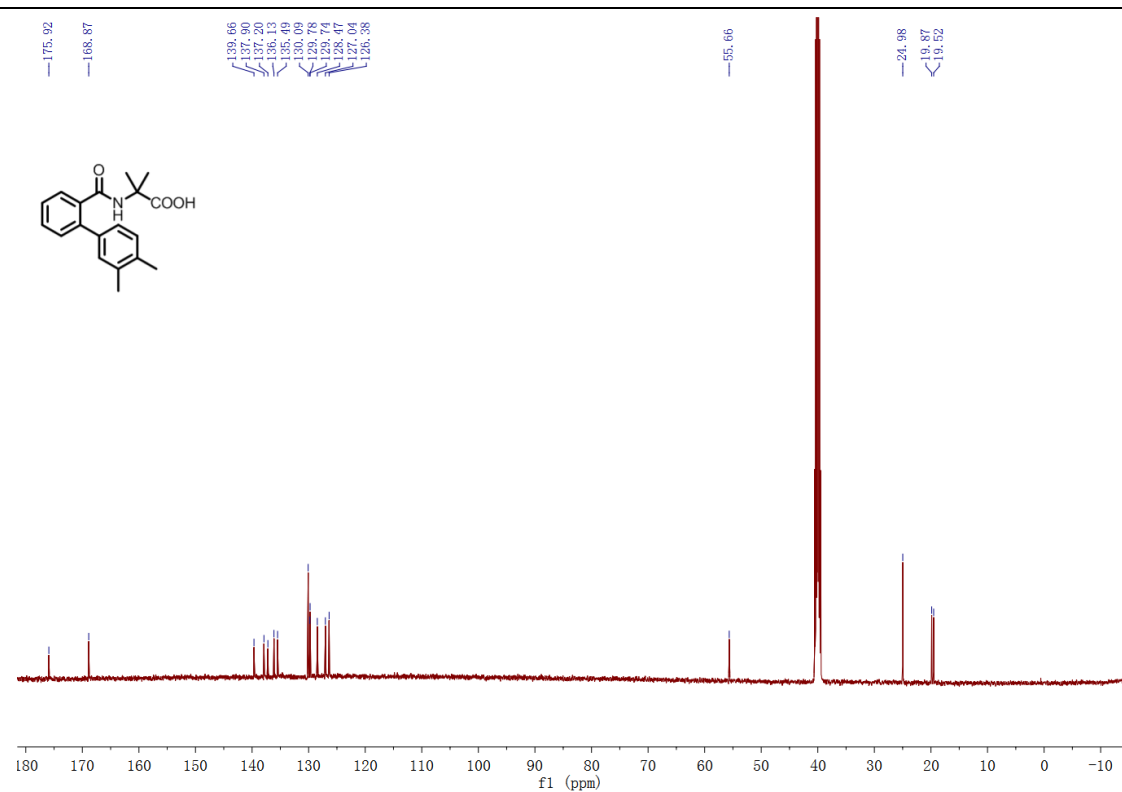

**2-(3',5'-dimethyl-[1,1'-biphenyl]-2-ylcarboxamido)-2-methylpropanoic acid (4k)**

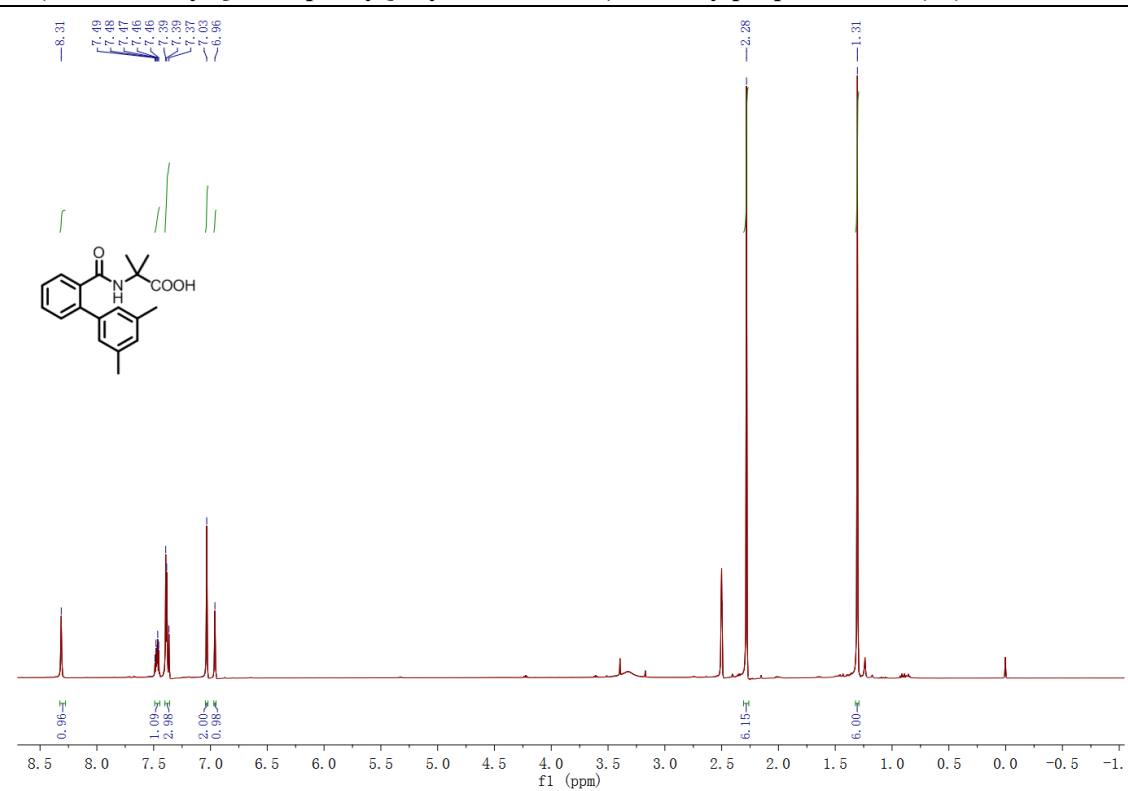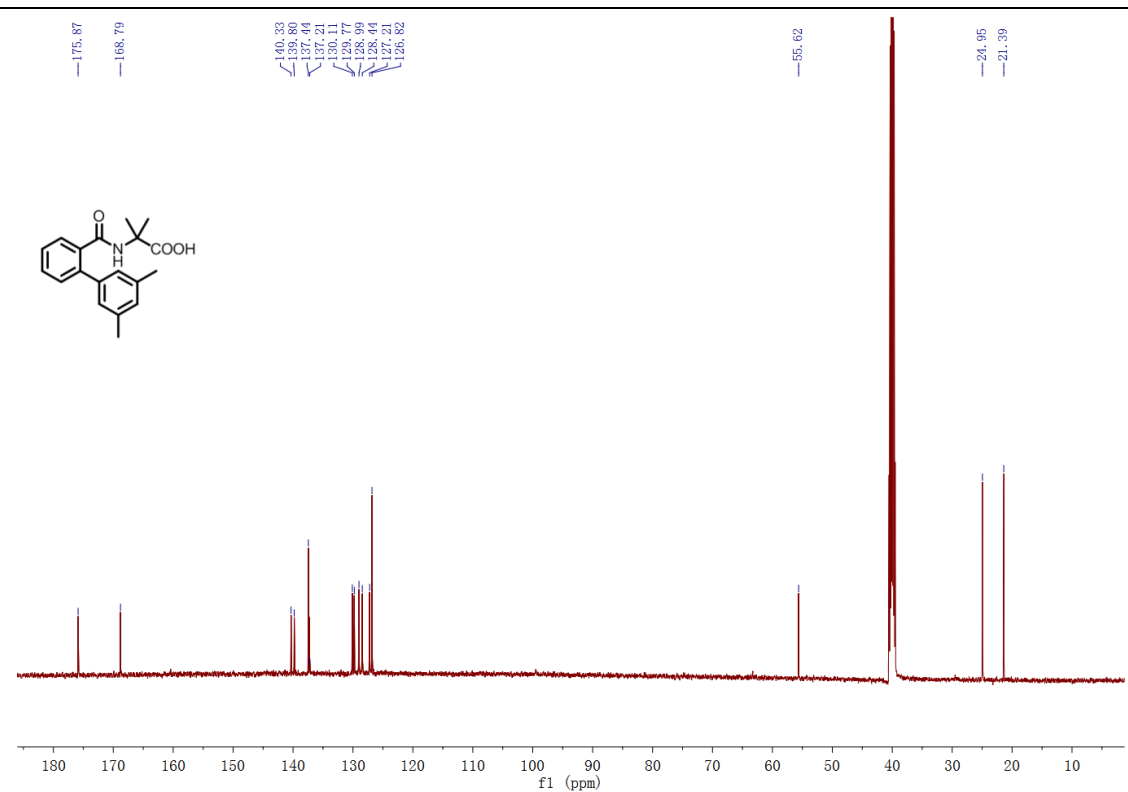

# 2-methyl-2-(2-(thiophen-2-yl)benzamido)propanoic acid (4l)

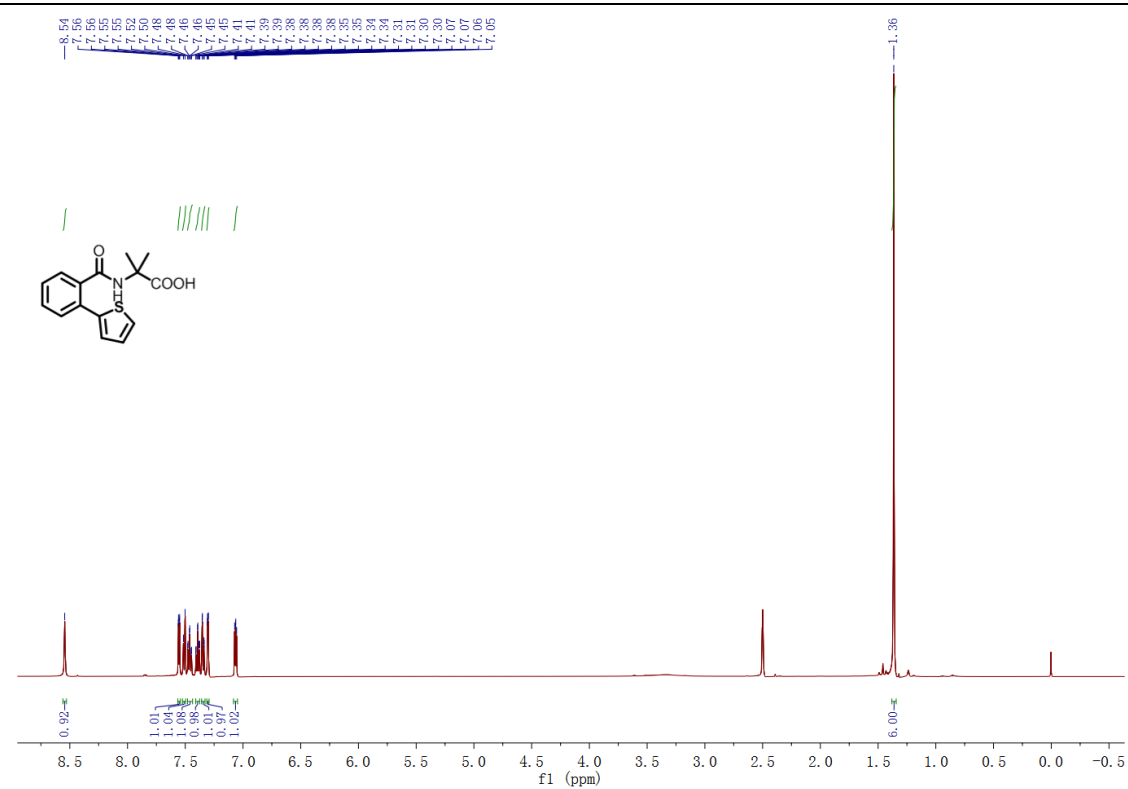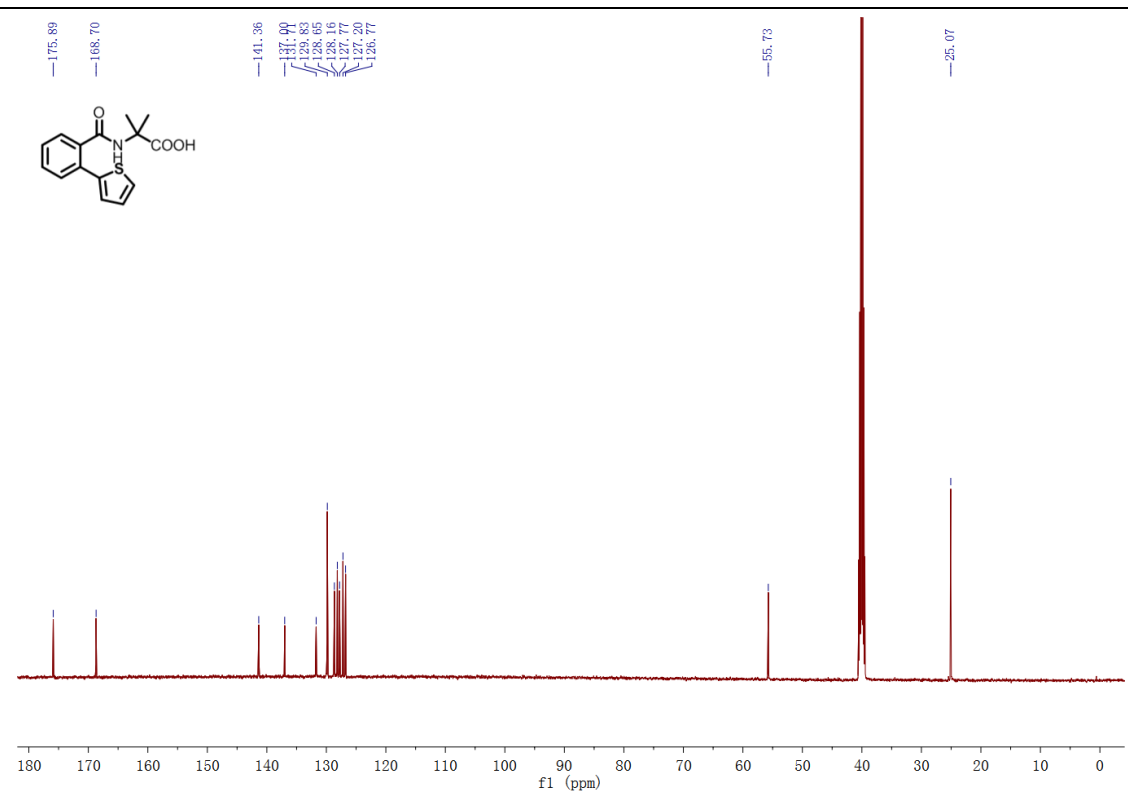

**2-(4'-cyano-[1,1'-biphenyl]-2-ylcarboxamido)-2-methylpropanoic acid (4m)**

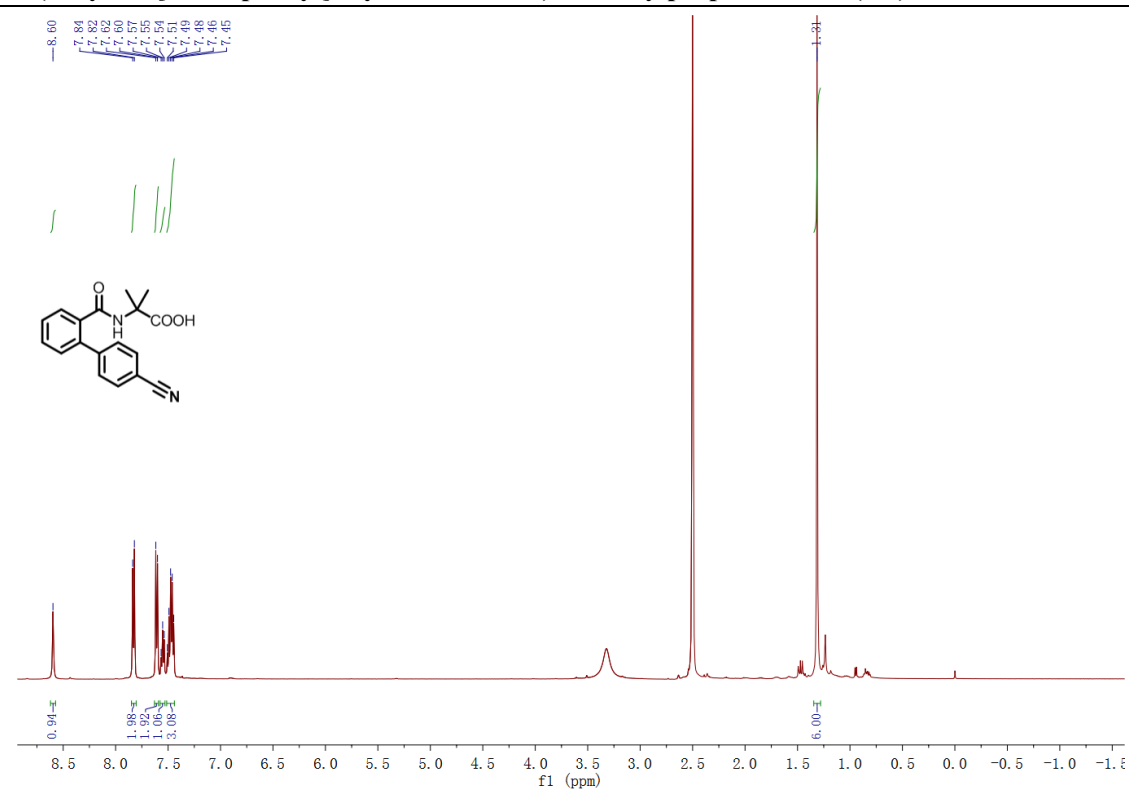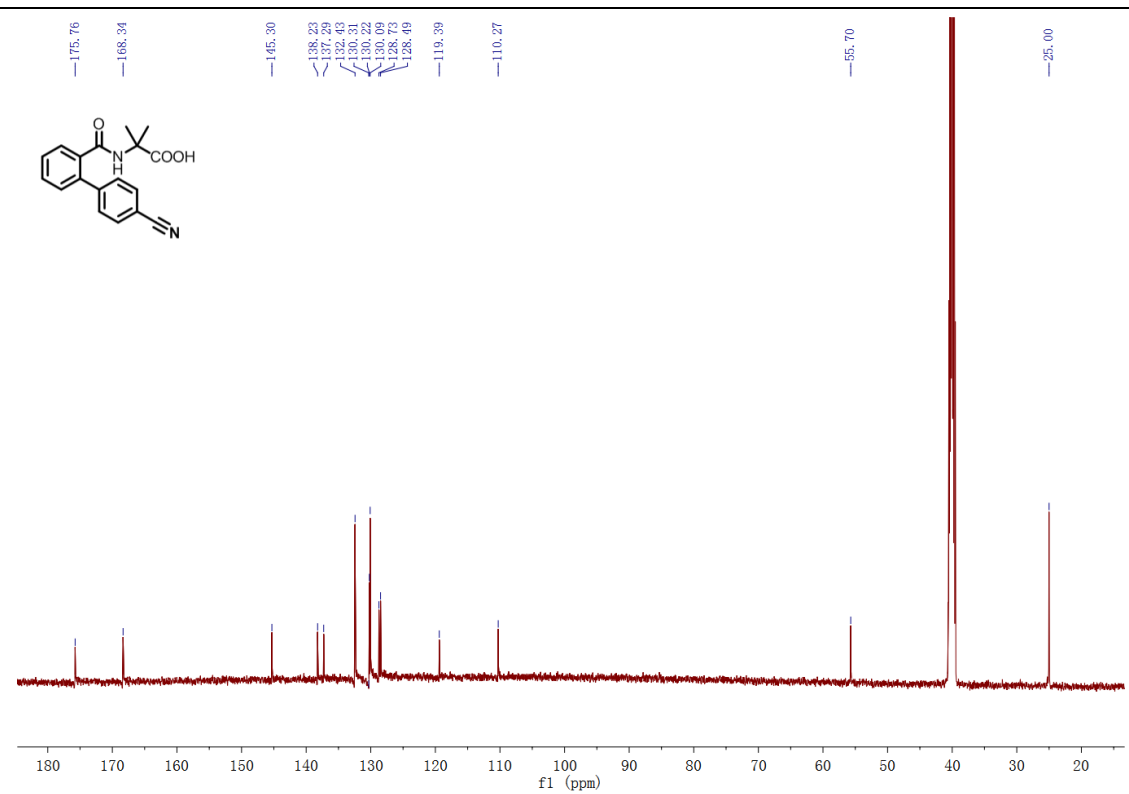

**2-methyl-2-(2-(5-methylthiophen-2-yl)benzamido)propanoic acid (4n)**

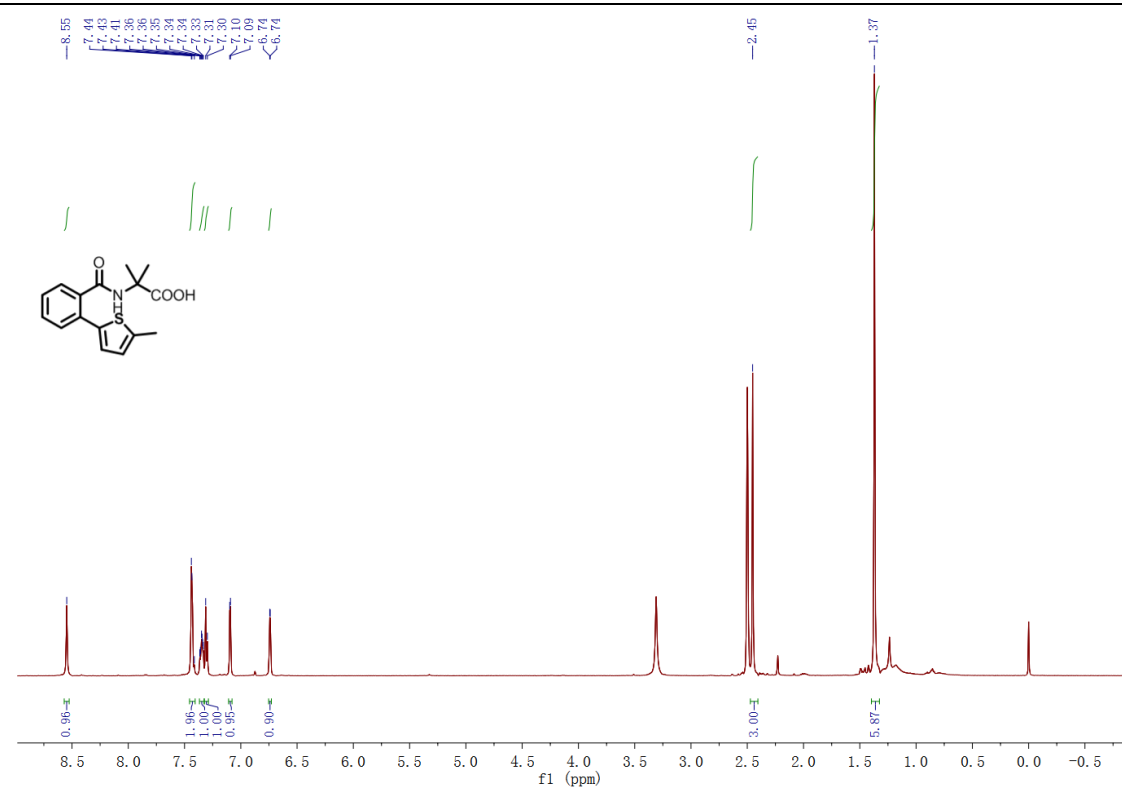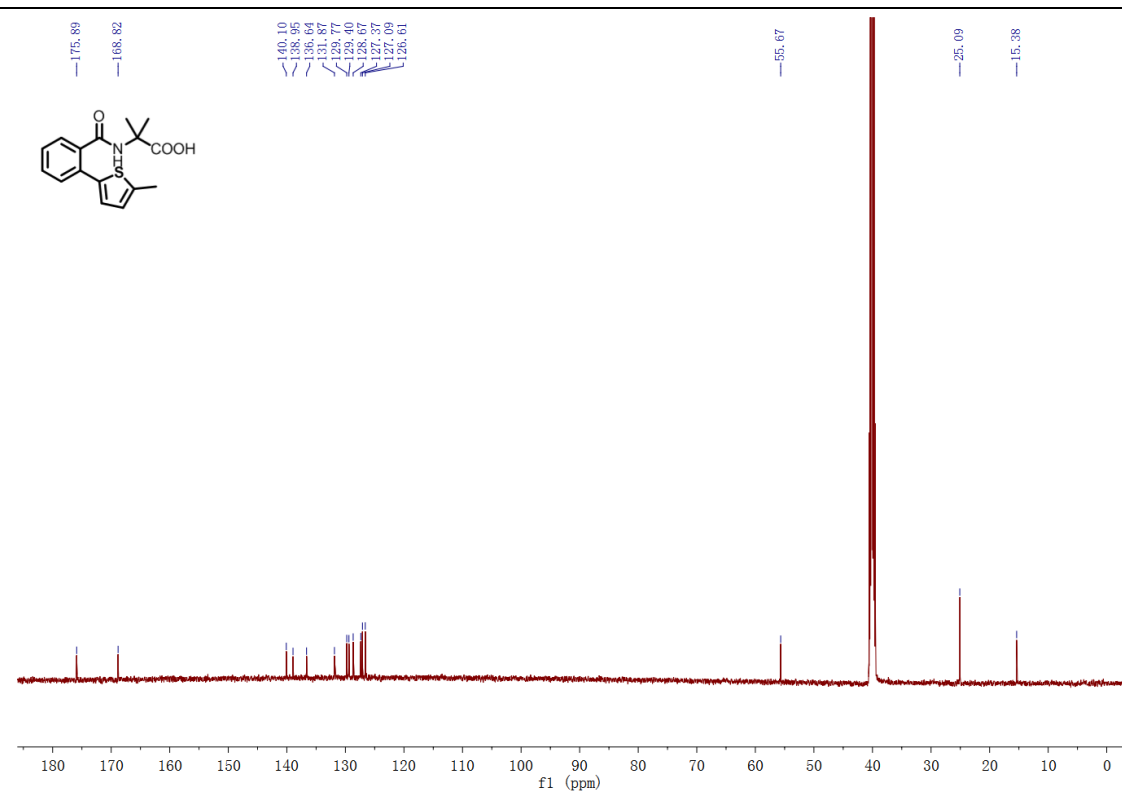



**2-(2-(5-acetylthiophen-2-yl)benzamido)-2-methylpropanoic acid (4o)**

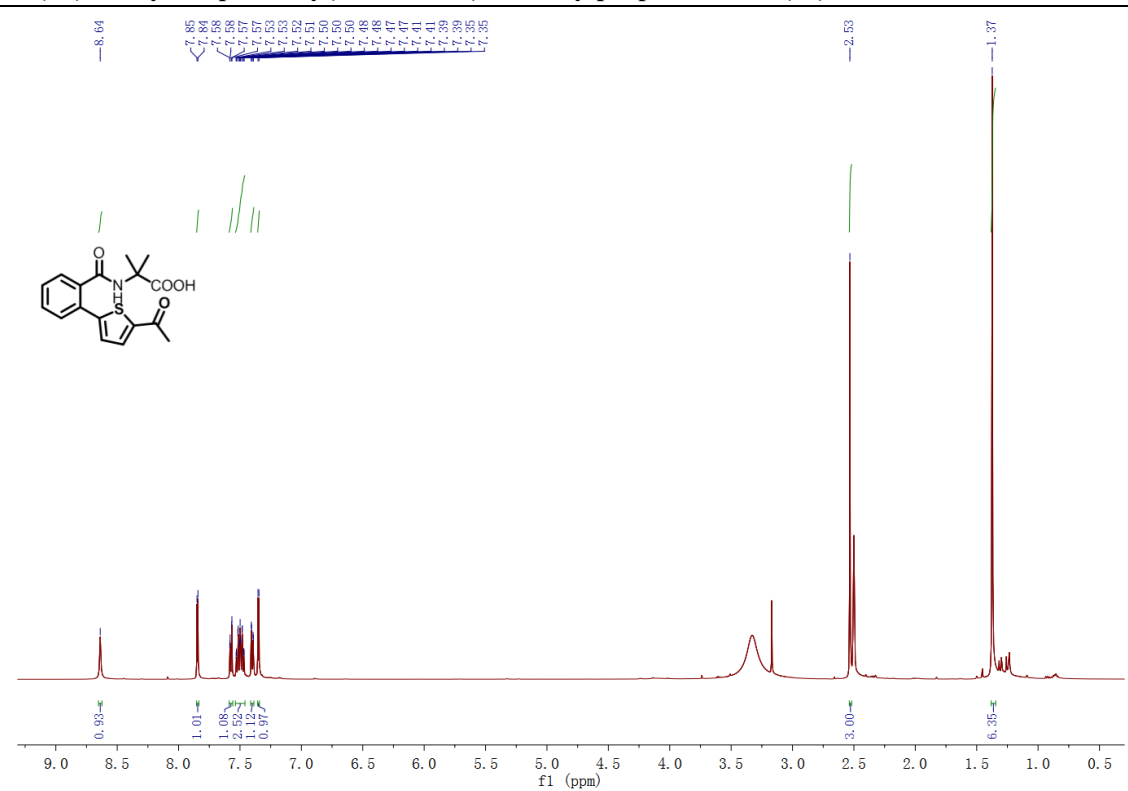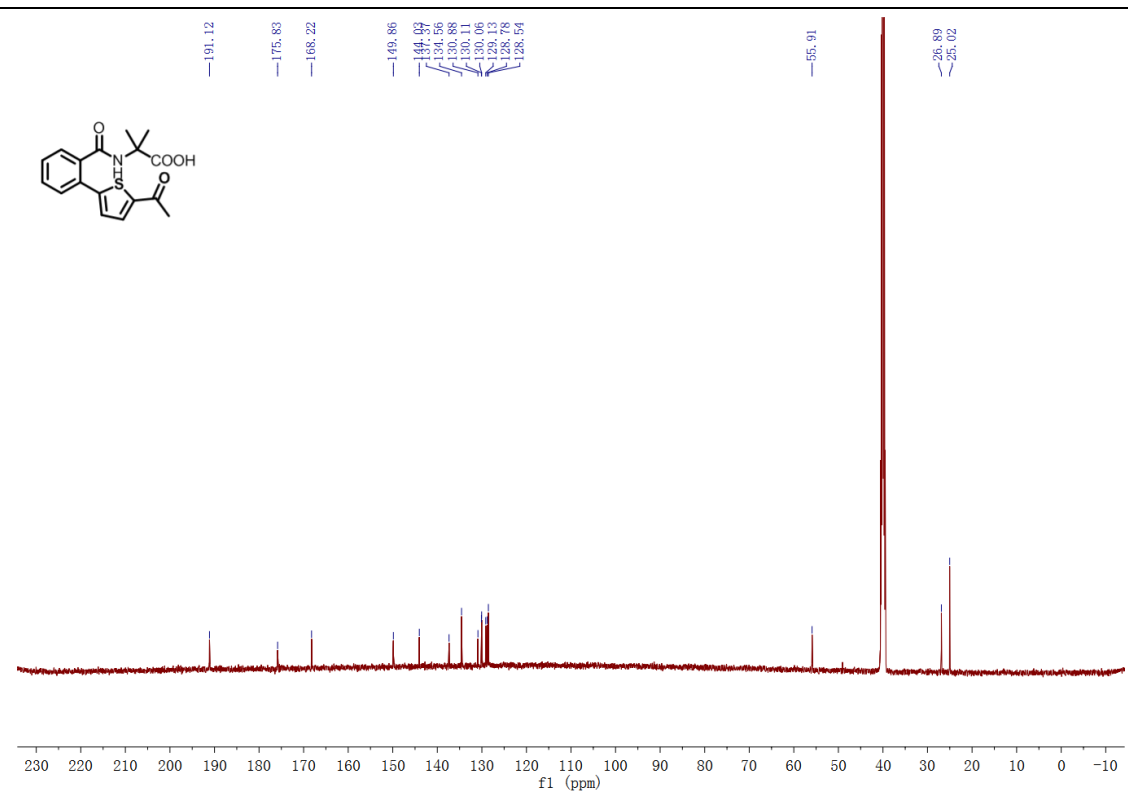

**2-(2-(5-(chlorocarbonyl)thiophen-2-yl)benzamido)-2-methylpropanoic acid (4p)**

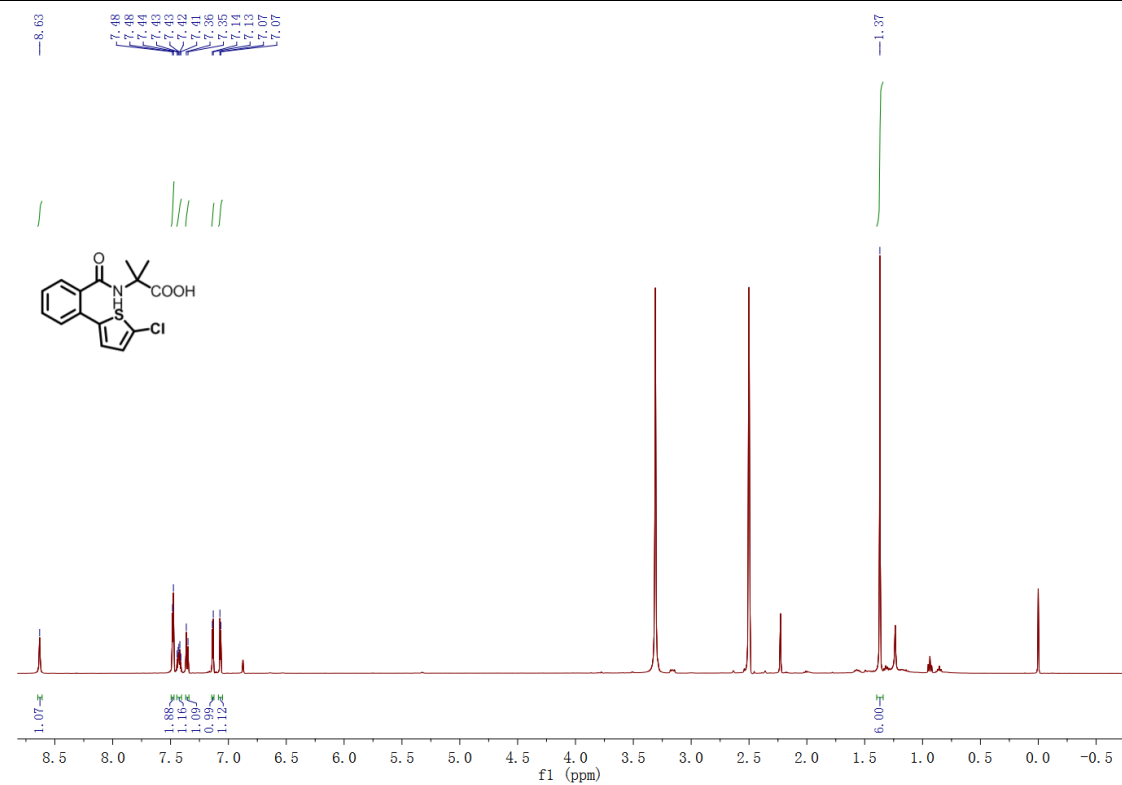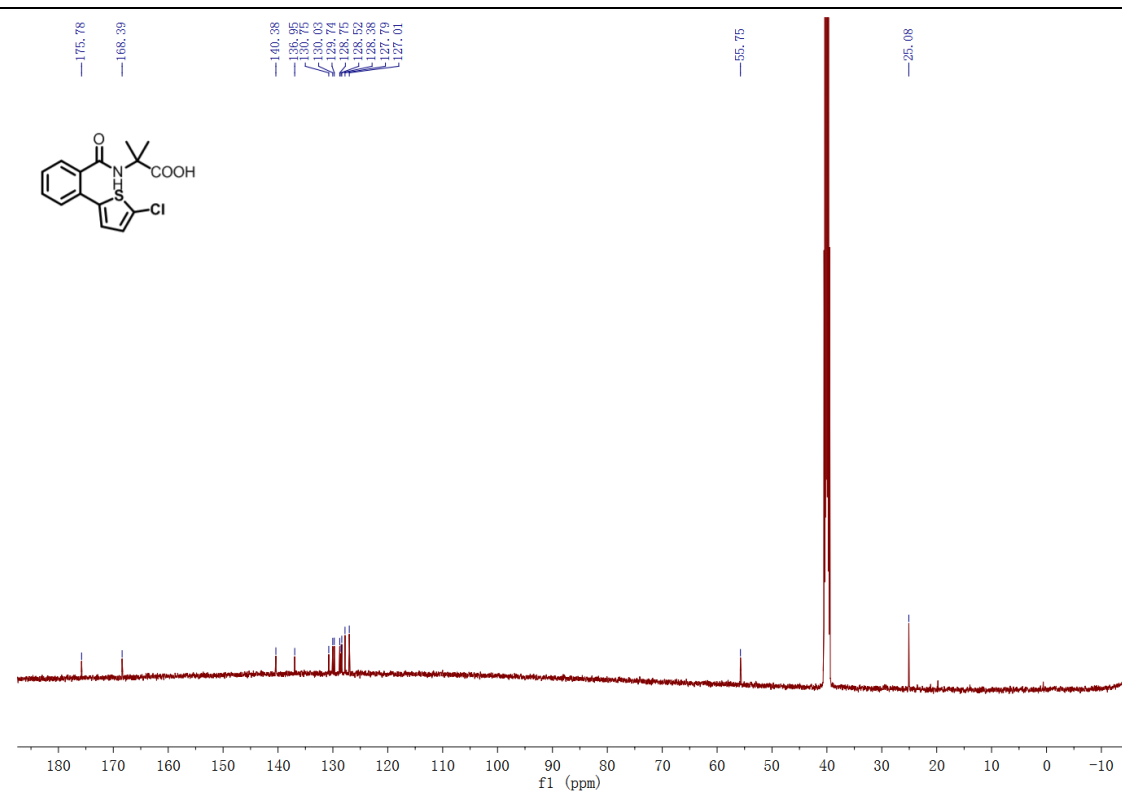

**2-(2-(5-bromothiophen-2-yl)benzamido)-2-methylpropanoic acid (4q)**

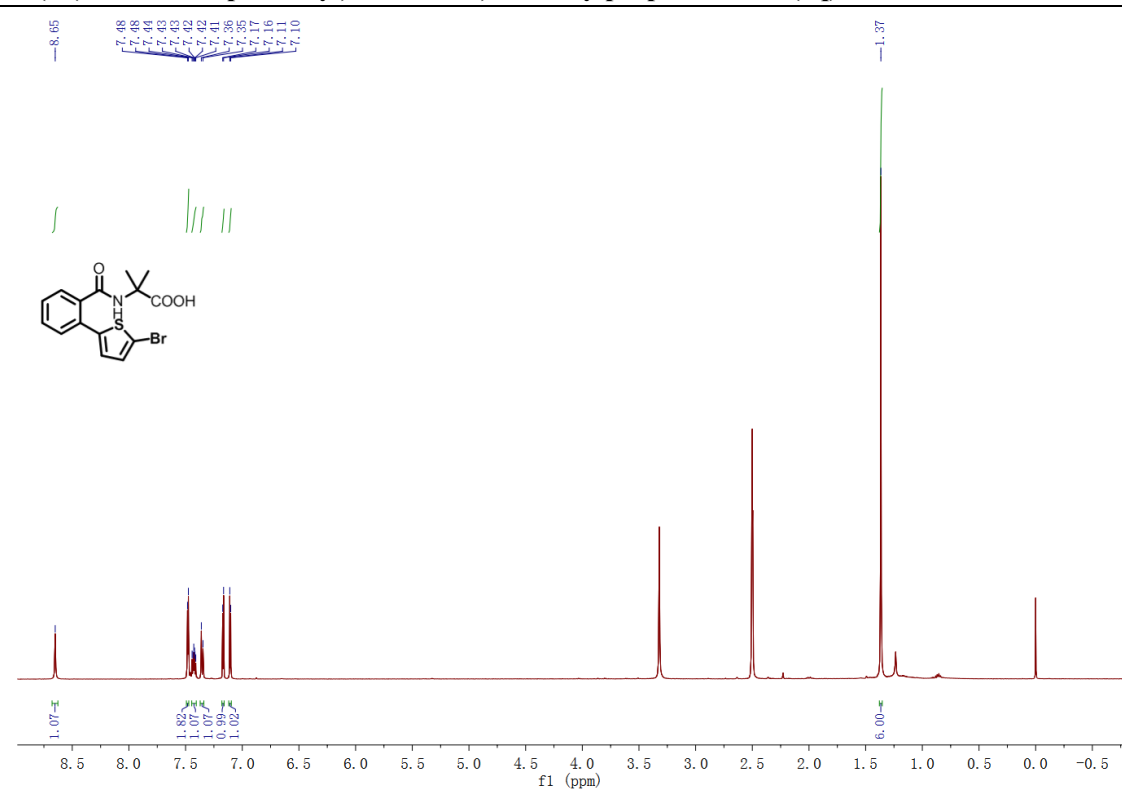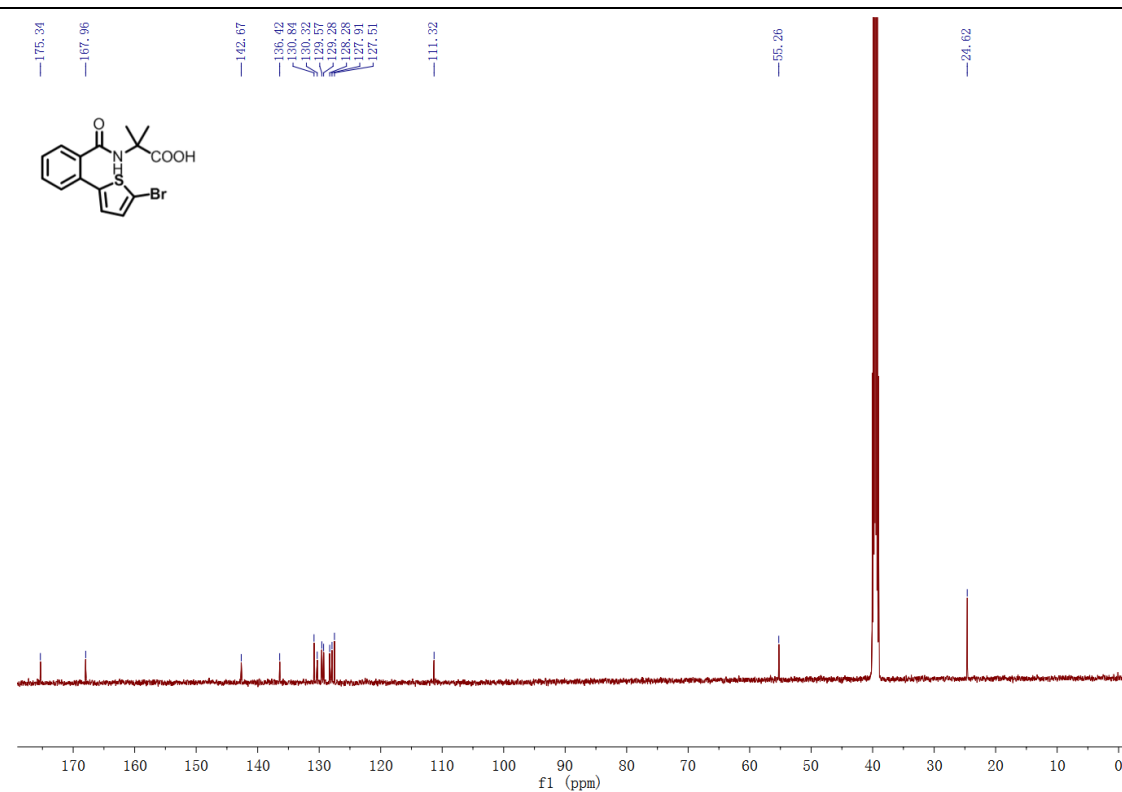

**2-(2-(5'-bromo-[2,2'-bithiophen]-5-yl)benzamido)-2-methylpropanoic acid (4r)**

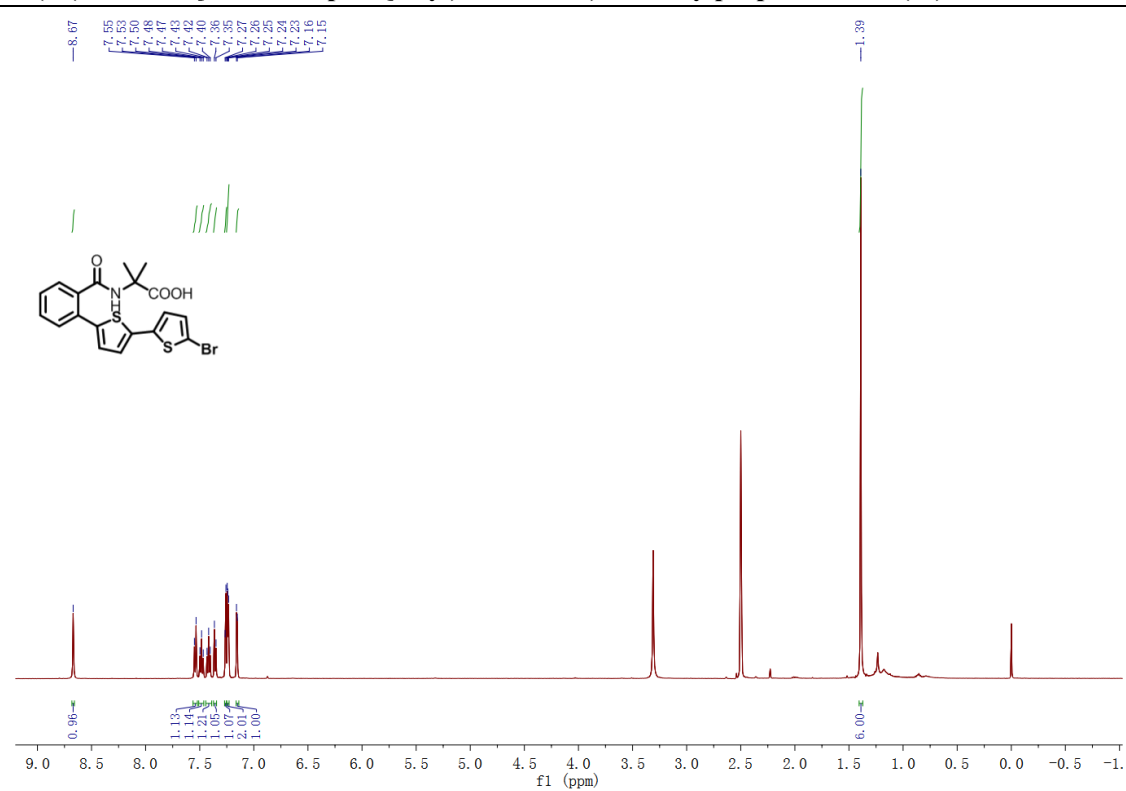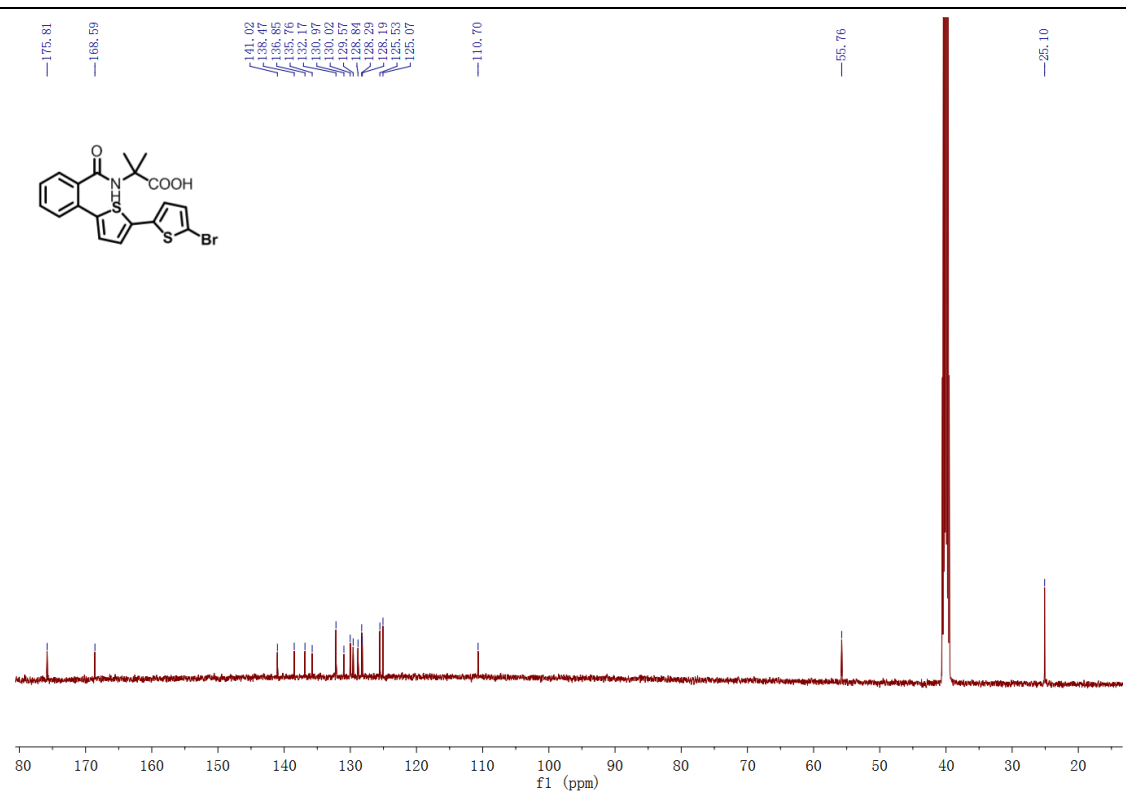

Supplement: c9ra00749k1.pdf [file c9ra00749k1.pdf]
